# Supplementary material
Source: publisher figshare collection journal article supplement (https://acs.figshare.com/ndownloader/files/28457079)
Supplement: Supplementary file 1 [file 28457079]

data_1_a
_audit_creation_date               2020-07-29
_audit_creation_method
;
Olex2 1.3
(compiled 2020.07.16 svn.r6f6c53a7 for OlexSys, GUI svn.r6139)
;
_shelx_SHELXL_version_number       '2018/3'
_audit_contact_author_address      ?
_audit_contact_author_email        ?
_audit_contact_author_name         ''
_audit_contact_author_phone        ?
_publ_contact_author_id_orcid      ?
_publ_section_references
;
Dolomanov, O.V., Bourhis, L.J., Gildea, R.J, Howard, J.A.K. & Puschmann, H.
 (2009), J. Appl. Cryst. 42, 339-341.

Sheldrick, G.M. (2008). Acta Cryst. A64, 112-122.

Sheldrick, G.M. (2015). Acta Cryst. C71, 3-8.
;
_chemical_name_common              ?
_chemical_name_systematic          ?
_chemical_formula_moiety           'C21 H19 Br Mn N3 O3'
_chemical_formula_sum              'C21 H19 Br Mn N3 O3'
_chemical_formula_weight           496.24
_chemical_absolute_configuration   unk
_chemical_melting_point            ?
loop_
  _atom_type_symbol
  _atom_type_description
  _atom_type_scat_dispersion_real
  _atom_type_scat_dispersion_imag
  _atom_type_scat_source
 'C' 'C' 0.0033 0.0016 'International Tables Vol C Tables 4.2.6.8 and 6.1.1.4'
 'H' 'H' 0.0000 0.0000 'International Tables Vol C Tables 4.2.6.8 and 6.1.1.4'
 'Br' 'Br' -0.2901 2.4595
 'International Tables Vol C Tables 4.2.6.8 and 6.1.1.4'
 'Mn' 'Mn' 0.3368 0.7283 'International Tables Vol C Tables 4.2.6.8 and 6.1.1.4'
 'N' 'N' 0.0061 0.0033 'International Tables Vol C Tables 4.2.6.8 and 6.1.1.4'
 'O' 'O' 0.0106 0.0060 'International Tables Vol C Tables 4.2.6.8 and 6.1.1.4'

_shelx_space_group_comment
;
The symmetry employed for this shelxl refinement is uniquely defined
by the following loop, which should always be used as a source of
symmetry information in preference to the above space-group names.
They are only intended as comments.
;
_space_group_crystal_system        'orthorhombic'
_space_group_IT_number             19
_space_group_name_H-M_alt          'P 21 21 21'
_space_group_name_Hall             'P 2ac 2ab'
loop_
  _space_group_symop_operation_xyz
 'x, y, z'
 '-x+1/2, -y, z+1/2'
 '-x, y+1/2, -z+1/2'
 'x+1/2, -y+1/2, -z'

_cell_length_a                     13.1249(10)
_cell_length_b                     18.8575(14)
_cell_length_c                     20.0527(15)
_cell_angle_alpha                  90
_cell_angle_beta                   90
_cell_angle_gamma                  90
_cell_volume                       4963.1(6)
_cell_formula_units_Z              8
_cell_measurement_reflns_used      9015
_cell_measurement_temperature      153(2)
_cell_measurement_theta_max        24.07
_cell_measurement_theta_min        2.16
_shelx_estimated_absorpt_T_max     0.671
_shelx_estimated_absorpt_T_min     0.563
_exptl_absorpt_coefficient_mu      2.165
_exptl_absorpt_correction_T_max    0.7452
_exptl_absorpt_correction_T_min    0.3655
_exptl_absorpt_correction_type     multi-scan
_exptl_absorpt_process_details
;
SADABS-2008/1 (Bruker,2008) was used for absorption correction.
wR2(int) was 0.1349 before and 0.0687 after correction.
The Ratio of minimum to maximum transmission is 0.4905.
The \l/2 correction factor is 0.0015.
;
_exptl_absorpt_special_details     ?
_exptl_crystal_colour              'clear dark yellow'
_exptl_crystal_colour_lustre       clear
_exptl_crystal_colour_modifier     dark
_exptl_crystal_colour_primary      yellow
_exptl_crystal_density_diffrn      1.328
_exptl_crystal_density_meas        .
_exptl_crystal_density_method      ?
_exptl_crystal_description         block
_exptl_crystal_F_000               2000
_exptl_crystal_size_max            0.3
_exptl_crystal_size_mid            0.2
_exptl_crystal_size_min            0.2
_exptl_transmission_factor_max     ?
_exptl_transmission_factor_min     ?
_diffrn_reflns_av_R_equivalents    0.0424
_diffrn_reflns_av_unetI/netI       0.0562
_diffrn_reflns_Laue_measured_fraction_full  0.995
_diffrn_reflns_Laue_measured_fraction_max  0.995
_diffrn_reflns_limit_h_max         11
_diffrn_reflns_limit_h_min         -15
_diffrn_reflns_limit_k_max         22
_diffrn_reflns_limit_k_min         -22
_diffrn_reflns_limit_l_max         23
_diffrn_reflns_limit_l_min         -23
_diffrn_reflns_number              33185
_diffrn_reflns_point_group_measured_fraction_full  0.995
_diffrn_reflns_point_group_measured_fraction_max  0.995
_diffrn_reflns_theta_full          24.999
_diffrn_reflns_theta_max           24.999
_diffrn_reflns_theta_min           1.482
_diffrn_ambient_temperature        153.15
_diffrn_detector_area_resol_mean   'fine-focus sealed tube'
_diffrn_measured_fraction_theta_full  0.995
_diffrn_measured_fraction_theta_max  0.995
_diffrn_measurement_device_type    'Bruker APEX-II CCD'
_diffrn_measurement_method         '\f and \w scans'
_diffrn_radiation_monochromator    'graphite'
_diffrn_radiation_type             MoK\a
_diffrn_radiation_wavelength       0.71073
_diffrn_source                     ?
_diffrn_source_current             0.0
_diffrn_source_power               0.0
_diffrn_source_voltage             0.0
_diffrn_standards_number           0
_reflns_Friedel_coverage           0.803
_reflns_Friedel_fraction_full      0.996
_reflns_Friedel_fraction_max       0.996
_reflns_number_gt                  7571
_reflns_number_total               8715
_reflns_special_details
;
 Reflections were merged by SHELXL according to the crystal
 class for the calculation of statistics and refinement.
 
 Structure factors included contributions from the .fab file.
 
 _reflns_Friedel_fraction is defined as the number of unique
 Friedel pairs measured divided by the number that would be
 possible theoretically, ignoring centric projections and
 systematic absences. Completness statistics refer to single and
 composite reflections containing twin component 1 only.
;
_reflns_threshold_expression       'I > 2\s(I)'
_computing_cell_refinement         'SAINT v7.68A (Bruker, 2009)'
_computing_data_collection         'Bruker SMART APEX II'
_computing_data_reduction          'SAINT v7.68A (Bruker, 2009)'
_computing_molecular_graphics      'Olex2 1.3 (Dolomanov et al., 2009)'
_computing_publication_material    'Olex2 1.3 (Dolomanov et al., 2009)'
_computing_structure_refinement    'SHELXL 2018/3 (Sheldrick, 2015)'
_computing_structure_solution      'SHELXS  (Sheldrick, 2008)'
_refine_diff_density_max           1.044
_refine_diff_density_min           -0.492
_refine_diff_density_rms           0.063
_refine_ls_abs_structure_details
;
 Refined as an inversion twin.
;
_refine_ls_abs_structure_Flack     0.045(11)
_refine_ls_extinction_coef         .
_refine_ls_extinction_method       none
_refine_ls_goodness_of_fit_ref     1.098
_refine_ls_hydrogen_treatment      constr
_refine_ls_matrix_type             full
_refine_ls_number_parameters       526
_refine_ls_number_reflns           8715
_refine_ls_number_restraints       0
_refine_ls_R_factor_all            0.0458
_refine_ls_R_factor_gt             0.0389
_refine_ls_restrained_S_all        1.098
_refine_ls_shift/su_max            0.001
_refine_ls_shift/su_mean           0.000
_refine_ls_structure_factor_coef   Fsqd
_refine_ls_weighting_details      
 'w=1/[\s^2^(Fo^2^)+(0.0445P)^2^] where P=(Fo^2^+2Fc^2^)/3'
_refine_ls_weighting_scheme        calc
_refine_ls_wR_factor_gt            0.0938
_refine_ls_wR_factor_ref           0.0964
_refine_special_details
;
 Refined as a 2-component inversion twin.
;
_olex2_refinement_description
;
1. Twinned data refinement
 Scales: 0.955(11)
 0.045(11)
2. Fixed Uiso
 At 1.2 times of:
  All C(H) groups, All C(H,H) groups, All N(H) groups
 At 1.5 times of:
  All C(H,H,H) groups
3.a Ternary CH refined with riding coordinates:
 C15(H15), C36(H36), N3(H3A), N6(H6A)
3.b Secondary CH2 refined with riding coordinates:
 C16(H16A,H16B), C17(H17A,H17B), C18(H18A,H18B), C37(H37A,H37B), C38(H38A,
 H38B), C39(H39A,H39B)
3.c Aromatic/amide H refined with riding coordinates:
 C43(H43), C2(H2), C3(H3), C5(H5), C6(H6), C8(H8), C9(H9), C10(H10), C22(H22),
 C23(H23), C24(H24), C25(H25), C26(H26), C29(H29), C30(H30), C31(H31)
3.d Idealised Me refined as rotating group:
 C13(H13A,H13B,H13C), C34(H34A,H34B,H34C)
;
_atom_sites_solution_hydrogens     geom
_atom_sites_solution_primary       direct
_atom_sites_solution_secondary     ?
loop_
  _atom_site_label
  _atom_site_type_symbol
  _atom_site_fract_x
  _atom_site_fract_y
  _atom_site_fract_z
  _atom_site_U_iso_or_equiv
  _atom_site_adp_type
  _atom_site_occupancy
  _atom_site_site_symmetry_order
  _atom_site_calc_flag
  _atom_site_refinement_flags_posn
  _atom_site_refinement_flags_adp
  _atom_site_refinement_flags_occupancy
  _atom_site_disorder_assembly
  _atom_site_disorder_group
 Br1 Br 0.66472(5) 0.53713(3) 0.61888(3) 0.03670(16) Uani 1 1 d . . . . .
 Br2 Br 0.66434(6) 0.64970(3) 0.09214(4) 0.0485(2) Uani 1 1 d . . . . .
 C43 C 0.2138(7) 0.6598(6) 0.7377(5) 0.078(3) Uani 1 1 d . . . . .
 H43 H 0.190392 0.682190 0.777284 0.093 Uiso 1 1 calc R U . . .
 C2 C 0.2415(8) 0.6986(5) 0.6854(6) 0.084(3) Uani 1 1 d . . . . .
 H2 H 0.238113 0.748862 0.688554 0.101 Uiso 1 1 calc R U . . .
 C3 C 0.2743(6) 0.6688(4) 0.6278(4) 0.055(2) Uani 1 1 d . . . . .
 H3 H 0.291562 0.698163 0.590927 0.066 Uiso 1 1 calc R U . . .
 C4 C 0.2830(5) 0.5946(3) 0.6222(3) 0.0372(15) Uani 1 1 d . . . . .
 C5 C 0.2550(5) 0.5534(4) 0.6776(3) 0.0388(16) Uani 1 1 d . . . . .
 H5 H 0.260518 0.503231 0.676144 0.047 Uiso 1 1 calc R U . . .
 C6 C 0.2193(6) 0.5870(5) 0.7343(4) 0.059(2) Uani 1 1 d . . . . .
 H6 H 0.198186 0.559439 0.771397 0.071 Uiso 1 1 calc R U . . .
 C7 C 0.3150(5) 0.5624(3) 0.5600(3) 0.0363(15) Uani 1 1 d . . . . .
 C8 C 0.2746(6) 0.5859(4) 0.4999(3) 0.0514(19) Uani 1 1 d . . . . .
 H8 H 0.229109 0.625004 0.501391 0.062 Uiso 1 1 calc R U . . .
 C9 C 0.2954(8) 0.5570(4) 0.4386(3) 0.072(3) Uani 1 1 d . . . . .
 H9 H 0.266603 0.577941 0.399845 0.086 Uiso 1 1 calc R U . . .
 C10 C 0.3566(6) 0.4986(5) 0.4319(3) 0.062(2) Uani 1 1 d . . . . .
 H10 H 0.369541 0.477537 0.389705 0.075 Uiso 1 1 calc R U . . .
 C11 C 0.3998(6) 0.4714(4) 0.4919(3) 0.0437(17) Uani 1 1 d . . . . .
 C12 C 0.3834(5) 0.5049(3) 0.5541(2) 0.0296(14) Uani 1 1 d . . . . .
 C13 C 0.4986(6) 0.3649(4) 0.4510(3) 0.058(2) Uani 1 1 d . . . . .
 H13A H 0.505233 0.389227 0.408037 0.087 Uiso 1 1 calc R U . . .
 H13B H 0.449294 0.326170 0.446923 0.087 Uiso 1 1 calc R U . . .
 H13C H 0.564975 0.345653 0.464259 0.087 Uiso 1 1 calc R U . . .
 C14 C 0.4852(5) 0.4156(3) 0.5678(3) 0.0286(13) Uani 1 1 d . . . . .
 C15 C 0.5565(5) 0.3644(3) 0.5973(3) 0.0348(14) Uani 1 1 d . . . . .
 H15 H 0.620956 0.363108 0.570727 0.042 Uiso 1 1 calc R U . . .
 C16 C 0.5123(6) 0.2868(3) 0.6051(4) 0.0522(19) Uani 1 1 d . . . . .
 H16A H 0.436926 0.287539 0.606869 0.063 Uiso 1 1 calc R U . . .
 H16B H 0.534112 0.256256 0.567540 0.063 Uiso 1 1 calc R U . . .
 C17 C 0.5559(7) 0.2614(4) 0.6691(4) 0.067(2) Uani 1 1 d . . . . .
 H17A H 0.627287 0.245604 0.663343 0.080 Uiso 1 1 calc R U . . .
 H17B H 0.515235 0.221834 0.687672 0.080 Uiso 1 1 calc R U . . .
 C18 C 0.5499(7) 0.3258(4) 0.7129(4) 0.056(2) Uani 1 1 d . . . . .
 H18A H 0.598188 0.322045 0.750627 0.067 Uiso 1 1 calc R U . . .
 H18B H 0.480135 0.332057 0.730684 0.067 Uiso 1 1 calc R U . . .
 C19 C 0.4875(5) 0.5800(4) 0.7033(3) 0.0373(15) Uani 1 1 d . . . . .
 C20 C 0.4248(6) 0.4605(4) 0.7457(3) 0.0474(18) Uani 1 1 d . . . . .
 C21 C 0.6047(6) 0.4944(4) 0.7599(3) 0.0449(17) Uani 1 1 d . . . . .
 C22 C 0.2666(5) 0.6749(3) 0.1827(3) 0.0385(16) Uani 1 1 d . . . . .
 H22 H 0.273853 0.624795 0.181178 0.046 Uiso 1 1 calc R U . . .
 C23 C 0.2396(6) 0.7078(4) 0.2425(4) 0.0535(19) Uani 1 1 d . . . . .
 H23 H 0.230782 0.680135 0.281673 0.064 Uiso 1 1 calc R U . . .
 C24 C 0.2257(6) 0.7797(4) 0.2452(4) 0.058(2) Uani 1 1 d . . . . .
 H24 H 0.206390 0.801454 0.286015 0.069 Uiso 1 1 calc R U . . .
 C25 C 0.2395(6) 0.8204(4) 0.1894(5) 0.059(2) Uani 1 1 d . . . . .
 H25 H 0.228999 0.870190 0.191186 0.071 Uiso 1 1 calc R U . . .
 C26 C 0.2691(5) 0.7882(3) 0.1299(4) 0.0481(18) Uani 1 1 d . . . . .
 H26 H 0.280269 0.816582 0.091476 0.058 Uiso 1 1 calc R U . . .
 C27 C 0.2827(5) 0.7141(3) 0.1260(3) 0.0360(15) Uani 1 1 d . . . . .
 C28 C 0.3090(5) 0.6796(3) 0.0617(3) 0.0346(15) Uani 1 1 d . . . . .
 C29 C 0.2574(6) 0.7033(3) 0.0030(3) 0.0412(16) Uani 1 1 d . . . . .
 H29 H 0.210548 0.741495 0.006748 0.049 Uiso 1 1 calc R U . . .
 C30 C 0.2727(6) 0.6733(4) -0.0582(3) 0.056(2) Uani 1 1 d . . . . .
 H30 H 0.240003 0.693347 -0.096088 0.067 Uiso 1 1 calc R U . . .
 C31 C 0.3329(7) 0.6161(4) -0.0662(3) 0.0545(19) Uani 1 1 d . . . . .
 H31 H 0.341291 0.594264 -0.108522 0.065 Uiso 1 1 calc R U . . .
 C32 C 0.3818(5) 0.5905(3) -0.0105(3) 0.0386(15) Uani 1 1 d . . . . .
 C33 C 0.3739(5) 0.6215(3) 0.0530(3) 0.0271(13) Uani 1 1 d . . . . .
 C34 C 0.4825(7) 0.4869(5) -0.0570(3) 0.066(2) Uani 1 1 d . . . . .
 H34A H 0.433086 0.448600 -0.063733 0.099 Uiso 1 1 calc R U . . .
 H34B H 0.548803 0.466653 -0.045173 0.099 Uiso 1 1 calc R U . . .
 H34C H 0.489014 0.514495 -0.098216 0.099 Uiso 1 1 calc R U . . .
 C35 C 0.4793(5) 0.5331(3) 0.0610(3) 0.0306(13) Uani 1 1 d . . . . .
 C36 C 0.5526(5) 0.4809(3) 0.0882(3) 0.0351(14) Uani 1 1 d . . . . .
 H36 H 0.612933 0.478167 0.057921 0.042 Uiso 1 1 calc R U . . .
 C37 C 0.5106(6) 0.4060(3) 0.0994(4) 0.053(2) Uani 1 1 d . . . . .
 H37A H 0.436214 0.407147 0.107364 0.064 Uiso 1 1 calc R U . . .
 H37B H 0.524872 0.375200 0.060565 0.064 Uiso 1 1 calc R U . . .
 C38 C 0.5664(6) 0.3804(3) 0.1602(4) 0.0470(18) Uani 1 1 d . . . . .
 H38A H 0.636053 0.364075 0.148966 0.056 Uiso 1 1 calc R U . . .
 H38B H 0.529078 0.341548 0.182652 0.056 Uiso 1 1 calc R U . . .
 C39 C 0.5688(6) 0.4471(3) 0.2028(3) 0.0463(18) Uani 1 1 d . . . . .
 H39A H 0.503197 0.453461 0.226438 0.056 Uiso 1 1 calc R U . . .
 H39B H 0.624178 0.444290 0.236247 0.056 Uiso 1 1 calc R U . . .
 C40 C 0.6329(6) 0.6191(3) 0.2382(4) 0.0494(19) Uani 1 1 d . . . . .
 C41 C 0.5044(5) 0.7023(3) 0.1868(3) 0.0381(15) Uani 1 1 d . . . . .
 C42 C 0.4484(6) 0.5839(3) 0.2415(3) 0.0415(17) Uani 1 1 d . . . . .
 Mn1 Mn 0.52113(7) 0.48726(5) 0.69016(4) 0.0292(2) Uani 1 1 d . . . . .
 Mn2 Mn 0.53470(7) 0.60885(4) 0.17732(4) 0.0301(2) Uani 1 1 d . . . . .
 N1 N 0.4423(4) 0.4678(2) 0.6010(2) 0.0267(10) Uani 1 1 d . . . . .
 N2 N 0.4633(4) 0.4156(3) 0.5018(2) 0.0383(13) Uani 1 1 d . . . . .
 N3 N 0.5786(4) 0.3868(3) 0.6670(2) 0.0384(13) Uani 1 1 d . . . . .
 H3A H 0.654452 0.391056 0.669981 0.046 Uiso 1 1 calc R U . . .
 N4 N 0.4392(4) 0.5855(2) 0.0963(2) 0.0250(10) Uani 1 1 d . . . . .
 N5 N 0.4475(4) 0.5331(3) -0.0033(2) 0.0406(13) Uani 1 1 d . . . . .
 N6 N 0.5870(4) 0.5064(2) 0.1559(2) 0.0284(11) Uani 1 1 d . . . . .
 H6A H 0.662748 0.510775 0.152546 0.034 Uiso 1 1 calc R U . . .
 O1 O 0.3643(4) 0.4476(3) 0.7874(2) 0.0588(15) Uani 1 1 d . . . . .
 O2 O 0.4752(4) 0.6376(3) 0.7144(3) 0.0627(15) Uani 1 1 d . . . . .
 O3 O 0.6560(5) 0.5010(3) 0.8058(2) 0.0623(14) Uani 1 1 d . . . . .
 O4 O 0.4936(4) 0.7620(2) 0.1955(3) 0.0596(14) Uani 1 1 d . . . . .
 O5 O 0.3956(5) 0.5699(3) 0.2853(2) 0.0661(16) Uani 1 1 d . . . . .
 O6 O 0.6952(5) 0.6264(3) 0.2767(3) 0.082(2) Uani 1 1 d . . . . .

loop_
  _atom_site_aniso_label
  _atom_site_aniso_U_11
  _atom_site_aniso_U_22
  _atom_site_aniso_U_33
  _atom_site_aniso_U_23
  _atom_site_aniso_U_13
  _atom_site_aniso_U_12
 Br1 0.0268(3) 0.0397(3) 0.0436(3) 0.0082(3) 0.0047(3) 0.0011(3)
 Br2 0.0318(4) 0.0429(3) 0.0709(4) 0.0221(3) 0.0111(4) -0.0030(3)
 C43 0.044(6) 0.117(9) 0.072(6) -0.056(6) -0.005(5) 0.019(6)
 C2 0.061(7) 0.070(6) 0.122(9) -0.055(6) -0.006(6) 0.030(5)
 C3 0.040(5) 0.040(4) 0.085(5) -0.014(4) -0.009(4) 0.005(3)
 C4 0.023(4) 0.037(3) 0.052(4) -0.011(3) 0.002(3) -0.001(3)
 C5 0.026(4) 0.057(4) 0.033(3) -0.007(3) -0.003(3) -0.009(3)
 C6 0.028(4) 0.105(7) 0.045(4) -0.031(4) 0.004(3) -0.008(4)
 C7 0.035(4) 0.035(3) 0.038(3) 0.009(3) 0.005(3) 0.005(3)
 C8 0.050(5) 0.056(4) 0.047(4) 0.014(3) -0.009(4) 0.017(4)
 C9 0.108(8) 0.079(6) 0.027(4) 0.021(4) -0.005(4) 0.036(5)
 C10 0.065(6) 0.104(6) 0.018(3) 0.007(3) -0.008(3) 0.022(5)
 C11 0.046(5) 0.062(4) 0.023(3) -0.002(3) 0.002(3) 0.008(4)
 C12 0.038(4) 0.032(3) 0.018(3) 0.003(2) -0.003(2) 0.002(3)
 C13 0.059(5) 0.085(6) 0.031(3) -0.033(3) -0.001(3) 0.015(4)
 C14 0.022(3) 0.039(3) 0.025(3) 0.001(2) -0.002(2) -0.002(3)
 C15 0.020(3) 0.035(3) 0.049(4) -0.002(3) -0.005(3) 0.001(3)
 C16 0.046(5) 0.028(3) 0.083(5) -0.003(3) -0.016(4) -0.001(3)
 C17 0.064(6) 0.045(4) 0.091(6) 0.022(4) -0.002(5) 0.000(4)
 C18 0.059(6) 0.048(4) 0.060(4) 0.029(3) 0.007(4) 0.010(4)
 C19 0.034(4) 0.045(4) 0.032(3) -0.011(3) -0.001(3) -0.012(3)
 C20 0.040(4) 0.075(5) 0.027(3) 0.002(3) -0.007(3) -0.022(4)
 C21 0.045(4) 0.061(4) 0.028(3) 0.007(3) -0.006(3) -0.016(4)
 C22 0.038(4) 0.029(3) 0.049(4) -0.001(3) 0.001(3) 0.007(3)
 C23 0.041(5) 0.071(5) 0.048(4) -0.004(4) 0.006(3) 0.005(4)
 C24 0.046(5) 0.060(5) 0.068(5) -0.032(4) 0.003(4) 0.008(4)
 C25 0.041(5) 0.037(4) 0.098(6) -0.028(4) 0.009(4) 0.000(3)
 C26 0.032(4) 0.034(3) 0.079(5) 0.009(3) 0.008(4) -0.004(3)
 C27 0.026(4) 0.024(3) 0.058(4) 0.003(3) 0.011(3) 0.005(3)
 C28 0.022(4) 0.036(3) 0.046(4) 0.014(3) 0.000(3) 0.002(3)
 C29 0.035(4) 0.044(4) 0.045(4) 0.020(3) -0.003(3) 0.007(3)
 C30 0.056(6) 0.066(5) 0.046(4) 0.025(4) -0.012(4) 0.015(4)
 C31 0.058(5) 0.076(5) 0.030(3) 0.000(3) 0.000(3) 0.014(5)
 C32 0.032(4) 0.045(4) 0.039(3) -0.001(3) -0.005(3) 0.012(3)
 C33 0.030(4) 0.023(3) 0.028(3) 0.001(2) -0.003(3) -0.004(2)
 C34 0.062(6) 0.095(6) 0.041(4) -0.026(4) -0.004(4) 0.020(5)
 C35 0.026(3) 0.036(3) 0.029(3) 0.004(3) -0.007(3) 0.001(3)
 C36 0.036(4) 0.037(3) 0.032(3) 0.002(3) 0.003(3) 0.006(3)
 C37 0.037(4) 0.027(3) 0.096(6) 0.001(3) -0.008(4) 0.003(3)
 C38 0.038(4) 0.037(4) 0.066(4) 0.021(3) 0.001(4) -0.001(3)
 C39 0.052(5) 0.041(4) 0.046(4) 0.022(3) 0.005(3) -0.003(3)
 C40 0.055(5) 0.035(4) 0.058(4) -0.009(3) -0.016(4) -0.001(3)
 C41 0.028(4) 0.038(4) 0.048(4) -0.009(3) -0.004(3) 0.000(3)
 C42 0.051(5) 0.045(4) 0.029(3) 0.004(3) -0.004(3) 0.003(3)
 Mn1 0.0284(5) 0.0377(5) 0.0214(4) -0.0007(3) -0.0019(4) -0.0065(4)
 Mn2 0.0281(5) 0.0305(5) 0.0317(5) 0.0018(4) -0.0031(4) -0.0033(4)
 N1 0.026(3) 0.028(2) 0.026(2) 0.000(2) -0.001(2) 0.002(2)
 N2 0.040(4) 0.049(3) 0.026(2) -0.006(2) -0.001(2) 0.012(3)
 N3 0.037(3) 0.035(3) 0.043(3) 0.010(2) -0.010(3) -0.005(2)
 N4 0.024(3) 0.023(2) 0.028(2) -0.0006(19) 0.001(2) -0.002(2)
 N5 0.041(4) 0.048(3) 0.033(3) -0.004(2) -0.001(2) 0.014(3)
 N6 0.024(3) 0.034(3) 0.028(2) 0.007(2) 0.003(2) -0.004(2)
 O1 0.061(4) 0.086(4) 0.029(2) -0.001(2) 0.003(2) -0.021(3)
 O2 0.047(3) 0.059(3) 0.082(4) -0.038(3) -0.004(3) -0.006(3)
 O3 0.069(4) 0.072(3) 0.046(3) -0.006(2) -0.030(3) -0.011(3)
 O4 0.043(3) 0.039(3) 0.097(4) -0.024(3) -0.011(3) -0.005(2)
 O5 0.072(4) 0.084(4) 0.043(3) 0.018(3) 0.030(3) 0.016(3)
 O6 0.093(5) 0.059(3) 0.094(4) -0.014(3) -0.063(4) 0.010(3)

_geom_special_details
;
 All esds (except the esd in the dihedral angle between two l.s. planes)
 are estimated using the full covariance matrix.  The cell esds are taken
 into account individually in the estimation of esds in distances, angles
 and torsion angles; correlations between esds in cell parameters are only
 used when they are defined by crystal symmetry.  An approximate (isotropic)
 treatment of cell esds is used for estimating esds involving l.s. planes.
;
loop_
  _geom_bond_atom_site_label_1
  _geom_bond_atom_site_label_2
  _geom_bond_distance
  _geom_bond_site_symmetry_2
  _geom_bond_publ_flag
 Br1 Mn1 2.5453(11) . ?
 Br2 Mn2 2.5311(11) . ?
 C43 H43 0.9500 . ?
 C43 C2 1.330(14) . ?
 C43 C6 1.376(13) . ?
 C2 H2 0.9500 . ?
 C2 C3 1.356(12) . ?
 C3 H3 0.9500 . ?
 C3 C4 1.408(9) . ?
 C4 C5 1.405(9) . ?
 C4 C7 1.450(9) . ?
 C5 H5 0.9500 . ?
 C5 C6 1.383(9) . ?
 C6 H6 0.9500 . ?
 C7 C8 1.389(9) . ?
 C7 C12 1.412(8) . ?
 C8 H8 0.9500 . ?
 C8 C9 1.373(10) . ?
 C9 H9 0.9500 . ?
 C9 C10 1.368(11) . ?
 C10 H10 0.9500 . ?
 C10 C11 1.427(8) . ?
 C11 C12 1.413(8) . ?
 C11 N2 1.357(8) . ?
 C12 N1 1.404(7) . ?
 C13 H13A 0.9800 . ?
 C13 H13B 0.9800 . ?
 C13 H13C 0.9800 . ?
 C13 N2 1.472(8) . ?
 C14 C15 1.468(8) . ?
 C14 N1 1.315(7) . ?
 C14 N2 1.354(7) . ?
 C15 H15 1.0000 . ?
 C15 C16 1.581(8) . ?
 C15 N3 1.490(7) . ?
 C16 H16A 0.9900 . ?
 C16 H16B 0.9900 . ?
 C16 C17 1.485(10) . ?
 C17 H17A 0.9900 . ?
 C17 H17B 0.9900 . ?
 C17 C18 1.500(11) . ?
 C18 H18A 0.9900 . ?
 C18 H18B 0.9900 . ?
 C18 N3 1.520(8) . ?
 C19 Mn1 1.823(7) . ?
 C19 O2 1.121(8) . ?
 C20 Mn1 1.758(7) . ?
 C20 O1 1.178(8) . ?
 C21 Mn1 1.782(6) . ?
 C21 O3 1.147(7) . ?
 C22 H22 0.9500 . ?
 C22 C23 1.397(9) . ?
 C22 C27 1.372(9) . ?
 C23 H23 0.9500 . ?
 C23 C24 1.368(10) . ?
 C24 H24 0.9500 . ?
 C24 C25 1.369(11) . ?
 C25 H25 0.9500 . ?
 C25 C26 1.393(10) . ?
 C26 H26 0.9500 . ?
 C26 C27 1.411(8) . ?
 C27 C28 1.485(9) . ?
 C28 C29 1.429(8) . ?
 C28 C33 1.400(8) . ?
 C29 H29 0.9500 . ?
 C29 C30 1.366(10) . ?
 C30 H30 0.9500 . ?
 C30 C31 1.348(10) . ?
 C31 H31 0.9500 . ?
 C31 C32 1.376(9) . ?
 C32 C33 1.404(8) . ?
 C32 N5 1.391(8) . ?
 C33 N4 1.396(7) . ?
 C34 H34A 0.9800 . ?
 C34 H34B 0.9800 . ?
 C34 H34C 0.9800 . ?
 C34 N5 1.460(8) . ?
 C35 C36 1.480(8) . ?
 C35 N4 1.324(7) . ?
 C35 N5 1.355(7) . ?
 C36 H36 1.0000 . ?
 C36 C37 1.532(8) . ?
 C36 N6 1.508(7) . ?
 C37 H37A 0.9900 . ?
 C37 H37B 0.9900 . ?
 C37 C38 1.501(10) . ?
 C38 H38A 0.9900 . ?
 C38 H38B 0.9900 . ?
 C38 C39 1.521(9) . ?
 C39 H39A 0.9900 . ?
 C39 H39B 0.9900 . ?
 C39 N6 1.482(7) . ?
 C40 Mn2 1.785(8) . ?
 C40 O6 1.133(8) . ?
 C41 Mn2 1.816(6) . ?
 C41 O4 1.150(7) . ?
 C42 Mn2 1.778(7) . ?
 C42 O5 1.150(8) . ?
 Mn1 N1 2.099(4) . ?
 Mn1 N3 2.092(5) . ?
 Mn2 N4 2.099(5) . ?
 Mn2 N6 2.094(5) . ?
 N3 H3A 1.0000 . ?
 N6 H6A 1.0000 . ?

loop_
  _geom_angle_atom_site_label_1
  _geom_angle_atom_site_label_2
  _geom_angle_atom_site_label_3
  _geom_angle
  _geom_angle_site_symmetry_1
  _geom_angle_site_symmetry_3
  _geom_angle_publ_flag
 C2 C43 H43 120.1 . . ?
 C2 C43 C6 119.7(8) . . ?
 C6 C43 H43 120.1 . . ?
 C43 C2 H2 119.0 . . ?
 C43 C2 C3 122.1(9) . . ?
 C3 C2 H2 119.0 . . ?
 C2 C3 H3 119.8 . . ?
 C2 C3 C4 120.4(8) . . ?
 C4 C3 H3 119.8 . . ?
 C3 C4 C7 120.6(6) . . ?
 C5 C4 C3 117.7(6) . . ?
 C5 C4 C7 121.6(5) . . ?
 C4 C5 H5 120.5 . . ?
 C6 C5 C4 119.0(7) . . ?
 C6 C5 H5 120.5 . . ?
 C43 C6 H6 119.5 . . ?
 C5 C6 C43 121.1(8) . . ?
 C5 C6 H6 119.5 . . ?
 C8 C7 C4 120.1(6) . . ?
 C8 C7 C12 114.5(6) . . ?
 C12 C7 C4 125.4(5) . . ?
 C7 C8 H8 117.5 . . ?
 C9 C8 C7 125.1(7) . . ?
 C9 C8 H8 117.5 . . ?
 C8 C9 H9 119.2 . . ?
 C10 C9 C8 121.6(6) . . ?
 C10 C9 H9 119.2 . . ?
 C9 C10 H10 122.0 . . ?
 C9 C10 C11 116.1(6) . . ?
 C11 C10 H10 122.0 . . ?
 C12 C11 C10 121.5(6) . . ?
 N2 C11 C10 130.3(6) . . ?
 N2 C11 C12 108.1(5) . . ?
 C7 C12 C11 120.9(5) . . ?
 N1 C12 C7 132.6(5) . . ?
 N1 C12 C11 106.5(5) . . ?
 H13A C13 H13B 109.5 . . ?
 H13A C13 H13C 109.5 . . ?
 H13B C13 H13C 109.5 . . ?
 N2 C13 H13A 109.5 . . ?
 N2 C13 H13B 109.5 . . ?
 N2 C13 H13C 109.5 . . ?
 N1 C14 C15 124.2(5) . . ?
 N1 C14 N2 113.7(5) . . ?
 N2 C14 C15 121.9(5) . . ?
 C14 C15 H15 109.9 . . ?
 C14 C15 C16 114.5(5) . . ?
 C14 C15 N3 108.4(5) . . ?
 C16 C15 H15 109.9 . . ?
 N3 C15 H15 109.9 . . ?
 N3 C15 C16 103.9(5) . . ?
 C15 C16 H16A 110.9 . . ?
 C15 C16 H16B 110.9 . . ?
 H16A C16 H16B 109.0 . . ?
 C17 C16 C15 104.1(6) . . ?
 C17 C16 H16A 110.9 . . ?
 C17 C16 H16B 110.9 . . ?
 C16 C17 H17A 111.2 . . ?
 C16 C17 H17B 111.2 . . ?
 C16 C17 C18 103.0(6) . . ?
 H17A C17 H17B 109.1 . . ?
 C18 C17 H17A 111.2 . . ?
 C18 C17 H17B 111.2 . . ?
 C17 C18 H18A 110.9 . . ?
 C17 C18 H18B 110.9 . . ?
 C17 C18 N3 104.2(6) . . ?
 H18A C18 H18B 108.9 . . ?
 N3 C18 H18A 110.9 . . ?
 N3 C18 H18B 110.9 . . ?
 O2 C19 Mn1 173.6(6) . . ?
 O1 C20 Mn1 173.2(6) . . ?
 O3 C21 Mn1 177.4(7) . . ?
 C23 C22 H22 119.6 . . ?
 C27 C22 H22 119.6 . . ?
 C27 C22 C23 120.7(6) . . ?
 C22 C23 H23 119.7 . . ?
 C24 C23 C22 120.5(7) . . ?
 C24 C23 H23 119.7 . . ?
 C23 C24 H24 119.8 . . ?
 C25 C24 C23 120.4(7) . . ?
 C25 C24 H24 119.8 . . ?
 C24 C25 H25 120.2 . . ?
 C24 C25 C26 119.5(6) . . ?
 C26 C25 H25 120.2 . . ?
 C25 C26 H26 119.5 . . ?
 C25 C26 C27 121.0(7) . . ?
 C27 C26 H26 119.5 . . ?
 C22 C27 C26 117.9(6) . . ?
 C22 C27 C28 121.3(5) . . ?
 C26 C27 C28 120.8(6) . . ?
 C29 C28 C27 117.9(5) . . ?
 C33 C28 C27 126.4(5) . . ?
 C33 C28 C29 115.5(6) . . ?
 C28 C29 H29 118.6 . . ?
 C30 C29 C28 122.8(6) . . ?
 C30 C29 H29 118.6 . . ?
 C29 C30 H30 119.2 . . ?
 C31 C30 C29 121.6(6) . . ?
 C31 C30 H30 119.2 . . ?
 C30 C31 H31 121.3 . . ?
 C30 C31 C32 117.3(6) . . ?
 C32 C31 H31 121.3 . . ?
 C31 C32 C33 123.7(6) . . ?
 C31 C32 N5 130.3(6) . . ?
 N5 C32 C33 106.0(5) . . ?
 C28 C33 C32 118.9(5) . . ?
 N4 C33 C28 132.6(5) . . ?
 N4 C33 C32 108.4(5) . . ?
 H34A C34 H34B 109.5 . . ?
 H34A C34 H34C 109.5 . . ?
 H34B C34 H34C 109.5 . . ?
 N5 C34 H34A 109.5 . . ?
 N5 C34 H34B 109.5 . . ?
 N5 C34 H34C 109.5 . . ?
 N4 C35 C36 123.9(5) . . ?
 N4 C35 N5 112.7(5) . . ?
 N5 C35 C36 123.4(5) . . ?
 C35 C36 H36 109.0 . . ?
 C35 C36 C37 115.7(6) . . ?
 C35 C36 N6 108.3(5) . . ?
 C37 C36 H36 109.0 . . ?
 N6 C36 H36 109.0 . . ?
 N6 C36 C37 105.6(5) . . ?
 C36 C37 H37A 111.0 . . ?
 C36 C37 H37B 111.0 . . ?
 H37A C37 H37B 109.0 . . ?
 C38 C37 C36 103.9(6) . . ?
 C38 C37 H37A 111.0 . . ?
 C38 C37 H37B 111.0 . . ?
 C37 C38 H38A 111.5 . . ?
 C37 C38 H38B 111.5 . . ?
 C37 C38 C39 101.5(5) . . ?
 H38A C38 H38B 109.3 . . ?
 C39 C38 H38A 111.5 . . ?
 C39 C38 H38B 111.5 . . ?
 C38 C39 H39A 110.6 . . ?
 C38 C39 H39B 110.6 . . ?
 H39A C39 H39B 108.7 . . ?
 N6 C39 C38 105.7(5) . . ?
 N6 C39 H39A 110.6 . . ?
 N6 C39 H39B 110.6 . . ?
 O6 C40 Mn2 179.2(7) . . ?
 O4 C41 Mn2 173.9(6) . . ?
 O5 C42 Mn2 176.4(6) . . ?
 C19 Mn1 Br1 84.6(2) . . ?
 C19 Mn1 N1 99.9(2) . . ?
 C19 Mn1 N3 171.3(3) . . ?
 C20 Mn1 Br1 173.6(2) . . ?
 C20 Mn1 C19 90.5(3) . . ?
 C20 Mn1 C21 88.1(3) . . ?
 C20 Mn1 N1 97.8(2) . . ?
 C20 Mn1 N3 98.0(3) . . ?
 C21 Mn1 Br1 87.5(2) . . ?
 C21 Mn1 C19 87.8(3) . . ?
 C21 Mn1 N1 170.2(3) . . ?
 C21 Mn1 N3 91.2(3) . . ?
 N1 Mn1 Br1 87.21(13) . . ?
 N3 Mn1 Br1 86.73(15) . . ?
 N3 Mn1 N1 80.24(18) . . ?
 C40 Mn2 Br2 86.7(3) . . ?
 C40 Mn2 C41 88.9(3) . . ?
 C40 Mn2 N4 169.4(3) . . ?
 C40 Mn2 N6 90.2(3) . . ?
 C41 Mn2 Br2 85.6(2) . . ?
 C41 Mn2 N4 98.9(2) . . ?
 C41 Mn2 N6 171.1(2) . . ?
 C42 Mn2 Br2 175.9(2) . . ?
 C42 Mn2 C40 89.6(3) . . ?
 C42 Mn2 C41 92.4(3) . . ?
 C42 Mn2 N4 97.1(3) . . ?
 C42 Mn2 N6 96.5(2) . . ?
 N4 Mn2 Br2 86.72(13) . . ?
 N6 Mn2 Br2 85.51(13) . . ?
 N6 Mn2 N4 80.99(17) . . ?
 C12 N1 Mn1 139.0(4) . . ?
 C14 N1 C12 105.7(4) . . ?
 C14 N1 Mn1 110.5(4) . . ?
 C11 N2 C13 126.6(5) . . ?
 C14 N2 C11 105.9(5) . . ?
 C14 N2 C13 127.5(6) . . ?
 C15 N3 C18 107.7(5) . . ?
 C15 N3 Mn1 113.2(3) . . ?
 C15 N3 H3A 105.8 . . ?
 C18 N3 Mn1 117.5(4) . . ?
 C18 N3 H3A 105.8 . . ?
 Mn1 N3 H3A 105.8 . . ?
 C33 N4 Mn2 138.3(4) . . ?
 C35 N4 C33 105.9(4) . . ?
 C35 N4 Mn2 109.4(4) . . ?
 C32 N5 C34 125.6(5) . . ?
 C35 N5 C32 106.8(5) . . ?
 C35 N5 C34 127.3(6) . . ?
 C36 N6 Mn2 112.4(3) . . ?
 C36 N6 H6A 105.3 . . ?
 C39 N6 C36 106.4(5) . . ?
 C39 N6 Mn2 120.9(4) . . ?
 C39 N6 H6A 105.3 . . ?
 Mn2 N6 H6A 105.3 . . ?

loop_
  _geom_torsion_atom_site_label_1
  _geom_torsion_atom_site_label_2
  _geom_torsion_atom_site_label_3
  _geom_torsion_atom_site_label_4
  _geom_torsion
  _geom_torsion_site_symmetry_1
  _geom_torsion_site_symmetry_2
  _geom_torsion_site_symmetry_3
  _geom_torsion_site_symmetry_4
  _geom_torsion_publ_flag
 C43 C2 C3 C4 -1.9(14) . . . . ?
 C2 C43 C6 C5 1.2(13) . . . . ?
 C2 C3 C4 C5 1.1(11) . . . . ?
 C2 C3 C4 C7 178.1(8) . . . . ?
 C3 C4 C5 C6 0.8(10) . . . . ?
 C3 C4 C7 C8 -44.2(10) . . . . ?
 C3 C4 C7 C12 138.5(7) . . . . ?
 C4 C5 C6 C43 -2.0(11) . . . . ?
 C4 C7 C8 C9 -176.5(8) . . . . ?
 C4 C7 C12 C11 171.8(6) . . . . ?
 C4 C7 C12 N1 -5.1(11) . . . . ?
 C5 C4 C7 C8 132.7(7) . . . . ?
 C5 C4 C7 C12 -44.6(10) . . . . ?
 C6 C43 C2 C3 0.7(15) . . . . ?
 C7 C4 C5 C6 -176.2(6) . . . . ?
 C7 C8 C9 C10 2.8(15) . . . . ?
 C7 C12 N1 C14 175.0(7) . . . . ?
 C7 C12 N1 Mn1 -33.6(11) . . . . ?
 C8 C7 C12 C11 -5.6(10) . . . . ?
 C8 C7 C12 N1 177.5(7) . . . . ?
 C8 C9 C10 C11 -2.0(14) . . . . ?
 C9 C10 C11 C12 -2.6(12) . . . . ?
 C9 C10 C11 N2 -179.3(8) . . . . ?
 C10 C11 C12 C7 6.7(11) . . . . ?
 C10 C11 C12 N1 -175.7(7) . . . . ?
 C10 C11 N2 C13 -4.5(13) . . . . ?
 C10 C11 N2 C14 176.6(8) . . . . ?
 C11 C12 N1 C14 -2.3(7) . . . . ?
 C11 C12 N1 Mn1 149.2(5) . . . . ?
 C12 C7 C8 C9 1.1(12) . . . . ?
 C12 C11 N2 C13 178.4(7) . . . . ?
 C12 C11 N2 C14 -0.4(7) . . . . ?
 C14 C15 C16 C17 -143.0(6) . . . . ?
 C14 C15 N3 C18 122.6(6) . . . . ?
 C14 C15 N3 Mn1 -9.1(6) . . . . ?
 C15 C14 N1 C12 177.9(6) . . . . ?
 C15 C14 N1 Mn1 17.5(7) . . . . ?
 C15 C14 N2 C11 -177.0(6) . . . . ?
 C15 C14 N2 C13 4.1(10) . . . . ?
 C15 C16 C17 C18 39.8(8) . . . . ?
 C16 C15 N3 C18 0.4(7) . . . . ?
 C16 C15 N3 Mn1 -131.3(4) . . . . ?
 C16 C17 C18 N3 -39.7(8) . . . . ?
 C17 C18 N3 C15 24.0(8) . . . . ?
 C17 C18 N3 Mn1 153.3(5) . . . . ?
 C22 C23 C24 C25 -0.9(12) . . . . ?
 C22 C27 C28 C29 135.0(7) . . . . ?
 C22 C27 C28 C33 -39.2(10) . . . . ?
 C23 C22 C27 C26 -1.3(10) . . . . ?
 C23 C22 C27 C28 -178.6(6) . . . . ?
 C23 C24 C25 C26 -0.8(12) . . . . ?
 C24 C25 C26 C27 1.5(12) . . . . ?
 C25 C26 C27 C22 -0.5(10) . . . . ?
 C25 C26 C27 C28 176.8(7) . . . . ?
 C26 C27 C28 C29 -42.2(9) . . . . ?
 C26 C27 C28 C33 143.6(7) . . . . ?
 C27 C22 C23 C24 2.0(11) . . . . ?
 C27 C28 C29 C30 -177.2(7) . . . . ?
 C27 C28 C33 C32 173.0(6) . . . . ?
 C27 C28 C33 N4 -8.7(11) . . . . ?
 C28 C29 C30 C31 4.4(12) . . . . ?
 C28 C33 N4 C35 178.2(6) . . . . ?
 C28 C33 N4 Mn2 -34.7(10) . . . . ?
 C29 C28 C33 C32 -1.3(9) . . . . ?
 C29 C28 C33 N4 177.0(6) . . . . ?
 C29 C30 C31 C32 -2.4(12) . . . . ?
 C30 C31 C32 C33 -1.4(12) . . . . ?
 C30 C31 C32 N5 179.8(8) . . . . ?
 C31 C32 C33 C28 3.3(10) . . . . ?
 C31 C32 C33 N4 -175.4(7) . . . . ?
 C31 C32 N5 C34 2.2(13) . . . . ?
 C31 C32 N5 C35 176.5(8) . . . . ?
 C32 C33 N4 C35 -3.5(6) . . . . ?
 C32 C33 N4 Mn2 143.7(5) . . . . ?
 C33 C28 C29 C30 -2.4(10) . . . . ?
 C33 C32 N5 C34 -176.8(7) . . . . ?
 C33 C32 N5 C35 -2.5(7) . . . . ?
 C35 C36 C37 C38 -146.1(6) . . . . ?
 C35 C36 N6 C39 126.6(5) . . . . ?
 C35 C36 N6 Mn2 -7.8(6) . . . . ?
 C36 C35 N4 C33 -179.3(6) . . . . ?
 C36 C35 N4 Mn2 23.2(7) . . . . ?
 C36 C35 N5 C32 -178.4(6) . . . . ?
 C36 C35 N5 C34 -4.2(11) . . . . ?
 C36 C37 C38 C39 39.4(7) . . . . ?
 C37 C36 N6 C39 2.1(7) . . . . ?
 C37 C36 N6 Mn2 -132.3(4) . . . . ?
 C37 C38 C39 N6 -38.9(7) . . . . ?
 C38 C39 N6 C36 22.8(7) . . . . ?
 C38 C39 N6 Mn2 152.4(4) . . . . ?
 N1 C14 C15 C16 109.6(7) . . . . ?
 N1 C14 C15 N3 -5.9(8) . . . . ?
 N1 C14 N2 C11 -1.1(7) . . . . ?
 N1 C14 N2 C13 -180.0(6) . . . . ?
 N2 C11 C12 C7 -176.0(6) . . . . ?
 N2 C11 C12 N1 1.7(7) . . . . ?
 N2 C14 C15 C16 -74.9(8) . . . . ?
 N2 C14 C15 N3 169.6(5) . . . . ?
 N2 C14 N1 C12 2.1(7) . . . . ?
 N2 C14 N1 Mn1 -158.3(4) . . . . ?
 N3 C15 C16 C17 -24.9(7) . . . . ?
 N4 C35 C36 C37 107.6(7) . . . . ?
 N4 C35 C36 N6 -10.7(8) . . . . ?
 N4 C35 N5 C32 0.3(7) . . . . ?
 N4 C35 N5 C34 174.6(7) . . . . ?
 N5 C32 C33 C28 -177.7(6) . . . . ?
 N5 C32 C33 N4 3.7(7) . . . . ?
 N5 C35 C36 C37 -73.8(8) . . . . ?
 N5 C35 C36 N6 167.9(5) . . . . ?
 N5 C35 N4 C33 1.9(7) . . . . ?
 N5 C35 N4 Mn2 -155.5(4) . . . . ?
 N6 C36 C37 C38 -26.3(7) . . . . ?

_smtbx_masks_special_details       ?
loop_
  _smtbx_masks_void_nr
  _smtbx_masks_void_average_x
  _smtbx_masks_void_average_y
  _smtbx_masks_void_average_z
  _smtbx_masks_void_volume
  _smtbx_masks_void_count_electrons
  _smtbx_masks_void_content
 1 -0.374 -0.250 0.500 624.6 75.5 ?
 2 -0.253 0.250 0.000 624.6 74.3 ?

_smtbx_masks_void_probe_radius     1.2
_smtbx_masks_void_truncation_radius  1.2
_shelx_res_file
;
TITL 1_a.res in P2(1)2(1)2(1)
    1_a.res
    created by SHELXL-2018/3 at 18:24:06 on 29-Jul-2020
CELL 0.71073 13.1249 18.8575 20.0527 90 90 90
ZERR 8 0.001 0.0014 0.0015 0 0 0
LATT -1
SYMM 0.5-X,-Y,0.5+Z
SYMM -X,0.5+Y,0.5-Z
SYMM 0.5+X,0.5-Y,-Z
SFAC C H Br Mn N O
UNIT 168 152 8 8 24 24

L.S. 20
PLAN  18
SIZE 0.3 0.2 0.2
TEMP -120
CONF
BOND $H
MORE -1
fmap 2
acta
ABIN
MERG 2
TWIN -1 0 0 0 -1 0 0 0 -1 2
OMIT -3 50
OMIT -1 7 2
OMIT 0 7 1
OMIT 0 0 2
OMIT 4 3 2
OMIT 4 0 10
OMIT 0 3 7
OMIT 3 4 0
REM <olex2.extras>
REM <HklSrc "%.\\1_a.hkl">
REM </olex2.extras>

WGHT    0.044500
BASF   0.04498
FVAR       2.37559
BR1   3    0.664720    0.537125    0.618883    11.00000    0.02679    0.03966 =
         0.04364    0.00817    0.00470    0.00107
BR2   3    0.664345    0.649697    0.092141    11.00000    0.03182    0.04293 =
         0.07090    0.02206    0.01115   -0.00305
C43   1    0.213820    0.659801    0.737712    11.00000    0.04378    0.11731 =
         0.07203   -0.05646   -0.00537    0.01910
AFIX  43
H43   2    0.190392    0.682190    0.777284    11.00000   -1.20000
AFIX   0
C2    1    0.241472    0.698649    0.685421    11.00000    0.06116    0.06974 =
         0.12158   -0.05523   -0.00607    0.03037
AFIX  43
H2    2    0.238113    0.748862    0.688554    11.00000   -1.20000
AFIX   0
C3    1    0.274321    0.668836    0.627757    11.00000    0.03991    0.03994 =
         0.08458   -0.01361   -0.00920    0.00484
AFIX  43
H3    2    0.291562    0.698163    0.590927    11.00000   -1.20000
AFIX   0
C4    1    0.283014    0.594642    0.622174    11.00000    0.02283    0.03663 =
         0.05224   -0.01086    0.00191   -0.00054
C5    1    0.255007    0.553440    0.677579    11.00000    0.02640    0.05747 =
         0.03261   -0.00737   -0.00349   -0.00943
AFIX  43
H5    2    0.260518    0.503231    0.676144    11.00000   -1.20000
AFIX   0
C6    1    0.219287    0.587048    0.734255    11.00000    0.02781    0.10501 =
         0.04500   -0.03072    0.00405   -0.00842
AFIX  43
H6    2    0.198186    0.559439    0.771397    11.00000   -1.20000
AFIX   0
C7    1    0.315032    0.562365    0.559980    11.00000    0.03506    0.03546 =
         0.03849    0.00867    0.00466    0.00527
C8    1    0.274642    0.585875    0.499919    11.00000    0.05038    0.05629 =
         0.04740    0.01432   -0.00854    0.01677
AFIX  43
H8    2    0.229109    0.625004    0.501391    11.00000   -1.20000
AFIX   0
C9    1    0.295405    0.556958    0.438571    11.00000    0.10798    0.07916 =
         0.02747    0.02085   -0.00456    0.03597
AFIX  43
H9    2    0.266603    0.577941    0.399845    11.00000   -1.20000
AFIX   0
C10   1    0.356581    0.498650    0.431874    11.00000    0.06525    0.10399 =
         0.01752    0.00657   -0.00835    0.02174
AFIX  43
H10   2    0.369541    0.477537    0.389705    11.00000   -1.20000
AFIX   0
C11   1    0.399782    0.471402    0.491941    11.00000    0.04560    0.06197 =
         0.02348   -0.00195    0.00203    0.00810
C12   1    0.383401    0.504926    0.554066    11.00000    0.03836    0.03209 =
         0.01838    0.00292   -0.00301    0.00162
C13   1    0.498647    0.364924    0.451019    11.00000    0.05855    0.08474 =
         0.03130   -0.03302   -0.00139    0.01466
AFIX 137
H13A  2    0.505233    0.389227    0.408037    11.00000   -1.50000
H13B  2    0.449294    0.326170    0.446923    11.00000   -1.50000
H13C  2    0.564975    0.345653    0.464259    11.00000   -1.50000
AFIX   0
C14   1    0.485242    0.415559    0.567796    11.00000    0.02231    0.03881 =
         0.02464    0.00063   -0.00182   -0.00169
C15   1    0.556462    0.364379    0.597251    11.00000    0.02035    0.03545 =
         0.04873   -0.00247   -0.00471    0.00107
AFIX  13
H15   2    0.620956    0.363108    0.570727    11.00000   -1.20000
AFIX   0
C16   1    0.512297    0.286826    0.605051    11.00000    0.04565    0.02834 =
         0.08267   -0.00349   -0.01592   -0.00081
AFIX  23
H16A  2    0.436926    0.287539    0.606869    11.00000   -1.20000
H16B  2    0.534112    0.256256    0.567540    11.00000   -1.20000
AFIX   0
C17   1    0.555889    0.261394    0.669087    11.00000    0.06419    0.04548 =
         0.09076    0.02213   -0.00211    0.00026
AFIX  23
H17A  2    0.627287    0.245604    0.663343    11.00000   -1.20000
H17B  2    0.515235    0.221834    0.687672    11.00000   -1.20000
AFIX   0
C18   1    0.549893    0.325753    0.712864    11.00000    0.05899    0.04787 =
         0.06021    0.02882    0.00729    0.00982
AFIX  23
H18A  2    0.598188    0.322045    0.750627    11.00000   -1.20000
H18B  2    0.480135    0.332057    0.730684    11.00000   -1.20000
AFIX   0
C19   1    0.487522    0.580010    0.703341    11.00000    0.03410    0.04532 =
         0.03236   -0.01085   -0.00128   -0.01181
C20   1    0.424842    0.460535    0.745706    11.00000    0.04026    0.07451 =
         0.02728    0.00169   -0.00737   -0.02204
C21   1    0.604656    0.494434    0.759894    11.00000    0.04510    0.06125 =
         0.02848    0.00728   -0.00618   -0.01587

C22   1    0.266569    0.674893    0.182659    11.00000    0.03758    0.02865 =
         0.04919   -0.00144    0.00149    0.00666
AFIX  43
H22   2    0.273853    0.624795    0.181178    11.00000   -1.20000
AFIX   0
C23   1    0.239573    0.707843    0.242528    11.00000    0.04143    0.07096 =
         0.04806   -0.00436    0.00575    0.00472
AFIX  43
H23   2    0.230782    0.680135    0.281673    11.00000   -1.20000
AFIX   0
C24   1    0.225705    0.779682    0.245206    11.00000    0.04570    0.05983 =
         0.06817   -0.03173    0.00272    0.00831
AFIX  43
H24   2    0.206390    0.801454    0.286015    11.00000   -1.20000
AFIX   0
C25   1    0.239512    0.820383    0.189380    11.00000    0.04123    0.03742 =
         0.09817   -0.02825    0.00872    0.00006
AFIX  43
H25   2    0.228999    0.870190    0.191186    11.00000   -1.20000
AFIX   0
C26   1    0.269084    0.788211    0.129934    11.00000    0.03200    0.03350 =
         0.07870    0.00901    0.00759   -0.00428
AFIX  43
H26   2    0.280269    0.816582    0.091476    11.00000   -1.20000
AFIX   0
C27   1    0.282677    0.714118    0.125977    11.00000    0.02620    0.02359 =
         0.05827    0.00329    0.01081    0.00522
C28   1    0.309029    0.679649    0.061678    11.00000    0.02219    0.03615 =
         0.04553    0.01367   -0.00030    0.00213
C29   1    0.257425    0.703315    0.003018    11.00000    0.03500    0.04393 =
         0.04457    0.01956   -0.00288    0.00668
AFIX  43
H29   2    0.210548    0.741495    0.006748    11.00000   -1.20000
AFIX   0
C30   1    0.272654    0.673350   -0.058219    11.00000    0.05584    0.06596 =
         0.04585    0.02478   -0.01199    0.01488
AFIX  43
H30   2    0.240003    0.693347   -0.096088    11.00000   -1.20000
AFIX   0
C31   1    0.332930    0.616068   -0.066166    11.00000    0.05769    0.07571 =
         0.03017    0.00044    0.00017    0.01359
AFIX  43
H31   2    0.341291    0.594264   -0.108522    11.00000   -1.20000
AFIX   0
C32   1    0.381828    0.590475   -0.010467    11.00000    0.03185    0.04512 =
         0.03885   -0.00078   -0.00472    0.01247
C33   1    0.373915    0.621458    0.053001    11.00000    0.03033    0.02328 =
         0.02777    0.00077   -0.00307   -0.00395
C34   1    0.482470    0.486919   -0.057015    11.00000    0.06187    0.09544 =
         0.04083   -0.02640   -0.00440    0.02044
AFIX 137
H34A  2    0.433086    0.448600   -0.063733    11.00000   -1.50000
H34B  2    0.548803    0.466653   -0.045173    11.00000   -1.50000
H34C  2    0.489014    0.514495   -0.098216    11.00000   -1.50000
AFIX   0
C35   1    0.479254    0.533091    0.061030    11.00000    0.02636    0.03608 =
         0.02947    0.00372   -0.00683    0.00081
C36   1    0.552557    0.480922    0.088228    11.00000    0.03613    0.03715 =
         0.03196    0.00242    0.00318    0.00638
AFIX  13
H36   2    0.612933    0.478167    0.057921    11.00000   -1.20000
AFIX   0
C37   1    0.510647    0.406017    0.099434    11.00000    0.03691    0.02664 =
         0.09612    0.00090   -0.00761    0.00278
AFIX  23
H37A  2    0.436214    0.407147    0.107364    11.00000   -1.20000
H37B  2    0.524872    0.375200    0.060565    11.00000   -1.20000
AFIX   0
C38   1    0.566439    0.380394    0.160182    11.00000    0.03787    0.03695 =
         0.06614    0.02077    0.00084   -0.00095
AFIX  23
H38A  2    0.636053    0.364075    0.148966    11.00000   -1.20000
H38B  2    0.529078    0.341548    0.182652    11.00000   -1.20000
AFIX   0
C39   1    0.568802    0.447068    0.202827    11.00000    0.05234    0.04103 =
         0.04563    0.02156    0.00521   -0.00273
AFIX  23
H39A  2    0.503197    0.453461    0.226438    11.00000   -1.20000
H39B  2    0.624178    0.444290    0.236247    11.00000   -1.20000
AFIX   0
C40   1    0.632872    0.619095    0.238197    11.00000    0.05511    0.03540 =
         0.05779   -0.00877   -0.01588   -0.00055
C41   1    0.504446    0.702256    0.186814    11.00000    0.02835    0.03831 =
         0.04770   -0.00901   -0.00408    0.00027
C42   1    0.448395    0.583898    0.241482    11.00000    0.05101    0.04483 =
         0.02853    0.00370   -0.00393    0.00287

MN1   4    0.521127    0.487265    0.690159    11.00000    0.02842    0.03769 =
         0.02142   -0.00071   -0.00193   -0.00650
MN2   4    0.534698    0.608849    0.177319    11.00000    0.02810    0.03049 =
         0.03171    0.00176   -0.00312   -0.00331
N1    5    0.442260    0.467783    0.600960    11.00000    0.02625    0.02817 =
         0.02578   -0.00002   -0.00109    0.00228
N2    5    0.463257    0.415574    0.501845    11.00000    0.04001    0.04924 =
         0.02577   -0.00616   -0.00121    0.01183
N3    5    0.578644    0.386764    0.667041    11.00000    0.03732    0.03539 =
         0.04261    0.01025   -0.01023   -0.00502
AFIX  13
H3A   2    0.654452    0.391056    0.669981    11.00000   -1.20000
AFIX   0

N4    5    0.439207    0.585518    0.096298    11.00000    0.02411    0.02299 =
         0.02789   -0.00059    0.00112   -0.00184
N5    5    0.447479    0.533103   -0.003280    11.00000    0.04071    0.04842 =
         0.03277   -0.00432   -0.00069    0.01448
N6    5    0.586981    0.506439    0.155865    11.00000    0.02350    0.03367 =
         0.02802    0.00728    0.00277   -0.00358
AFIX  13
H6A   2    0.662748    0.510775    0.152546    11.00000   -1.20000
AFIX   0

O1    6    0.364348    0.447624    0.787386    11.00000    0.06144    0.08597 =
         0.02887   -0.00123    0.00339   -0.02082
O2    6    0.475233    0.637648    0.714376    11.00000    0.04708    0.05906 =
         0.08207   -0.03797   -0.00442   -0.00565
O3    6    0.656022    0.501028    0.805770    11.00000    0.06888    0.07166 =
         0.04632   -0.00587   -0.03010   -0.01080
O4    6    0.493610    0.762038    0.195537    11.00000    0.04264    0.03912 =
         0.09717   -0.02446   -0.01098   -0.00455
O5    6    0.395631    0.569868    0.285297    11.00000    0.07151    0.08394 =
         0.04281    0.01804    0.03002    0.01605
O6    6    0.695178    0.626411    0.276660    11.00000    0.09275    0.05917 =
         0.09424   -0.01375   -0.06321    0.00952
HKLF 4


REM  1_a.res in P2(1)2(1)2(1)
REM wR2 = 0.0964, GooF = S = 1.098, Restrained GooF = 1.098 for all data
REM R1 = 0.0389 for 7571 Fo > 4sig(Fo) and 0.0458 for all 8715 data
REM 526 parameters refined using 0 restraints

END

WGHT      0.0435      0.0726

REM Highest difference peak  1.044,  deepest hole -0.492,  1-sigma level  0.063
Q1    1   0.6610  0.6235  0.0527  11.00000  0.05    1.04
Q2    1   0.7193  0.3801 -0.0557  11.00000  0.05    0.43
Q3    1   0.7552  0.5308 -0.0462  11.00000  0.05    0.40
Q4    1   0.5866  0.6426  0.0875  11.00000  0.05    0.32
Q5    1   0.7469  0.6485  0.0901  11.00000  0.05    0.31
Q6    1   0.4584  0.6054  0.1805  11.00000  0.05    0.30
Q7    1   0.6616  0.5524  0.6596  11.00000  0.05    0.28
Q8    1   0.7040  0.5772  0.5888  11.00000  0.05    0.27
Q9    1   0.5165  0.5607  0.1962  11.00000  0.05    0.24
Q10   1   0.3717  0.5423  0.4432  11.00000  0.05    0.24
Q11   1   0.3418  0.5854  0.0391  11.00000  0.05    0.24
Q12   1   0.5984  0.5380  0.6176  11.00000  0.05    0.24
Q13   1   0.2048  0.5383  0.7597  11.00000  0.05    0.23
Q14   1   0.7432  0.5383  0.6229  11.00000  0.05    0.22
Q15   1   0.3785  0.5546  0.3027  11.00000  0.05    0.22
Q16   1   0.4607  0.5412  0.0174  11.00000  0.05    0.22
Q17   1   0.4122  0.5165  0.6727  11.00000  0.05    0.21
Q18   1   0.4049  0.4863  0.0225  11.00000  0.05    0.21
;
_shelx_res_checksum                37693
_shelx_hkl_file
;
 -12   0   0   26960    1920                                                       24628   -3.16    0.01  1.0000
 -14   0   0    8437    1120                                                        6519    4.83    0.03  1.0000
  -1  -1   0   58672    3670                                                       57874   -0.02    0.71  1.0000
  -1   1   0   57558    3840                                                       56834    0.01    0.66  1.0000
   1  -1   0   59077    3670                                                       58344    0.01   -0.66  1.0000
   1   1   0   59296    3850                                                       58494   -0.02   -0.71  1.0000
  -2  -1   0    1612     790                                                       11499   31.76    0.00  1.0000
  -3  -1   0   17582    1120                                                       16608    0.00    1.61  1.0000
  -8  -1   0   68303    4700                                                       71963    2.98    0.00  1.0000
  -9  -1   0   12527    1080                                                       12619    0.02   -0.18  1.0000
 -10  -1   0   11822     870                                                        8229    7.80   -0.01  1.0000
 -11  -1   0   24157    1850                                                       24178   -0.01    0.03  1.0000
 -12  -1   0     483     510                                                         390   -0.96    0.00  1.0000
 -13   1   0   46064    3350                                                       46335    0.00   -0.27  1.0000
 -13  -1   0   42746    3160                                                       43036   -0.01   -0.30  1.0000
 -13   1   0   44061    3170                                                       44326    0.00   -0.27  1.0000
 -14   1   0    5868     960                                                        4490    4.18    0.00  1.0000
 -14  -1   0    5617     950                                                        4280   -4.15    0.00  1.0000
 -15  -1   0    4691    1040                                                        4750    0.02   -0.19  1.0000
   0   2   0 1344863   30497                                                      462794 -206.40    0.05  1.0000
  -1  -2   0  105585    7159                                                      114069   -0.01    5.52  1.0000
   1  -2   0  104399    7159                                                      113019    0.01    5.64  1.0000
   1   2   0  103104    7519                                                      111489   -0.01   -5.52  1.0000
  -1   2   0  106014    7499                                                      114699    0.01   -5.64  1.0000
   2  -2   0  216839    6209                                                       98720  -65.19   -0.02  1.0000
  -2  -2   0  215135    6209                                                       97700  -65.10   -0.01  1.0000
  -2   2   0  216780    6499                                                       98680  -65.19    0.02  1.0000
   2   2   0  214631    6519                                                       97360  -65.10    0.01  1.0000
   3   2   0  415212   26827                                                      411659    0.01   -1.19  1.0000
  -3  -2   0  404607   25587                                                      401100    0.01    1.19  1.0000
  -4  -2   0  138542   11959                                                      188991  -26.91   -0.02  1.0000
  -5  -2   0   81695    5329                                                       83122   -0.01    1.07  1.0000
  -6  -2   0   33146    1930                                                       28397   -5.86   -0.01  1.0000
  -7  -2   0   34515    2370                                                       34987   -0.03    0.54  1.0000
  -8  -2   0    3523     430                                                        2280    5.00   -0.02  1.0000
  -9  -2   0   47739    3090                                                       45555    0.00    2.19  1.0000
 -10  -2   0    3536     480                                                        1550    8.72   -0.01  1.0000
 -11  -2   0       9     410                                                        -510   -0.02   -1.30  1.0000
 -12  -2   0    2550     670                                                        3130    2.39   -0.01  1.0000
 -13   2   0      82     620                                                          80    0.02   -0.30  1.0000
 -13  -2   0     242     570                                                         240   -0.05    0.34  1.0000
 -14  -2   0    2804     930                                                        3840   -3.89   -0.02  1.0000
 -15  -2   0   29739    2470                                                       28347    0.00    1.77  1.0000
  -1  -3   0   13655     950                                                       14369    0.01   -1.30  1.0000
   1   3   0   13538    1030                                                       14249    0.01    1.30  1.0000
   1  -3   0   13710     950                                                       14509   -0.01    1.45  1.0000
  -1   3   0   12990     990                                                       13769   -0.01   -1.45  1.0000
  -2  -3   0    7568     300                                                        3560  -11.94    0.00  1.0000
   2  -3   0    7044     280                                                        3230   11.84    0.01  1.0000
  -2   3   0    6537     300                                                        2890   11.84   -0.01  1.0000
   2   3   0    7334     350                                                        3400  -11.94    0.00  1.0000
   3  -3   0   92762    5489                                                       85931    0.01    4.92  1.0000
  -3  -3   0   94232    5489                                                       87541   -0.01   -4.78  1.0000
   3   3   0   88991    5769                                                       82492   -0.01    4.78  1.0000
  -3   3   0   95370    5739                                                       88441    0.01   -4.92  1.0000
  -4   3   0   43299    5039                                                       75352   28.65   -0.01  1.0000
  -4  -3   0   44268    4820                                                       76592  -28.62    0.00  1.0000
   4   3   0   42124    5069                                                       73763  -28.62    0.00  1.0000
  -5   3   0    2460     300                                                        2140    0.00    1.44  1.0000
  -5  -3   0    2172     290                                                        1860    0.02    1.50  1.0000
  -6  -3   0    1107     780                                                        9399  -27.48    0.01  1.0000
  -7  -3   0    3495     430                                                        2940    0.01   -2.11  1.0000
  -8  -3   0   83611    5449                                                       83772    0.12    0.01  1.0000
  -9  -3   0     215     320                                                         160   -0.01    0.86  1.0000
 -10  -3   0    5237     830                                                        7579   -6.39    0.01  1.0000
 -11  -3   0    2640     580                                                        2680    0.02   -0.16  1.0000
 -12  -3   0     872     510                                                         720   -1.16    0.00  1.0000
 -12   3   0     274     550                                                         190    1.19    0.02  1.0000
 -13   3   0    4505     810                                                        4310    0.02    0.63  1.0000
 -13  -3   0    3566     750                                                        3390    0.00    0.64  1.0000
 -14   3   0    6233    1100                                                        7709   -3.84    0.01  1.0000
 -15  -3   0    2530    1040                                                        2620   -0.01   -0.38  1.0000
 -15   3   0    2510     880                                                        2600    0.00   -0.39  1.0000
   0  -4   0    2307    2830                                                       45925  112.83   -0.01  1.0000
   0   4   0    3392    2990                                                       41636  112.83    0.01  1.0000
   1  -4   0    4988     300                                                        2810   -0.01   -7.59  1.0000
  -1  -4   0    5021     290                                                        2820    0.00   -7.65  1.0000
   1   4   0    6098     400                                                        3640    0.00    7.65  1.0000
  -1   4   0    6205     350                                                        3740   -0.01    7.59  1.0000
  -2  -4   0   23596    3290                                                       49305   29.46   -0.01  1.0000
   2   4   0   24588    3500                                                       50735   29.46    0.01  1.0000
   2  -4   0   23794    3300                                                       49785   29.65   -0.01  1.0000
  -2   4   0   27816    3460                                                       55534   29.65    0.01  1.0000
   3   4   0    8858     790                                                        9389    0.03    1.20  1.0000
   3  -4   0    7803     680                                                        8379    0.02   -1.38  1.0000
  -3   4   0   10086     730                                                       10739    0.02    1.38  1.0000
  -3  -4   0    8217     690                                                        8729    0.03   -1.20  1.0000
   4   4   0    1077     210                                                         200   20.13   -0.01  1.0000
  -4   4   0     870     170                                                         310   20.16    0.01  1.0000
  -4  -4   0     761     180                                                         380   20.13    0.01  1.0000
  -5  -4   0     178     210                                                         470    0.01   -3.60  1.0000
  -5   4   0     400     230                                                         800    0.01    3.57  1.0000
   5   4   0     301     290                                                         660    0.01    3.60  1.0000
  -6   4   0     822     260                                                         320    4.66    0.00  1.0000
  -6  -4   0     874     240                                                         350    4.68   -0.02  1.0000
  -7  -4   0     490     270                                                         450    0.02   -0.39  1.0000
  -7   4   0     148     270                                                         130    0.01    0.33  1.0000
  -8  -4   0   20803    1340                                                       17358   -5.38    0.05  1.0000
  -8   4   0   21770    1430                                                       18298   -5.28   -0.15  1.0000
  -9   4   0   10703    1090                                                       11679   -0.01    1.99  1.0000
  -9  -4   0   10317    1030                                                       11289    0.00   -2.02  1.0000
 -10  -4   0    5208     600                                                        3400   -5.99    0.02  1.0000
 -10   4   0    4768     590                                                        3050   -5.98   -0.01  1.0000
 -11   4   0      18     440                                                         -60   -0.01   -1.83  1.0000
 -11  -4   0      65     470                                                         150    0.01    1.80  1.0000
 -11   4   0     264     490                                                         420   -0.01   -1.83  1.0000
 -12  -4   0    9676     990                                                        9099   -1.28   -0.01  1.0000
 -12   4   0    8306     970                                                        7769   -1.29    0.01  1.0000
 -13   4   0    1225     650                                                        1180   -0.01   -0.28  1.0000
 -13  -4   0    1914     630                                                        1870    0.04    0.22  1.0000
 -14   4   0     273     700                                                         500    2.54    0.01  1.0000
 -15  -4   0     311     860                                                         400    0.01   -1.02  1.0000
   1   5   0   10138     950                                                       10139    0.00    0.00  1.0000
   1  -5   0    9077     670                                                        8999    0.01   -0.18  1.0000
  -1  -5   0   10288     720                                                       10289    0.00    0.00  1.0000
   1  -5   0    9990     730                                                        9909    0.01   -0.18  1.0000
  -1   5   0   10442     820                                                       10359    0.01    0.18  1.0000
   2  -5   0     417     220                                                        1150    5.83   -0.01  1.0000
   2   5   0     630     340                                                        1470   -5.73    0.01  1.0000
  -2  -5   0     722     230                                                        1610   -5.73   -0.01  1.0000
   3   5   0   20142    1270                                                       16528    0.02   -5.75  1.0000
  -3  -5   0   21035    1150                                                       17338    0.02    5.75  1.0000
  -3   5   0   19875    1110                                                       16328   -0.02    5.68  1.0000
   3  -5   0   21472    1160                                                       17778   -0.02   -5.68  1.0000
  -3   5   0   18825    1200                                                       15378   -0.02    5.68  1.0000
   4   5   0      64     300                                                        1000   16.78   -0.03  1.0000
  -4   5   0      88     220                                                         930  -16.97    0.04  1.0000
  -4  -5   0      22     250                                                        1260   16.78    0.03  1.0000
   4  -5   0     113     230                                                         850  -16.97   -0.04  1.0000
  -5   5   0   15573    1120                                                       14739    0.01   -1.46  1.0000
  -5  -5   0   15893    1070                                                       15038    0.00   -1.48  1.0000
   5   5   0   14897    1170                                                       14069    0.00    1.48  1.0000
  -6  -5   0   13562     510                                                        4850   20.17    0.00  1.0000
  -6   5   0   11558     490                                                        3690  -20.14   -0.02  1.0000
  -7   5   0    7764     760                                                        7529    0.03    0.58  1.0000
  -7  -5   0    7265     710                                                        7039   -0.02    0.58  1.0000
  -8   5   0    7031     940                                                        9209    5.22   -0.01  1.0000
  -8  -5   0    8207     910                                                       10529   -5.18   -0.01  1.0000
  -9  -5   0    1153     410                                                        1520   -0.01   -2.17  1.0000
  -9   5   0     836     430                                                        1150    0.00   -2.15  1.0000
 -10  -5   0    4058     550                                                        2740    4.89    0.01  1.0000
 -10   5   0    4270     580                                                        2910   -4.92    0.02  1.0000
 -10   5   0    3387     510                                                        2190   -4.92    0.02  1.0000
 -11  -5   0     923     480                                                         930    0.01    0.43  1.0000
 -11   5   0       1     480                                                        -180   -0.05    0.46  1.0000
 -12   5   0    3545     670                                                        2900   -2.45   -0.02  1.0000
 -12  -5   0    4084     680                                                        3390    2.45    0.00  1.0000
 -13   5   0    5475     900                                                        5499   -0.01   -0.07  1.0000
 -13  -5   0    6185     890                                                        6209    0.00   -0.07  1.0000
 -14   5   0     651     710                                                        1020    2.80   -0.02  1.0000
 -15  -5   0    3617    1080                                                        3230   -0.01    1.43  1.0000
   0  -6   0   90452    2980                                                       45975  -37.35    0.07  1.0000
   0   6   0   90336    3180                                                       45875  -37.35   -0.07  1.0000
  -1  -6   0   51349    2720                                                       42026    0.03    9.30  1.0000
  -1   6   0   51571    2880                                                       42546    0.03   -8.96  1.0000
   1  -6   0   52275    2760                                                       43186    0.03    8.96  1.0000
   1   6   0   50154    2920                                                       40946    0.03   -9.30  1.0000
   1  -6   0   48837    2720                                                       40066    0.03    8.96  1.0000
   2   6   0   44907    2550                                                       40046    5.08   -0.01  1.0000
  -2   6   0   48336    2750                                                       43366    5.00   -0.02  1.0000
   2   6   0   42788    2800                                                       38046    5.08   -0.01  1.0000
   2  -6   0   42680    2610                                                       38016    5.00    0.02  1.0000
  -2  -6   0   44876    2610                                                       40016    5.08    0.01  1.0000
  -3   6   0   53388    3570                                                       51045   -0.03   -2.21  1.0000
   3  -6   0   55433    3420                                                       53045   -0.03    2.21  1.0000
   3   6   0   55269    3650                                                       53175   -0.06   -1.94  1.0000
  -3  -6   0   55371    3420                                                       53275   -0.06    1.94  1.0000
   4  -6   0   16271    1230                                                       17748   -2.45    0.03  1.0000
   4   6   0   15612    1350                                                       17038   -2.41   -0.01  1.0000
  -4  -6   0   15498    1220                                                       16918   -2.41    0.01  1.0000
  -4   6   0   15350    1280                                                       16788   -2.45   -0.03  1.0000
  -4   6   0   15685    1150                                                       17138   -2.45   -0.03  1.0000
   5  -6   0    1596     390                                                        2930    0.02    6.10  1.0000
   5   6   0    1323     470                                                        2580    0.02   -6.21  1.0000
  -5  -6   0    1323     380                                                        2580    0.02    6.21  1.0000
  -5   6   0    1428     260                                                        2700    0.02   -6.10  1.0000
  -5   6   0    1106     360                                                        2250    0.02   -6.10  1.0000
   6   6   0   21616    1490                                                       18218   -5.22   -0.03  1.0000
  -6  -6   0   23252    1350                                                       19728   -5.22    0.03  1.0000
  -6  -6   0   21414    1200                                                       18038   -5.22    0.03  1.0000
  -6   6   0   21893    1290                                                       18478   -5.22    0.00  1.0000
  -6   6   0   20530    1370                                                       17228   -5.22    0.00  1.0000
  -7  -6   0    7762     730                                                        7749    0.00    0.03  1.0000
  -7   6   0    6875     630                                                        6889    0.00    0.04  1.0000
  -7   6   0    7334     740                                                        7349    0.00    0.04  1.0000
  -8   6   0      41     350                                                          50    0.78    0.20  1.0000
  -8  -6   0      12     340                                                          20    0.88   -0.07  1.0000
  -8   6   0     378     280                                                         410    0.78    0.20  1.0000
  -9   6   0     283     310                                                         280   -0.02   -0.52  1.0000
  -9  -6   0       1     360                                                        -300   -0.03    0.44  1.0000
  -9   6   0     162     360                                                         160   -0.02   -0.52  1.0000
 -10   6   0    3677     560                                                        2630    4.05    0.04  1.0000
 -10  -6   0    2165     500                                                        1380    4.07   -0.03  1.0000
 -11  -6   0    8399     890                                                        7549    0.00   -2.05  1.0000
 -11   6   0    8850     930                                                        7969    0.01    2.07  1.0000
 -12   6   0   20750    1810                                                       21188    0.66   -0.02  1.0000
 -12  -6   0   20775    1730                                                       21228    0.68    0.01  1.0000
 -13   6   0    7833    1040                                                        7589    0.01    0.60  1.0000
 -13  -6   0    9019    1030                                                        8779   -0.01   -0.55  1.0000
 -14   6   0     451     690                                                         670   -2.00   -0.02  1.0000
 -15  -6   0     779     960                                                         790   -0.02    0.09  1.0000
  -1   7   0  299502   19368                                                      293291    0.02    2.46  1.0000
   1  -7   0  306574   19088                                                      300290    0.02   -2.46  1.0000
   1  -7   0  294742   18458                                                      288581    0.02   -2.46  1.0000
   1   7   0  295444   19408                                                      289521   -0.01   -2.36  1.0000
  -1  -7   0  294949   18458                                                      289031   -0.01    2.36  1.0000
   2  -7   0   98827    7679                                                      121438  -14.71    0.00  1.0000
   2   7   0   93861    7619                                                      115848   14.66   -0.01  1.0000
  -2  -7   0  102193    7679                                                      125087   14.66    0.01  1.0000
   2   7   0   98953    8119                                                      121498   14.66   -0.01  1.0000
  -2   7   0   96717    8059                                                      119098  -14.71    0.00  1.0000
  -3  -7   0   11582     950                                                       13309   -0.02   -3.34  1.0000
   3   7   0   11023    1080                                                       12709   -0.02    3.34  1.0000
  -3   7   0    9818     960                                                       11269    0.03   -3.04  1.0000
   3  -7   0   10800     930                                                       12319    0.03    3.04  1.0000
  -4   7   0   63315    4250                                                       62994   -0.27   -0.04  1.0000
   4   7   0   62546    4330                                                       62124    0.36    0.04  1.0000
  -4  -7   0   65416    4070                                                       64993    0.36   -0.04  1.0000
   4  -7   0   60367    4080                                                       60064   -0.27    0.04  1.0000
  -5   7   0    1082     290                                                         690    0.00    3.41  1.0000
   5  -7   0     743     270                                                         490    0.00   -3.41  1.0000
  -5   7   0     982     140                                                         610    0.00    3.41  1.0000
  -5  -7   0    1057     260                                                         670   -0.02    3.43  1.0000
   5   7   0     410     370                                                         220   -0.02   -3.43  1.0000
   6   7   0   54962    4230                                                       59894   -4.43    0.00  1.0000
  -6   7   0   55730    4140                                                       60744    4.48    0.02  1.0000
  -6  -7   0   59065    3970                                                       64174   -4.43    0.00  1.0000
  -6   7   0   52838    4000                                                       57724    4.48    0.02  1.0000
  -7   7   0   27552    1900                                                       26237   -0.04    1.73  1.0000
  -7  -7   0   30302    1950                                                       28837    0.02    1.84  1.0000
  -7   7   0   30532    2040                                                       29147   -0.04    1.73  1.0000
   7   7   0   28662    2150                                                       27237    0.02   -1.84  1.0000
  -8   7   0     119     370                                                         990  -10.50    0.03  1.0000
  -8  -7   0      80     380                                                         820   10.47    0.03  1.0000
  -9  -7   0    2540     490                                                        1990    0.01    2.50  1.0000
  -9   7   0    3044     490                                                        2440   -0.01    2.50  1.0000
 -10   7   0   63601    4820                                                       66183    2.19   -0.03  1.0000
 -10  -7   0   70594    4650                                                       73333   -2.20   -0.02  1.0000
 -11   7   0    4084     690                                                        3800    0.03   -0.98  1.0000
 -11  -7   0    3477     650                                                        3210   -0.01   -1.01  1.0000
 -12  -7   0   12036    1280                                                       13089   -2.03   -0.01  1.0000
 -12   7   0   12402    1360                                                       13469    2.03   -0.01  1.0000
 -13   7   0    6719    1030                                                        7129    0.00   -1.07  1.0000
 -13  -7   0    7706    1010                                                        8159    0.00   -1.10  1.0000
 -14   7   0    5509     980                                                        5869   -1.04    0.01  1.0000
 -15  -7   0    1054     920                                                        1250    0.01   -1.26  1.0000
   0  -8   0   89423    5349                                                       81742   -5.65   -0.08  1.0000
   0   8   0   92708    5679                                                       84892   -5.65    0.08  1.0000
  -1   8   0    2993     700                                                        6349   -0.03   10.99  1.0000
   1   8   0    3243     760                                                        6899   -0.03   11.59  1.0000
   1  -8   0    3256     580                                                        6689   -0.03  -10.99  1.0000
  -1  -8   0    2553     570                                                        5909   -0.03  -11.59  1.0000
   1  -8   0    3186     490                                                        6589   -0.03  -10.99  1.0000
  -2  -8   0  158608    6949                                                      110689  -28.22   -0.01  1.0000
   2   8   0  155851    7369                                                      108389  -28.22    0.01  1.0000
   2   8   0  154964    6889                                                      107649  -28.22    0.01  1.0000
   2  -8   0  156223    6959                                                      108529  -28.33    0.00  1.0000
  -2   8   0  155647    7299                                                      108049  -28.33    0.00  1.0000
  -3  -8   0  176094   11679                                                      183662    0.02   -3.86  1.0000
  -3   8   0  172470   12239                                                      180422    0.00    4.09  1.0000
   3  -8   0  171306   11689                                                      179232    0.00   -4.09  1.0000
   3   8   0  182164   11609                                                      189861    0.02    3.86  1.0000
   3   8   0  177708   12319                                                      185311    0.02    3.86  1.0000
  -4   8   0    2469     660                                                        6379  -13.28    0.01  1.0000
   4  -8   0    2967     680                                                        7169  -13.28   -0.01  1.0000
   4   8   0    2285     760                                                        6089  -13.31    0.00  1.0000
  -4  -8   0    2706     640                                                        6769  -13.31    0.00  1.0000
  -5  -8   0   26027    1500                                                       21608   -0.04   -6.19  1.0000
   5   8   0   25490    1680                                                       21118   -0.04    6.19  1.0000
  -5   8   0   23782    1550                                                       19608   -0.04    6.12  1.0000
   5  -8   0   25706    1530                                                       21358   -0.04   -6.12  1.0000
   6   8   0   27629    2460                                                       32607    6.18   -0.10  1.0000
  -6   8   0   26293    2340                                                       31207    6.25   -0.13  1.0000
   6  -8   0   28707    2300                                                       33837    6.25    0.13  1.0000
  -6  -8   0   28629    2250                                                       33697    6.18    0.10  1.0000
  -7   8   0   38663    2870                                                       39796   -0.03   -1.24  1.0000
  -7  -8   0   39935    2760                                                       41056   -0.03    1.20  1.0000
   7   8   0   39678    3010                                                       40796   -0.03   -1.20  1.0000
  -8   8   0     125     360                                                         370    3.54   -0.14  1.0000
  -8  -8   0      67     360                                                        -200    3.53    0.05  1.0000
  -9  -8   0   35778    2490                                                       34827    0.02    1.10  1.0000
  -9   8   0   36925    2600                                                       36046    0.03   -1.00  1.0000
 -10   8   0     531     440                                                         340   -1.98   -0.02  1.0000
 -10  -8   0      21     390                                                        -230   -1.97    0.01  1.0000
 -11   8   0   18190    1710                                                       19538    0.01   -2.12  1.0000
 -11  -8   0   19410    1600                                                       20808    0.01    2.13  1.0000
 -12  -8   0    1643     600                                                        1520    0.67    0.00  1.0000
 -12   8   0    1821     640                                                        1690    0.67    0.01  1.0000
 -13  -8   0   25015    2050                                                       25167   -0.01    0.21  1.0000
 -13   8   0   26898    2170                                                       27087   -0.01   -0.25  1.0000
 -14  -8   0     310     840                                                         190    1.67   -0.01  1.0000
 -14   8   0      15     660                                                         -30    1.66    0.02  1.0000
   1  -9   0   11435     910                                                       13639   -0.05    4.29  1.0000
   1   9   0   12738    1220                                                       14949    0.04    4.09  1.0000
  -1   9   0   11522    1160                                                       13729   -0.05   -4.29  1.0000
   1  -9   0    8949     960                                                       10909   -0.05    4.29  1.0000
  -1  -9   0   10094     980                                                       12069    0.04   -4.09  1.0000
  -2  -9   0  118420    5649                                                       87221  -21.07    0.00  1.0000
  -2   9   0  118047    5949                                                       86911   21.07    0.00  1.0000
   2   9   0  119772    6039                                                       88381  -21.07    0.00  1.0000
   2  -9   0  118255    5659                                                       87091   21.07    0.00  1.0000
   2   9   0  120307    5589                                                       88841  -21.07    0.00  1.0000
   3   9   0   15053    1040                                                       15298    0.01    0.43  1.0000
   3  -9   0   14424    1160                                                       14809   -0.03    0.68  1.0000
  -3   9   0   14729    1220                                                       15118   -0.03   -0.68  1.0000
   3   9   0   13180    1360                                                       13409    0.01    0.43  1.0000
  -3  -9   0   15331    1130                                                       15578    0.01   -0.43  1.0000
  -4   9   0  152344   11889                                                      178812   14.04    0.01  1.0000
   4  -9   0  152920   11379                                                      179432   14.04   -0.01  1.0000
   4   9   0  152718   11989                                                      178942  -13.90   -0.01  1.0000
  -4  -9   0  149451   11339                                                      175402  -13.90    0.01  1.0000
  -5  -9   0  158186   10849                                                      172463    0.01   -7.57  1.0000
   5   9   0  155448   11469                                                      169603    0.01    7.57  1.0000
  -5   9   0  155941   11359                                                      170133    0.01   -7.58  1.0000
   5  -9   0  153500   10879                                                      167583    0.01    7.58  1.0000
   6   9   0   14983    1640                                                       18798   -6.33    0.00  1.0000
  -6  -9   0   15528    1410                                                       19408   -6.33    0.00  1.0000
  -6   9   0   13944    1460                                                       17638    6.34   -0.01  1.0000
   6  -9   0   14131    1420                                                       17848    6.34    0.01  1.0000
   7   9   0    1319     630                                                        2080    0.00    4.04  1.0000
  -7   9   0    1469     490                                                        2250    0.02   -4.00  1.0000
  -7  -9   0    1754     480                                                        2610    0.00   -4.04  1.0000
  -8  -9   0    4501     460                                                        1560  -13.27   -0.01  1.0000
  -8   9   0    3416     450                                                         930   13.28   -0.01  1.0000
   8   9   0    5089     640                                                        1930  -13.27    0.01  1.0000
  -9  -9   0    5492     760                                                        5669   -0.02   -0.51  1.0000
  -9   9   0    6858     820                                                        7049    0.02   -0.49  1.0000
 -10  -9   0   55657    3950                                                       56954   -1.18   -0.02  1.0000
 -10   9   0   58503    4140                                                       59884    1.23   -0.02  1.0000
 -11  -9   0   34717    2410                                                       33097   -0.01    1.90  1.0000
 -11   9   0   34466    2490                                                       32877    0.00    1.87  1.0000
 -12  -9   0    2718     650                                                        2470    1.06   -0.02  1.0000
 -12   9   0    1747     660                                                        1550   -1.05   -0.02  1.0000
 -13  -9   0      11     580                                                        -490    0.01    1.40  1.0000
 -13   9   0      10     610                                                        -350   -0.02    1.35  1.0000
 -14  -9   0    6193    1240                                                        6339    0.40    0.00  1.0000
 -14   9   0    5545    1000                                                        5699   -0.45    0.01  1.0000
   0 -10   0    7163    1490                                                       19918   25.05    0.06  1.0000
   0  10   0    8808    1730                                                       22638   25.05   -0.06  1.0000
  -1 -10   0    3348     290                                                         800    0.03   12.95  1.0000
   1 -10   0    3254     310                                                         830    0.01   12.42  1.0000
   1 -10   0    3580     180                                                        1000    0.01   12.42  1.0000
  -1  10   0    3655     490                                                        1030    0.01  -12.42  1.0000
   1  10   0    4019     500                                                        1160    0.03  -12.95  1.0000
   2 -10   0   78545    8569                                                      134907   37.56    0.00  1.0000
   2  10   0   78954    9079                                                      135306   37.48   -0.01  1.0000
  -2 -10   0   80405    8569                                                      137206   37.48    0.01  1.0000
   2 -10   0   79353    8749                                                      135966   37.56    0.00  1.0000
  -2  10   0   73756    9009                                                      128607   37.56    0.00  1.0000
   2  10   0   75511    8499                                                      130787   37.48   -0.01  1.0000
  -3 -10   0   22694    1490                                                       19458    0.03    4.83  1.0000
   3  10   0   23817    1410                                                       20498    0.03   -4.83  1.0000
   3  10   0   24991    1770                                                       21588    0.03   -4.83  1.0000
   3 -10   0   22393    1510                                                       19038    0.03    5.04  1.0000
  -3  10   0   27940    1670                                                       24178    0.03   -5.04  1.0000
   4  10   0   85609    7529                                                      112349   18.38    0.05  1.0000
  -4 -10   0   83490    7059                                                      109909   18.38   -0.05  1.0000
  -4  10   0   83223    7409                                                      109709   18.44    0.07  1.0000
   4 -10   0   81009    7089                                                      107149   18.44   -0.07  1.0000
  -5 -10   0       5     310                                                         110    0.03    3.75  1.0000
   5  10   0      24     470                                                         180    0.03   -3.75  1.0000
  -5  10   0      76     340                                                         -40    0.05   -3.74  1.0000
   5 -10   0     177     390                                                         480    0.05    3.74  1.0000
   6  10   0   37641    3410                                                       43876   -6.74    0.36  1.0000
   6 -10   0   37742    3150                                                       44066   -6.73   -0.44  1.0000
  -6 -10   0   39782    3120                                                       46265   -6.74   -0.36  1.0000
  -6  10   0   42573    3280                                                       49175   -6.73    0.44  1.0000
   7  10   0   21093    1740                                                       19518    0.04    2.38  1.0000
  -7  10   0   22410    1580                                                       20748    0.04    2.44  1.0000
  -7 -10   0   20625    1530                                                       19068    0.04   -2.38  1.0000
  -8 -10   0   26391    1730                                                       22868   -4.84   -0.06  1.0000
   8  10   0   25083    1930                                                       21658   -4.84    0.06  1.0000
  -8  10   0   26134    1770                                                       22678   -4.78    0.09  1.0000
  -9  10   0   14041    1340                                                       14889    0.01    1.53  1.0000
  -9 -10   0   14246    1300                                                       15108    0.01   -1.54  1.0000
 -10 -10   0   11080    1070                                                       11129    0.10    0.02  1.0000
 -10  10   0   11548    1170                                                       11609    0.13   -0.03  1.0000
 -11  10   0      14     500                                                         -30   -0.01    1.60  1.0000
 -11 -10   0     768     540                                                         620   -0.01   -1.60  1.0000
 -12 -10   0   27516    2250                                                       29447   -2.48    0.00  1.0000
 -12  10   0   27713    2370                                                       29627   -2.46    0.00  1.0000
 -13  10   0      58     630                                                          60    0.00    0.06  1.0000
 -13 -10   0       0     600                                                        -360    0.01    0.00  1.0000
 -14 -10   0      13     880                                                        -200   -1.55   -0.01  1.0000
 -14  10   0      12     670                                                        -300   -1.52    0.02  1.0000
  -1 -11   0  104325    7449                                                      112539   -0.02    5.38  1.0000
  -1  11   0  109009    7919                                                      117328    0.01    5.34  1.0000
   1 -11   0  104770    7459                                                      112929    0.01   -5.34  1.0000
   1 -11   0  111486    7629                                                      119898    0.01   -5.34  1.0000
   1  11   0  108465    7919                                                      116838   -0.02   -5.38  1.0000
  -2  11   0      47     650                                                        3420  -22.69   -0.01  1.0000
  -2 -11   0     123     520                                                        4000   22.75   -0.03  1.0000
   2 -11   0      47     300                                                        3420  -22.69    0.01  1.0000
   2  11   0     143     770                                                        4120   22.75    0.03  1.0000
   2  11   0      38     400                                                        3340   22.75    0.03  1.0000
   2 -11   0     171     520                                                        4250  -22.69    0.01  1.0000
   3  11   0   20854    1270                                                       18308    0.02   -3.92  1.0000
   3 -11   0   20656    1370                                                       18078    0.01   -3.99  1.0000
  -3  11   0   20239    1500                                                       17688    0.01    3.99  1.0000
   3  11   0   19358    1590                                                       16908    0.02   -3.92  1.0000
  -3 -11   0   21600    1370                                                       19008    0.02    3.92  1.0000
  -4 -11   0    8490    1420                                                       18778   19.34    0.00  1.0000
   4  11   0    8632    1640                                                       18988   19.34    0.00  1.0000
   4 -11   0    7301    1430                                                       17078  -19.49   -0.04  1.0000
  -4  11   0    8208    1500                                                       18448  -19.49    0.04  1.0000
  -5 -11   0   27085    1600                                                       20088    0.00    9.95  1.0000
  -5  11   0   31637    1740                                                       24028   -0.01    9.96  1.0000
   5  11   0   27449    1820                                                       20398    0.00   -9.95  1.0000
   5 -11   0   28046    1660                                                       20908   -0.01   -9.96  1.0000
   6 -11   0     335     520                                                        1720  -10.01    0.01  1.0000
  -6 -11   0     131     420                                                        1190    9.96    0.00  1.0000
  -6  11   0     110     500                                                        1130  -10.01   -0.01  1.0000
   6  11   0      64     610                                                         960    9.96    0.00  1.0000
  -7  11   0    5151     870                                                        6759    0.01    4.58  1.0000
   7 -11   0    6226     940                                                        7989    0.01   -4.58  1.0000
   7  11   0    7453    1150                                                        9359   -0.01   -4.55  1.0000
  -7 -11   0    6366     840                                                        8129   -0.01    4.55  1.0000
  -8 -11   0     204     490                                                        1810   12.20   -0.03  1.0000
  -8  11   0      27     530                                                        1110  -12.18   -0.03  1.0000
   8  11   0     100     710                                                        1460   12.20    0.03  1.0000
   9  11   0    2008     810                                                        2440    0.02    1.97  1.0000
  -9 -11   0    2117     590                                                        2560    0.02   -1.97  1.0000
  -9  11   0    2012     630                                                        2450   -0.01   -2.00  1.0000
 -10 -11   0     629     520                                                         410    2.08    0.04  1.0000
 -10  11   0      24     490                                                        -120   -2.09    0.06  1.0000
 -11  11   0   23834    2130                                                       25497   -0.01   -2.30  1.0000
 -11 -11   0   24273    2050                                                       25937    0.01   -2.28  1.0000
 -12 -11   0     818     610                                                         760   -0.47    0.08  1.0000
 -12  11   0     101     650                                                          80    0.47    0.08  1.0000
 -13 -11   0     353     630                                                         300   -0.01   -0.84  1.0000
 -13  11   0     503     700                                                         440    0.01   -0.82  1.0000
   0  12   0   19646    2980                                                       40386  -26.24    0.04  1.0000
   0 -12   0   18760    2690                                                       39116  -26.24   -0.04  1.0000
   0 -12   0   19260    2690                                                       39836  -26.24   -0.04  1.0000
   1 -12   0    1075     520                                                        3740   -0.01  -12.27  1.0000
   1 -12   0    1140     370                                                        3860   -0.01  -12.27  1.0000
  -1  12   0     183     670                                                        1750   -0.01   12.27  1.0000
   1  12   0    1178     780                                                        3980   -0.02   12.44  1.0000
  -1 -12   0    1048     510                                                        3740   -0.02  -12.44  1.0000
   2  12   0   29225    1030                                                        8249  -34.57    0.00  1.0000
  -2  12   0   25129     890                                                        6149  -34.56    0.03  1.0000
  -2 -12   0   26594     730                                                        6879  -34.57    0.00  1.0000
   2  12   0   24633     600                                                        5899  -34.57    0.00  1.0000
   2 -12   0   26585     720                                                        6879  -34.56   -0.03  1.0000
   3 -12   0    8661     760                                                        6799   -0.02   -4.60  1.0000
  -3 -12   0    7515     690                                                        5849   -0.03   -4.42  1.0000
   3  12   0    9505     980                                                        7619   -0.03    4.42  1.0000
  -3  12   0    7619     840                                                        5879   -0.02    4.60  1.0000
   4  12   0     213     610                                                         810  -16.95   -0.09  1.0000
  -4 -12   0     168     410                                                        1020  -16.95    0.09  1.0000
   4 -12   0     815     390                                                         140  -17.06    0.14  1.0000
  -4  12   0     124     540                                                        1380  -17.06   -0.14  1.0000
   5  12   0    3818     830                                                        4230    0.00    1.41  1.0000
   5 -12   0    3297     660                                                        3670    0.00   -1.37  1.0000
  -5 -12   0    3429     580                                                        3820    0.00   -1.41  1.0000
  -5  12   0    3610     660                                                        4000    0.00    1.37  1.0000
   6 -12   0     380     490                                                         160    5.76    0.62  1.0000
   6  12   0     188     620                                                         -60    5.87   -0.50  1.0000
  -6  12   0     817     460                                                         710    5.76   -0.62  1.0000
  -6 -12   0     188     370                                                        -150    5.87    0.50  1.0000
  -7 -12   0    1900     470                                                        1510    0.00    2.09  1.0000
   7 -12   0     731     540                                                         490    0.01    2.16  1.0000
  -7  12   0     960     500                                                         680    0.01   -2.16  1.0000
   7  12   0    1900     750                                                        1510    0.00   -2.09  1.0000
  -8 -12   0    2422     620                                                        3370    3.82    0.10  1.0000
  -8  12   0    3085     700                                                        4120    3.75   -0.09  1.0000
   8  12   0    2223     840                                                        3130    3.82   -0.10  1.0000
   9  12   0    1769     800                                                        1890   -0.01   -0.62  1.0000
  -9  12   0     404     520                                                         470   -0.02   -0.68  1.0000
  -9 -12   0       2     490                                                           0   -0.01    0.62  1.0000
 -10  12   0    8549    1050                                                        8489   -0.14    0.04  1.0000
 -10 -12   0    7937     960                                                        7879   -0.14   -0.04  1.0000
 -11  12   0    4379     820                                                        4050    0.00   -1.10  1.0000
 -11 -12   0    2477     700                                                        2240    0.00    1.05  1.0000
 -12  12   0    2746     760                                                        2120    2.77    0.01  1.0000
 -12 -12   0    1875     680                                                        1360    2.79    0.00  1.0000
 -13  12   0    2404     830                                                        2330    0.01   -0.33  1.0000
 -13 -12   0    4157    1050                                                        4080    0.01    0.26  1.0000
  -1 -13   0    6239     510                                                        4390   -0.03   -5.48  1.0000
   1 -13   0    5858     590                                                        4120    0.04    5.32  1.0000
   1  13   0    6465     870                                                        4580   -0.03    5.48  1.0000
  -1  13   0    6980     880                                                        5069    0.04   -5.32  1.0000
   1  13   0    6358     520                                                        4490   -0.03    5.48  1.0000
  -1 -13   0    6322     600                                                        4460   -0.03   -5.48  1.0000
  -2 -13   0    1518     720                                                        6339  -17.52    0.04  1.0000
   2  13   0     660     930                                                        4400  -17.52   -0.04  1.0000
   2 -13   0    2186     790                                                        7619   17.47   -0.02  1.0000
  -2  13   0    1747     970                                                        6779   17.47    0.02  1.0000
  -3  13   0     193     660                                                         760    0.04   -5.90  1.0000
   3 -13   0       6     380                                                         130    0.04    5.90  1.0000
  -3 -13   0     128     400                                                         630   -0.03   -5.95  1.0000
   3  13   0     170     650                                                         720   -0.03    5.95  1.0000
   4 -13   0     340     440                                                         540   16.41    0.04  1.0000
  -4 -13   0     223     420                                                         960  -16.37    0.03  1.0000
  -4  13   0     472     560                                                         360   16.41   -0.04  1.0000
   4  13   0     217     660                                                         930  -16.37   -0.03  1.0000
  -5  13   0    7471     780                                                        4190    0.01   -9.35  1.0000
  -5 -13   0    7519     620                                                        4210   -0.01   -9.40  1.0000
   5  13   0    6435     840                                                        3410   -0.01    9.40  1.0000
   5 -13   0    7816     710                                                        4450    0.01    9.35  1.0000
  -6  13   0      67     560                                                         820    8.81    0.01  1.0000
   6 -13   0     509     620                                                        1850    8.81   -0.01  1.0000
   6  13   0     929     830                                                        2600   -8.84    0.00  1.0000
  -6 -13   0     869     560                                                        2500   -8.84    0.00  1.0000
   7 -13   0    1964     630                                                        1370   -0.02    3.16  1.0000
   7  13   0    2461     750                                                        1800    0.01    3.11  1.0000
  -7  13   0    2589     600                                                        1900   -0.02   -3.16  1.0000
  -7 -13   0    1144     500                                                         710    0.01   -3.11  1.0000
  -8  13   0     991     710                                                        2820    9.33    0.03  1.0000
   8  13   0     847     890                                                        2580   -9.36   -0.03  1.0000
  -8 -13   0    1229     640                                                        3220   -9.36    0.03  1.0000
  -9  13   0    1708     710                                                        2230    0.00    2.54  1.0000
  -9 -13   0    1723     640                                                        2250    0.01    2.55  1.0000
   9  13   0    1960     900                                                        2520    0.01   -2.55  1.0000
  10  13   0     424     790                                                         510   -0.86    0.02  1.0000
 -10  13   0     342     590                                                         420    0.86   -0.03  1.0000
 -10 -13   0     451     530                                                         540   -0.86   -0.02  1.0000
 -11 -13   0      10     590                                                         -90    0.00    1.37  1.0000
 -11  13   0     611     710                                                         780    0.00    1.38  1.0000
 -12 -13   0       3     620                                                        -290    0.70   -0.07  1.0000
 -12 -13   0       3     780                                                        -440    0.70   -0.07  1.0000
 -12  13   0       3     730                                                        -140   -0.69   -0.06  1.0000
 -13 -13   0       1     930                                                        -170   -0.01    0.42  1.0000
 -13  13   0     261     780                                                         230    0.01    0.43  1.0000
   0  14   0    8814     890                                                        2760   17.88   -0.02  1.0000
   0 -14   0    9187     540                                                        2970   17.88    0.02  1.0000
  -1 -14   0    7930     540                                                        4770   -0.01    8.60  1.0000
  -1 -14   0    8263     640                                                        5029   -0.01    8.60  1.0000
   1  14   0    6862     940                                                        3950   -0.01   -8.60  1.0000
   1 -14   0    7005     640                                                        4040    0.01    8.67  1.0000
   1  14   0    7516     570                                                        4450   -0.01   -8.60  1.0000
  -1  14   0    8431     930                                                        5139    0.01   -8.67  1.0000
   2 -14   0       2     560                                                        3200   24.56    0.03  1.0000
  -2  14   0      17     870                                                        2820   24.56   -0.03  1.0000
  -2 -14   0      18     470                                                        2800   24.53    0.00  1.0000
   2  14   0      13     820                                                        2870   24.53    0.00  1.0000
  -2 -14   0       3     560                                                        3110   24.53    0.00  1.0000
  -3  14   0   21416    1820                                                       18718   -0.01   -4.11  1.0000
   3 -14   0   21950    1590                                                       19218   -0.01    4.11  1.0000
   3  14   0   22041    1850                                                       19328    0.00   -4.07  1.0000
  -3 -14   0   24525    1560                                                       21658    0.00    4.07  1.0000
  -4 -14   0     803     400                                                        -100   12.20   -0.04  1.0000
  -4  14   0    1397     610                                                          80   12.24    0.08  1.0000
   4  14   0     803     660                                                        -100   12.20    0.04  1.0000
   4 -14   0    1339     480                                                          70   12.24   -0.08  1.0000
   5  14   0   11086    1370                                                       10939   -0.03   -0.30  1.0000
  -5 -14   0   11398    1080                                                       11249   -0.03    0.30  1.0000
  -5  14   0   11765    1240                                                       11639   -0.06   -0.25  1.0000
   5 -14   0   11776    1210                                                       11649   -0.06    0.25  1.0000
  -6  14   0    1866     670                                                        1210   -3.60    0.43  1.0000
   6  14   0     713     680                                                         330   -3.66    0.32  1.0000
  -6 -14   0    1847     520                                                        1200   -3.66   -0.32  1.0000
   6 -14   0     822     560                                                         420   -3.60   -0.43  1.0000
   7 -14   0    8148    1180                                                        9249   -0.06   -2.54  1.0000
  -7  14   0    8505    1120                                                        9629   -0.06    2.54  1.0000
   7  14   0   10267    1380                                                       11479   -0.06    2.50  1.0000
  -7 -14   0    8390    1020                                                        9489   -0.06   -2.50  1.0000
   8 -14   0    4829     900                                                        4270   -1.78   -0.06  1.0000
  -8  14   0    5633     840                                                        5029   -1.78    0.06  1.0000
   8  14   0    5242    1020                                                        4650   -1.82    0.07  1.0000
  -8 -14   0    6059     770                                                        5419   -1.82   -0.07  1.0000
  -9  14   0    2339     780                                                        2410    0.00    0.31  1.0000
   9  14   0    2503     930                                                        2560   -0.01    0.25  1.0000
  -9 -14   0    2918     690                                                        2980   -0.01   -0.25  1.0000
 -10  14   0    6137    1030                                                        6419    0.77    0.00  1.0000
 -10 -14   0    9441    1080                                                        9799    0.79    0.00  1.0000
  10  14   0    8892    1430                                                        9239    0.79    0.00  1.0000
 -11  14   0     239     740                                                         300    0.00    0.80  1.0000
 -11 -14   0     543     670                                                         630    0.01   -0.77  1.0000
 -12 -14   0    1340     930                                                        1060   -1.74    0.01  1.0000
 -12 -14   0    2017     750                                                        1670   -1.74    0.01  1.0000
 -12  14   0     805     790                                                         590   -1.76   -0.02  1.0000
  -1 -15   0    7230     860                                                        8619    0.04    3.40  1.0000
   1  15   0    4922    1090                                                        6079    0.04   -3.40  1.0000
  -1  15   0    5913    1110                                                        7169   -0.04    3.37  1.0000
   1 -15   0    5342     810                                                        6539   -0.04   -3.37  1.0000
  -2 -15   0    1801     650                                                        4510   10.73   -0.03  1.0000
  -2  15   0     717     870                                                        2660  -10.78   -0.02  1.0000
   2  15   0     581     830                                                        2380   10.73    0.03  1.0000
  -2 -15   0    1663     560                                                        4290   10.73   -0.03  1.0000
   2 -15   0    1256     630                                                        3630  -10.78    0.02  1.0000
   3  15   0     132     660                                                        -190    0.01   -4.94  1.0000
   3 -15   0     125     390                                                        -640   -0.04   -4.81  1.0000
  -3 -15   0     132     380                                                         -40    0.01    4.94  1.0000
  -3 -15   0     159     460                                                         520    0.01    4.94  1.0000
  -3  15   0      24     740                                                         180   -0.04    4.81  1.0000
   4 -15   0   17888    1180                                                       13069   -8.40    0.03  1.0000
   4  15   0   13726    1360                                                        9549    8.39    0.06  1.0000
  -4 -15   0   16452    1140                                                       11849    8.39   -0.06  1.0000
  -4  15   0   16412    1400                                                       11809   -8.40   -0.03  1.0000
   5 -15   0    4059     630                                                        2100    0.00   -7.77  1.0000
   5  15   0    5199     900                                                        2910    0.01   -7.89  1.0000
  -5 -15   0    4472     600                                                        2370    0.01    7.89  1.0000
  -5  15   0    4475     770                                                        2400    0.00    7.77  1.0000
  -6 -15   0    6899     780                                                        5379    4.20    0.00  1.0000
   6  15   0    5382    1030                                                        4050    4.20    0.00  1.0000
   6 -15   0    6393     890                                                        4950   -4.15    0.00  1.0000
  -6  15   0    6733     950                                                        5249   -4.15    0.00  1.0000
   7  15   0    4051    1100                                                        4530   -0.01   -1.59  1.0000
  -7  15   0    4612     960                                                        5139    0.01    1.64  1.0000
  -7 -15   0    4514     770                                                        5019   -0.01    1.59  1.0000
   7 -15   0    5810     970                                                        6399    0.01   -1.64  1.0000
   8  15   0    3576     950                                                        1920    6.88   -0.01  1.0000
  -8 -15   0    4406     670                                                        2540    6.88    0.01  1.0000
   8 -15   0    1238     720                                                         370   -6.87    0.00  1.0000
  -8  15   0    2442     750                                                        1120   -6.87    0.00  1.0000
  -9 -15   0    5138     790                                                        4670   -0.02   -1.44  1.0000
  -9  15   0    5038     900                                                        4580    0.00   -1.42  1.0000
   9  15   0    4581    1090                                                        4140   -0.02    1.44  1.0000
 -10  15   0   15034    1600                                                       14899   -0.24   -0.04  1.0000
 -10 -15   0   16328    1530                                                       16228    0.17   -0.04  1.0000
 -10 -15   0   14132    1640                                                       14039    0.17   -0.04  1.0000
  10  15   0   18117    1940                                                       18008    0.17    0.04  1.0000
 -11 -15   0    3477    1060                                                        3520   -0.01   -0.16  1.0000
 -11  15   0    4864    1010                                                        4910    0.00   -0.14  1.0000
 -11 -15   0    4372     840                                                        4420   -0.01   -0.16  1.0000
 -12  15   0    2819     950                                                        3050    0.92    0.00  1.0000
 -12 -15   0    1843    1060                                                        2040   -0.97    0.00  1.0000
 -12 -15   0    2405     830                                                        2630   -0.97    0.00  1.0000
   0 -16   0   17490    1730                                                       22188   -7.25   -0.01  1.0000
   0  16   0   16985    2060                                                       21618   -7.25    0.01  1.0000
   1  16   0    7425    1320                                                        8979    0.01    3.71  1.0000
  -1 -16   0    7426    1000                                                        8979    0.01   -3.71  1.0000
   1 -16   0    9268    1040                                                       11029   -0.01   -3.78  1.0000
  -1  16   0   10556    1430                                                       12429   -0.01    3.78  1.0000
   2 -16   0    1735     500                                                         150  -12.87    0.00  1.0000
  -2 -16   0    2292     500                                                         350  -12.83   -0.01  1.0000
  -2  16   0    1735     820                                                         150  -12.87    0.00  1.0000
   2  16   0     889     680                                                        -290  -12.83    0.01  1.0000
  -3  16   0    4657    1120                                                        5819    0.00    3.47  1.0000
   3  16   0    6617    1180                                                        8009    0.00    3.52  1.0000
  -3 -16   0    6198     840                                                        7549    0.00   -3.52  1.0000
   3 -16   0    6126     910                                                        7449    0.00   -3.47  1.0000
  -3 -16   0    6807     930                                                        8219    0.00   -3.52  1.0000
   4 -16   0     387     530                                                         160   -5.62   -0.01  1.0000
  -4 -16   0     514     510                                                         270   -5.63   -0.01  1.0000
  -4  16   0     421     740                                                         190   -5.62    0.01  1.0000
   4  16   0     657     750                                                         400   -5.63    0.01  1.0000
  -4 -16   0     291     440                                                          80   -5.63   -0.01  1.0000
  -5 -16   0   12159    1170                                                       12319    0.02   -0.31  1.0000
   5 -16   0   13797    1380                                                       13969    0.04   -0.32  1.0000
   5  16   0   11781    1490                                                       11939    0.02    0.31  1.0000
  -5  16   0   11283    1440                                                       11439    0.04    0.32  1.0000
  -5 -16   0   11781    1230                                                       11939    0.02   -0.31  1.0000
   6 -16   0   12463    1260                                                       11209    2.50    0.10  1.0000
  -6 -16   0    9958    1030                                                        8859    2.47    0.05  1.0000
  -6  16   0   10956    1280                                                        9799    2.50   -0.10  1.0000
   6  16   0    9483    1320                                                        8419    2.47   -0.05  1.0000
   7 -16   0     647     720                                                         320    0.04    3.26  1.0000
  -7  16   0    1397     800                                                         890    0.04   -3.26  1.0000
  -7 -16   0    1710     600                                                        1140    0.04    3.28  1.0000
   7  16   0     871     890                                                         480    0.04   -3.28  1.0000
   8  16   0    4137    1120                                                        4480    1.14   -0.02  1.0000
  -8 -16   0    3320     740                                                        3630    1.14    0.02  1.0000
  -8 -16   0    3454     840                                                        3770    1.14    0.02  1.0000
   8 -16   0    3521     980                                                        3850    1.17    0.03  1.0000
  -8  16   0    2437     870                                                        2710    1.17   -0.03  1.0000
   9  16   0       5     950                                                         -20    0.01   -0.94  1.0000
  -9  16   0       5     790                                                        -110    0.01   -0.99  1.0000
  -9 -16   0     646     600                                                         540    0.01    0.94  1.0000
  -9 -16   0       5     670                                                        -530    0.01    0.94  1.0000
 -10  16   0    8539    1260                                                        8369   -0.40   -0.02  1.0000
 -10 -16   0    9619    1310                                                        9429   -0.42    0.03  1.0000
 -10 -16   0   10103    1170                                                        9909   -0.42    0.03  1.0000
  10  16   0    8662    1530                                                        8479   -0.42   -0.03  1.0000
 -11 -16   0    2598     990                                                        2640    0.00    0.18  1.0000
 -11  16   0    2588     970                                                        2630    0.00   -0.18  1.0000
 -11 -16   0    3531     860                                                        3580    0.00    0.18  1.0000
  -1  17   0    5361    1100                                                        4860    0.01   -1.54  1.0000
  -1 -17   0    5022     760                                                        4550   -0.01   -1.50  1.0000
   1 -17   0    6137     790                                                        5599    0.01    1.54  1.0000
   1  17   0    7688    1170                                                        7099   -0.01    1.50  1.0000
  -2  17   0   17851    2180                                                       21878    6.18    0.00  1.0000
   2  17   0   22749    2220                                                       27227   -6.13    0.00  1.0000
  -2 -17   0   21170    1910                                                       25497   -6.13    0.00  1.0000
   2 -17   0   18691    1880                                                       22808    6.18    0.00  1.0000
  -3  17   0   10690    1530                                                       11559    0.01   -1.77  1.0000
   3  17   0   11442    1550                                                       12399    0.01    1.89  1.0000
  -3 -17   0   11721    1190                                                       12689    0.01   -1.89  1.0000
   3 -17   0   10873    1220                                                       11749    0.01    1.77  1.0000
   4 -17   0      10     540                                                          50    1.74   -0.05  1.0000
  -4 -17   0     126     520                                                         230   -1.75    0.04  1.0000
   4  17   0     758     790                                                         990   -1.75   -0.04  1.0000
  -4  17   0      16     820                                                        -200    1.74    0.05  1.0000
   5 -17   0   62521    4560                                                       68393    0.00    4.95  1.0000
  -5 -17   0   62174    4430                                                       68123    0.02   -5.03  1.0000
  -5  17   0   53664    4750                                                       59114    0.00   -4.95  1.0000
   5  17   0   58767    4850                                                       64554    0.02    5.03  1.0000
  -6 -17   0    3885     760                                                        3960   -0.26    0.01  1.0000
   6  17   0    4727    1120                                                        4810   -0.26   -0.01  1.0000
  -6  17   0    2878    1000                                                        2950    0.29    0.00  1.0000
  -6 -17   0    2500     750                                                        2560   -0.26    0.01  1.0000
   6 -17   0    3036     820                                                        3110    0.29    0.00  1.0000
   7 -17   0    1795     780                                                        1680   -0.01    0.61  1.0000
   7  17   0    2538    1050                                                        2410    0.00    0.58  1.0000
  -7  17   0    1744     910                                                        1630   -0.01   -0.61  1.0000
  -7 -17   0    2683     670                                                        2550    0.00   -0.58  1.0000
  -7 -17   0    1541     720                                                        1440    0.00   -0.58  1.0000
   8  17   0   28282    2770                                                       31777   -4.36    0.01  1.0000
   8 -17   0   30072    2640                                                       33667    4.35    0.02  1.0000
  -8 -17   0   25896    2470                                                       29247   -4.36   -0.01  1.0000
  -8 -17   0   29016    2390                                                       32557   -4.36   -0.01  1.0000
  -8  17   0   23979    2530                                                       27197    4.35   -0.02  1.0000
   9  17   0     675     960                                                         680    0.01    0.04  1.0000
  -9 -17   0       0     750                                                       -1000    0.01   -0.04  1.0000
  -9  17   0       0     840                                                        -690   -0.01   -0.05  1.0000
  -9 -17   0       0     580                                                        -200    0.01   -0.04  1.0000
 -10 -17   0       8     850                                                          10   -0.11    0.06  1.0000
 -10  17   0       0     820                                                       -1360    0.15    0.07  1.0000
  10  17   0       0     900                                                        -950   -0.11   -0.06  1.0000
 -10 -17   0      75     690                                                          80   -0.11    0.06  1.0000
   0 -18   0     403     520                                                         520   -1.22    0.01  1.0000
   0  18   0      60     880                                                         110   -1.22   -0.01  1.0000
   1  18   0   24758    2230                                                       23778    0.00   -1.36  1.0000
  -1 -18   0   23084    1770                                                       22138    0.00    1.36  1.0000
  -1  18   0   25150    2160                                                       24138    0.00   -1.40  1.0000
   1 -18   0   22066    1820                                                       21118    0.00    1.40  1.0000
  -2 -18   0    1487     570                                                        1060    4.46    0.02  1.0000
  -2  18   0     105     820                                                        -490    4.42    0.01  1.0000
   2  18   0     745     850                                                         430    4.46   -0.02  1.0000
  -2  18   0    1501     590                                                        1070    4.42    0.01  1.0000
   2 -18   0     474     530                                                         220    4.42   -0.01  1.0000
  -3 -18   0    1304     640                                                        1530    0.00    1.36  1.0000
   3  18   0    2450    1010                                                        2760    0.00   -1.36  1.0000
   3 -18   0    1385     630                                                        1620    0.00    1.36  1.0000
  -3  18   0    2463     970                                                        2770    0.00   -1.36  1.0000
   4  18   0     816     830                                                         990    1.37   -0.01  1.0000
  -4 -18   0     842     590                                                        1020    1.37    0.01  1.0000
   4 -18   0    1010     640                                                        1210    1.40    0.02  1.0000
  -4  18   0      11     880                                                         -10    1.40   -0.02  1.0000
  -5  18   0    9864    1490                                                        9549    0.00   -0.69  1.0000
  -5 -18   0   14520    1260                                                       14139    0.01    0.69  1.0000
   5 -18   0   12646    1420                                                       12289    0.00    0.69  1.0000
   5  18   0   11924    1570                                                       11579    0.01   -0.69  1.0000
  -6  18   0    2944    1070                                                        3510   -2.16   -0.03  1.0000
   6  18   0    3923    1110                                                        4570   -2.15   -0.02  1.0000
   6 -18   0    4683     980                                                        5389   -2.16    0.03  1.0000
  -6 -18   0    3103     800                                                        3680   -2.15    0.02  1.0000
  -6 -18   0    4082     830                                                        4740   -2.15    0.02  1.0000
   7 -18   0    5282    1140                                                        5809    0.00   -1.54  1.0000
  -7  18   0    3754    1100                                                        4200    0.00    1.54  1.0000
  -7 -18   0    4405     900                                                        4900    0.01   -1.58  1.0000
  -7 -18   0    5994     980                                                        6569    0.01   -1.58  1.0000
   7  18   0    5832    1270                                                        6399    0.01    1.58  1.0000
   8  18   0    1419     990                                                        1180   -1.44    0.01  1.0000
   8 -18   0     562     880                                                         410   -1.50   -0.01  1.0000
  -8 -18   0     230     670                                                         140   -1.44   -0.01  1.0000
  -8  18   0     984     920                                                         780   -1.50    0.01  1.0000
  -8 -18   0     268     610                                                         170   -1.44   -0.01  1.0000
   9  18   0   10846    1680                                                       10369   -0.02    1.00  1.0000
  -9 -18   0   11040    1430                                                       10559   -0.02   -1.00  1.0000
  -9 -18   0   12358    1300                                                       11849   -0.02   -1.00  1.0000
  -9  18   0   11931    1540                                                       11429   -0.02    1.01  1.0000
   1  19   0     824     940                                                         680    0.00   -1.14  1.0000
  -1 -19   0     523     540                                                         410    0.00    1.14  1.0000
   1 -19   0      80     590                                                          40    0.00   -1.13  1.0000
  -1  19   0     612     910                                                         490    0.00    1.13  1.0000
   2  19   0   24381    1980                                                       21918    3.51   -0.02  1.0000
  -2  19   0   18831    1940                                                       16688   -3.49    0.02  1.0000
   2 -19   0   19799    1600                                                       17598   -3.49   -0.02  1.0000
  -2 -19   0   20092    1610                                                       17858    3.51    0.02  1.0000
  -3 -19   0    6524     970                                                        6739   -0.02   -0.57  1.0000
   3 -19   0    8394    1070                                                        8639    0.01    0.57  1.0000
  -3  19   0    9607    1100                                                        9869    0.01   -0.57  1.0000
   3  19   0    8169    1390                                                        8409   -0.02    0.57  1.0000
  -3  19   0    7615    1400                                                        7849    0.01   -0.57  1.0000
   4  19   0   10440    1540                                                        9929   -1.10   -0.01  1.0000
  -4  19   0   12139    1620                                                       11579    1.12    0.00  1.0000
  -4 -19   0   12794    1260                                                       12229   -1.10    0.01  1.0000
   4 -19   0   10941    1270                                                       10409    1.12    0.00  1.0000
  -5  19   0    1127     960                                                         930    0.01    1.32  1.0000
  -5 -19   0     723     600                                                         570   -0.02    1.30  1.0000
   5 -19   0      73     700                                                          30    0.01   -1.32  1.0000
   5  19   0    1905     940                                                        1650   -0.02   -1.30  1.0000
   6 -19   0     434     740                                                         520    0.85    0.00  1.0000
  -6  19   0       1     950                                                          10    0.85    0.00  1.0000
  -6 -19   0      78     650                                                         120   -0.92   -0.01  1.0000
   6  19   0       5     870                                                        -520   -0.92    0.01  1.0000
   7  19   0    6182    1320                                                        6319    0.00    0.37  1.0000
   7 -19   0    4874    1100                                                        4990    0.01    0.36  1.0000
  -7  19   0    3639    1280                                                        3740    0.01   -0.36  1.0000
  -7 -19   0    6519     960                                                        6659    0.00   -0.37  1.0000
   8  19   0    6092    1400                                                        5489    1.73    0.01  1.0000
  -8 -19   0    6270     970                                                        5659    1.73   -0.01  1.0000
  -8  19   0    4157    1240                                                        3670   -1.71    0.00  1.0000
   8 -19   0    6807    1210                                                        6179   -1.71    0.00  1.0000
  -8 -19   0    5711     980                                                        5129    1.73   -0.01  1.0000
   0  20   0    1924    1110                                                        2630    3.29    0.01  1.0000
   0 -20   0     998     660                                                        1520    3.29   -0.01  1.0000
  -1 -20   0    1344     680                                                        1340   -0.01    0.02  1.0000
   1  20   0     953    1000                                                         950   -0.01   -0.02  1.0000
  -1  20   0    1100    1050                                                        1100   -0.01    0.00  1.0000
   1 -20   0     460     630                                                         460   -0.01    0.00  1.0000
   2  20   0    1544    1020                                                        1750   -1.14    0.02  1.0000
  -2 -20   0     698     630                                                         840   -1.14   -0.02  1.0000
  -2  20   0       6     890                                                       -1020   -1.08    0.01  1.0000
   2 -20   0      65     590                                                         110   -1.08   -0.01  1.0000
   3 -20   0    3220     870                                                        3530    0.00    1.17  1.0000
  -3 -20   0    2337     730                                                        2610   -0.01    1.20  1.0000
  -3  20   0    3181    1150                                                        3490    0.00   -1.17  1.0000
   3  20   0    3909    1080                                                        4260   -0.01   -1.20  1.0000
   4 -20   0     638     710                                                         650   -0.10    0.01  1.0000
   4  20   0    3637    1130                                                        3660   -0.08   -0.01  1.0000
  -4 -20   0    1874     700                                                        1890   -0.08    0.01  1.0000
  -4  20   0    3472    1200                                                        3500   -0.10   -0.01  1.0000
  -4  20   0    2496     810                                                        2520   -0.10   -0.01  1.0000
   5  20   0    1766    1010                                                        1830   -0.03    0.32  1.0000
   5 -20   0    1864     900                                                        1920   -0.02   -0.28  1.0000
  -5 -20   0    2199     770                                                        2270   -0.03   -0.32  1.0000
  -5  20   0    1362    1100                                                        1410   -0.02    0.28  1.0000
   6  20   0    5792    1340                                                        6129    0.95   -0.01  1.0000
   6 -20   0    4553    1050                                                        4840    0.91    0.00  1.0000
  -6  20   0    2295    1250                                                        2500    0.91    0.00  1.0000
  -6 -20   0    6073     990                                                        6419    0.95    0.01  1.0000
   7  20   0     625    1040                                                         660   -0.01    0.30  1.0000
  -7  20   0       1    1070                                                        -310   -0.02    0.33  1.0000
   7 -20   0     323     880                                                         350   -0.02   -0.33  1.0000
  -7 -20   0    1349     770                                                        1400   -0.01   -0.30  1.0000
   1  21   0     446     980                                                         500    0.00    0.54  1.0000
  -1  21   0     955     970                                                        1030    0.00   -0.52  1.0000
   1 -21   0     345     680                                                         390    0.00    0.52  1.0000
  -1 -21   0       2     570                                                        -400    0.00   -0.54  1.0000
   2  21   0    1500     990                                                        1910   -2.16    0.02  1.0000
  -2 -21   0      53     650                                                         150   -2.16   -0.02  1.0000
   2 -21   0     100     640                                                         220    2.11    0.00  1.0000
  -2  21   0      24     970                                                        -310    2.11    0.00  1.0000
  -3 -21   0    1069     660                                                        1290    0.01    1.39  1.0000
  -3  21   0      10    1060                                                        -130   -0.01    1.37  1.0000
   3 -21   0      10     640                                                        -460   -0.01   -1.37  1.0000
   3  21   0      39     890                                                          90    0.01   -1.39  1.0000
  -4  21   0     672    1060                                                         930   -1.98   -0.02  1.0000
   4 -21   0    1308     810                                                        1660   -1.98    0.02  1.0000
  -4 -21   0     783     720                                                        1060    1.98   -0.02  1.0000
   4  21   0    1772    1110                                                        2180    1.98    0.02  1.0000
   5 -21   0    3596     980                                                        3700   -0.01   -0.37  1.0000
  -5 -21   0    3423     840                                                        3530    0.01    0.39  1.0000
  -5  21   0    4613    1000                                                        4730   -0.01    0.37  1.0000
   5  21   0    4487    1290                                                        4610    0.01   -0.39  1.0000
  -5  21   0    3379    1240                                                        3480   -0.01    0.37  1.0000
  -6  21   0    2699     960                                                        2990   -1.18    0.00  1.0000
   6  21   0    1064    1070                                                        1250    1.18   -0.01  1.0000
   6 -21   0    1129     950                                                        1320   -1.18    0.00  1.0000
  -6 -21   0     761     720                                                         920    1.18    0.01  1.0000
  -6  21   0     368    1190                                                         480   -1.18    0.00  1.0000
   0 -22   0       4     700                                                         -10   -0.85    0.00  1.0000
   0  22   0       4     980                                                        -160   -0.85    0.00  1.0000
   1 -22   0     597     730                                                         760    0.01   -1.35  1.0000
   1  22   0     701    1090                                                         880    0.03    1.37  1.0000
  -1 -22   0     128     630                                                         210    0.03   -1.37  1.0000
  -1  22   0    1424    1070                                                        1670    0.01    1.35  1.0000
  -2  22   0     349    1040                                                         310    0.47    0.00  1.0000
   2  22   0     242     950                                                         210    0.47    0.00  1.0000
  -2 -22   0     903     720                                                         840    0.47    0.00  1.0000
   2 -22   0     275     690                                                         240    0.47    0.00  1.0000
  -3  22   0      12    1120                                                        -520    0.01    1.46  1.0000
   3 -22   0     210     770                                                         320    0.01   -1.46  1.0000
   3  22   0      12     990                                                        -430    0.02    1.48  1.0000
  -3 -22   0     504     730                                                         670    0.02   -1.48  1.0000
  -4  22   0     908    1210                                                         990   -0.58    0.01  1.0000
   4  22   0     970    1100                                                        1050   -0.55    0.01  1.0000
  -4 -22   0       2     650                                                         -30   -0.55   -0.01  1.0000
   4 -22   0     164     760                                                         200   -0.58   -0.01  1.0000
   1   0   1      14     240                                                        2860   -0.02   24.02  1.0000
   1   0  -1      14     250                                                        3380   -0.03  -23.97  1.0000
  -1   0   1      33     250                                                        3670   -0.03   23.97  1.0000
  -1   0  -1       8     250                                                        3090   -0.02  -24.02  1.0000
 -11   0  -1    2357     540                                                        2340    0.00    0.08  1.0000
 -12   0   1     459     520                                                         480   -0.03   -0.21  1.0000
 -12   0  -1     216     490                                                         230    0.00   -0.22  1.0000
 -12   0  -1       0     500                                                        -510    0.00   -0.22  1.0000
 -13   0  -1    3597     840                                                        3500    0.00    0.35  1.0000
 -13   0   1    2564     720                                                        2480    0.00   -0.36  1.0000
 -14   0  -1      54     700                                                        -400    0.00   -3.15  1.0000
 -15   0  -1     328     810                                                         370    0.01    0.49  1.0000
 -15   0   1       1     790                                                        -540    0.01   -0.48  1.0000
   0   1  -1  408067    2230                                                       30667    0.08  199.92  1.0000
   0   1  -1  425262    2210                                                       35526    0.08  199.92  1.0000
   0  -1  -1  423951    2130                                                       35146   -0.04 -199.92  1.0000
   0   1   1  409583    2140                                                       31077   -0.04  199.92  1.0000
   0  -1   1  420573    2130                                                       34167    0.08 -199.92  1.0000
   0   1   1  424535    2240                                                       35306   -0.04  199.92  1.0000
  -1   1   1   19361     520                                                        8079   -0.80  -34.07  1.0000
   1  -1   1   17634     500                                                        6769   -0.77  -34.06  1.0000
  -1   1   1   19427     520                                                        8129   -0.80  -34.07  1.0000
  -1  -1  -1   19563     500                                                        8149   -0.57  -34.08  1.0000
  -1  -1  -1   19720     540                                                        8269   -0.57  -34.08  1.0000
  -1   1  -1   19527     520                                                        7699   -0.77   34.06  1.0000
  -1  -1   1   19062     520                                                        7289   -0.58   34.09  1.0000
  -1   1  -1   19418     540                                                        7619   -0.77   34.06  1.0000
   1   1   1   19489     550                                                        7599   -0.57   34.08  1.0000
   1   1   1   17573     500                                                        6219   -0.57   34.08  1.0000
  -2  -1   1   22849      90                                                          90   -1.89  -63.00  1.0000
  -2  -1   1   23224      80                                                         140   -1.89  -63.00  1.0000
   2   1   1   22683      70                                                          70    1.89   63.02  1.0000
  -2   1  -1   23397      80                                                         160    1.90   63.08  1.0000
  -3  -1  -1   46722    2430                                                       37756   -2.74  -10.89  1.0000
  -4  -1  -1   35535    2350                                                       36196    2.32  -27.31  1.0000
  -5  -1  -1    6787     610                                                        7709   -2.84   -2.13  1.0000
  -6  -1  -1   15934     910                                                       12109    2.43   -8.33  1.0000
  -7  -1  -1   48823    3200                                                       48665    0.23   -0.10  1.0000
  -8  -1  -1    1124     310                                                         610    2.65    3.79  1.0000
  -9  -1  -1    4841     600                                                        4970   -0.44    0.18  1.0000
  -9  -1   1    3836     600                                                        3960   -0.42   -0.21  1.0000
 -10  -1  -1    6707     620                                                        4060    0.21    7.87  1.0000
 -10  -1   1    7594     680                                                        4750   -0.19    7.88  1.0000
 -11  -1  -1    5088     730                                                        5529    0.14    2.45  1.0000
 -11   1  -1    5186     830                                                        5659    0.12   -2.44  1.0000
 -11  -1   1    5628     810                                                        6119    0.17   -2.50  1.0000
 -12  -1  -1    3292     680                                                        3710   -0.43    1.70  1.0000
 -12  -1  -1    3481     820                                                        3910   -0.43    1.70  1.0000
 -12   1  -1    2922     750                                                        3330   -0.42   -1.71  1.0000
 -12  -1   1    3758     740                                                        4220    0.44    1.70  1.0000
 -13   1   1    1693     650                                                        1740   -0.24    0.08  1.0000
 -13  -1  -1    1355     760                                                        1400   -0.25    0.09  1.0000
 -13  -1   1     865     620                                                         900   -0.25   -0.11  1.0000
 -13   1  -1    2208     740                                                        2260   -0.24   -0.10  1.0000
 -14  -1  -1    5760    1100                                                        6749   -0.23   -4.26  1.0000
 -14   1  -1    4923    1040                                                        5619   -0.27    4.24  1.0000
 -15  -1  -1      21     820                                                         -60   -0.64   -1.87  1.0000
   0  -2   1  166845   13759                                                      220418   26.28   -0.11  1.0000
   0  -2   1  163593   13749                                                      216678   26.28   -0.11  1.0000
   0   2   1  160004   14409                                                      212539  -26.27    0.09  1.0000
   0   2  -1  171187   14259                                                      225417   26.28    0.11  1.0000
   0   2  -1  163374   14399                                                      216438   26.28    0.11  1.0000
   0  -2  -1  164971   13739                                                      218268  -26.27   -0.09  1.0000
  -1  -2  -1   60738    3220                                                       43666    3.64   16.33  1.0000
   1   2  -1   60820    3280                                                       43786    3.67   16.28  1.0000
  -1   2   1   59467    3240                                                       42626   -3.78  -16.30  1.0000
  -1  -2  -1   61974    3100                                                       44716    3.64   16.33  1.0000
   1   2   1   71616    3280                                                       52945    3.64  -16.33  1.0000
   1  -2  -1   71267    3110                                                       52685   -3.78   16.30  1.0000
  -1   2  -1   68516    3250                                                       50305   -3.75   16.31  1.0000
   1   2   1   70942    3100                                                       52365    3.64  -16.33  1.0000
  -1  -2   1   73514    3120                                                       54635    3.67  -16.28  1.0000
   1  -2  -1   69289    3200                                                       50985   -3.78   16.30  1.0000
  -2   2   1  119854    8799                                                      147205  -18.13  -17.14  1.0000
  -2  -2  -1  125400    8409                                                      153365  -18.12  -17.21  1.0000
   2   2  -1  122035    8829                                                      149655   18.14   17.20  1.0000
   2   2   1  100767    8819                                                      124828  -18.12   17.21  1.0000
   2   2   1  100589    8399                                                      124628  -18.12   17.21  1.0000
  -2  -2   1  103013    8419                                                      127387   18.14  -17.20  1.0000
  -2   2  -1  100381    8809                                                      124368   18.10  -17.17  1.0000
  -2   2  -1   99580    8699                                                      123468   18.10  -17.17  1.0000
  -2  -2   1   99898    8399                                                      123888   18.14  -17.20  1.0000
  -3   2   1   22924    1760                                                       26837   -6.16   -9.29  1.0000
   3   2  -1   24308    1790                                                       28457    6.08    9.41  1.0000
  -3  -2  -1   24549    1690                                                       28737    6.06    9.42  1.0000
  -3  -2   1   18928    1700                                                       22598    6.08   -9.41  1.0000
  -3   2  -1   19188    1730                                                       22788   -6.15    9.29  1.0000
  -4  -2  -1   73512    5779                                                       96610   -4.44  -26.65  1.0000
  -4  -2   1   63269    5789                                                       84672    4.45  -26.63  1.0000
  -5  -2  -1   86389    5029                                                       82052   -2.90    3.51  1.0000
  -5  -2   1   78893    5039                                                       74763   -2.89   -3.52  1.0000
  -6  -2  -1    9850    1300                                                       19478   -1.50  -22.50  1.0000
  -6  -2   1    8642    1300                                                       17088    1.49  -22.52  1.0000
  -7  -2  -1   86712    6189                                                       91741   -0.79   -4.15  1.0000
  -7  -2   1   95915    6229                                                      101300   -0.79    4.17  1.0000
  -8  -2  -1   57927    3980                                                       57664    1.20   -0.58  1.0000
  -8  -2   1   64568    4030                                                       64274   -1.19   -0.59  1.0000
  -9  -2  -1    1527     440                                                        1870   -0.09    2.37  1.0000
  -9  -2   1    3031     520                                                        3500   -0.10   -2.36  1.0000
 -10  -2  -1   15806    1500                                                       19098    1.54   -5.80  1.0000
 -10  -2   1   15527    1520                                                       18888   -1.54   -5.79  1.0000
 -10   2  -1   15481    1560                                                       18828   -1.49   -5.81  1.0000
 -11  -2  -1   12334    1070                                                       12149    0.46    0.22  1.0000
 -11  -2   1    9071    1050                                                        8899    0.48   -0.22  1.0000
 -11   2  -1   11330    1110                                                       11139   -0.46    0.23  1.0000
 -12  -2  -1    2539     650                                                        2730    0.85   -0.18  1.0000
 -12   2  -1    3815     740                                                        4060   -0.87   -0.19  1.0000
 -12  -2   1    3582     730                                                        3810   -0.84   -0.20  1.0000
 -13  -2  -1    6116    1090                                                        6089   -0.78   -0.53  1.0000
 -13   2  -1    9704    1080                                                        9709    0.78   -0.54  1.0000
 -13  -2   1    6351     960                                                        6349   -0.79    0.53  1.0000
 -14  -2  -1   11224    1480                                                       12679   -0.03    3.27  1.0000
 -15  -2  -1    3052    1020                                                        3070    0.23    0.03  1.0000
   0   3   1   20022    2450                                                       35086   -0.04 -141.52  1.0000
   0  -3  -1   19566    2310                                                       35696   -0.04  141.52  1.0000
   0   3  -1   19973    2440                                                       35156   -0.01 -141.53  1.0000
   0  -3  -1   18996    2380                                                       36476   -0.04  141.52  1.0000
   0  -3   1   17984    2320                                                       37916   -0.01  141.53  1.0000
  -1   3   1   73412    6189                                                       83092    5.28   21.94  1.0000
  -1  -3  -1   70024    5899                                                       79652    5.10   21.99  1.0000
   1  -3   1   72786    5899                                                       82432    5.25   21.92  1.0000
   1   3  -1   71517    6209                                                       81232    5.13   21.98  1.0000
  -1  -3   1   91474    5919                                                      105219    5.13  -21.98  1.0000
   1   3   1   89585    6229                                                      103210    5.10  -21.99  1.0000
   1   3   1   87146    5909                                                      100560    5.10  -21.99  1.0000
  -1   3  -1   89623    6199                                                      103020    5.25  -21.92  1.0000
   1  -3  -1   89498    5919                                                      102870    5.28  -21.94  1.0000
   2   3  -1  267668   25487                                                      368443    5.59  -40.69  1.0000
   2  -3   1  230636   24298                                                      324948   -5.67   40.76  1.0000
  -2  -3  -1  268179   24298                                                      369083   -5.58   40.71  1.0000
  -2   3   1  265403   25447                                                      366033    5.69  -40.74  1.0000
   2   3   1  291372   24318                                                      397550   -5.58  -40.71  1.0000
  -2   3  -1  290611   25187                                                      396910   -5.67  -40.76  1.0000
   2   3   1  298243   25497                                                      405579   -5.58  -40.71  1.0000
  -2  -3   1  308638   24328                                                      417658    5.59   40.69  1.0000
   2  -3  -1  297064   24318                                                      404420    5.69   40.74  1.0000
  -2   3  -1  302223   25467                                                      410479   -5.67  -40.76  1.0000
  -3  -3  -1  508169   33177                                                      516188    4.46    4.95  1.0000
   3   3  -1  494952   34777                                                      502850    4.44    4.92  1.0000
  -3   3   1  493922   34747                                                      502260    4.58    4.90  1.0000
   3   3   1  530970   33197                                                      537516    4.46   -4.95  1.0000
  -3   3  -1  540208   34407                                                      547255    4.58   -4.90  1.0000
  -3  -3   1  531264   33197                                                      537806    4.44   -4.92  1.0000
  -3   3  -1  532839   34767                                                      539836    4.58   -4.90  1.0000
  -3  -3   1  531662   33197                                                      538206    4.44   -4.92  1.0000
   3   3   1  514865   34787                                                      521308    4.46   -4.95  1.0000
   4   3  -1   37553    2110                                                       26537    8.06  -20.86  1.0000
  -4   3   1   38016    2090                                                       26907    8.10  -20.86  1.0000
  -4  -3  -1   38151    2000                                                       27047   -8.07   20.86  1.0000
  -4   3  -1   48295    2060                                                       33697   -8.10  -20.88  1.0000
  -4   3  -1   49165    2130                                                       34437   -8.10  -20.88  1.0000
  -4  -3   1   49868    2040                                                       35076    8.06   20.86  1.0000
  -5   3   1   74143    4890                                                       71073    5.78    2.80  1.0000
  -5  -3  -1   73503    4670                                                       70403    5.87    2.84  1.0000
  -5   3  -1   78053    4830                                                       75392    5.80   -2.81  1.0000
  -5  -3   1   76973    4700                                                       74303    5.86   -2.85  1.0000
  -6   3   1    4296     540                                                        4980    7.08   -5.94  1.0000
  -6  -3  -1    4361     520                                                        5069   -7.14    5.95  1.0000
  -6  -3   1    5125     580                                                        6309    7.14    5.97  1.0000
  -7  -3  -1   17458    1350                                                       17308    0.54    0.76  1.0000
  -7  -3   1   20818    1400                                                       20758    0.52   -0.74  1.0000
  -8  -3  -1  155440   10709                                                      168043   -6.50   -3.57  1.0000
  -8  -3   1  155983   10739                                                      167653    6.44   -3.57  1.0000
  -9  -3  -1   26905    1750                                                       27247    1.10   -0.47  1.0000
  -9  -3   1   21408    1760                                                       21878    1.09    0.49  1.0000
  -9   3  -1   22121    1790                                                       22598    1.08    0.48  1.0000
 -10  -3  -1    4133     790                                                        6089   -0.70   -6.19  1.0000
 -10   3  -1    6866     900                                                        9389   -0.70    6.19  1.0000
 -10  -3   1    6924     930                                                        9459    0.71   -6.19  1.0000
 -11  -3  -1   15212    1400                                                       14769   -1.16   -1.26  1.0000
 -11  -3   1   19330    1500                                                       18798   -1.19    1.28  1.0000
 -11   3  -1   19841    1510                                                       19308   -1.18    1.27  1.0000
 -12  -3  -1   14707    1320                                                       14529    1.16   -1.30  1.0000
 -12  -3   1   15755    1370                                                       15518   -1.16   -1.28  1.0000
 -12   3  -1   14145    1380                                                       13939    1.14    1.31  1.0000
 -13   3   1    4272     820                                                        4230    0.24    0.48  1.0000
 -13  -3  -1    5043     970                                                        4980    0.29    0.48  1.0000
 -13  -3   1    6470     900                                                        6449    0.28   -0.43  1.0000
 -14   3   1   24692    2070                                                       23298   -0.82   -3.47  1.0000
 -14  -3  -1   27962    2160                                                       26477    0.81    3.51  1.0000
 -14   3  -1   22177    2080                                                       21308    0.84   -3.47  1.0000
 -15  -3  -1   17050    1850                                                       18098    1.27    1.65  1.0000
 -15   3  -1   13450    1660                                                       14169    1.25   -1.63  1.0000
   0   4  -1     688     970                                                       12409  -38.53   -0.10  1.0000
   0   4   1     628     990                                                       12099   38.53   -0.13  1.0000
   0  -4  -1     882     890                                                       13299   38.53    0.13  1.0000
   0  -4  -1     974     900                                                       13689   38.53    0.13  1.0000
   0  -4   1     951     890                                                       13579  -38.53    0.10  1.0000
   1  -4   1  282154   17408                                                      288901    1.04    2.59  1.0000
   1   4  -1  282925   18288                                                      289611   -0.86   -2.59  1.0000
  -1   4   1  287257   18248                                                      294141    1.05    2.61  1.0000
  -1  -4  -1  281935   17408                                                      288591   -0.85   -2.58  1.0000
   1   4   1  257475   17418                                                      263854   -0.85    2.58  1.0000
   1  -4  -1  258743   17408                                                      265303    1.05   -2.61  1.0000
  -1   4  -1  263773   18248                                                      270323    1.04   -2.59  1.0000
   1   4   1  253336   18268                                                      259664   -0.85    2.58  1.0000
   1  -4  -1  269557   18028                                                      276252    1.05   -2.61  1.0000
  -1  -4   1  257744   17418                                                      264144   -0.86    2.59  1.0000
  -2   4   1   75675    3230                                                       52275   28.85    4.22  1.0000
   2  -4   1   73292    3080                                                       50285  -28.82   -4.22  1.0000
   2   4  -1   73881    3290                                                       50855  -28.87   -4.37  1.0000
  -2  -4  -1   73033    3080                                                       50165   28.83    4.37  1.0000
   2   4   1   62054    3050                                                       42416   28.83   -4.37  1.0000
  -2   4  -1   66384    3230                                                       46005  -28.82    4.22  1.0000
  -2  -4   1   66881    3090                                                       46505  -28.87    4.37  1.0000
   2  -4  -1   66752    3090                                                       46295   28.85   -4.22  1.0000
   2   4   1   66676    3270                                                       46355   28.83   -4.37  1.0000
  -3   4   1  140900    9369                                                      145905    5.15    6.66  1.0000
   3   4  -1  144039    9429                                                      149115   -5.21   -6.83  1.0000
   3  -4   1  140209    8959                                                      145215    5.15    6.63  1.0000
  -3  -4  -1  145463    8959                                                      150565   -5.20   -6.79  1.0000
   3   4   1  133304    8909                                                      137676   -5.20    6.79  1.0000
  -3   4  -1  129007    9379                                                      133317    5.15   -6.63  1.0000
   3  -4  -1  128689    8969                                                      132977    5.15   -6.66  1.0000
  -3   4  -1  131433    9239                                                      135786    5.15   -6.63  1.0000
   3   4   1  135584    9419                                                      139996   -5.20    6.79  1.0000
  -3  -4   1  138868    8969                                                      143336   -5.21    6.83  1.0000
   4  -4   1   43764    1720                                                       24718   -8.62  -21.67  1.0000
   4   4  -1   46246    1850                                                       26597   -8.65  -21.67  1.0000
  -4  -4  -1   50113    1730                                                       29557    8.63   21.67  1.0000
  -4   4   1   52140    1810                                                       31127    8.65   21.67  1.0000
  -4   4  -1   42598    1800                                                       23818   -8.62   21.67  1.0000
  -4  -4   1   42507    1740                                                       23748   -8.65   21.67  1.0000
   4   4   1   42054    1840                                                       23408    8.63  -21.67  1.0000
  -4  -4   1   44365    1660                                                       25147   -8.65   21.67  1.0000
  -4   4  -1   43516    1740                                                       24508   -8.62   21.67  1.0000
   5   4  -1   76605    5639                                                       80752    2.08   -2.49  1.0000
  -5  -4  -1   76495    5339                                                       80642    2.07   -2.50  1.0000
  -5   4   1   75758    5589                                                       79822   -2.09    2.41  1.0000
  -5   4  -1   80585    5499                                                       84862   -2.09   -2.44  1.0000
  -5  -4   1   83400    5369                                                       87791    2.08    2.49  1.0000
  -5  -4   1   76816    5289                                                       81032    2.08    2.49  1.0000
  -5   4  -1   83898    5619                                                       88261   -2.09   -2.44  1.0000
  -6   4   1  137055   10489                                                      170143    1.77   20.18  1.0000
  -6  -4  -1  136566   10019                                                      169493    1.74   20.14  1.0000
  -6   4  -1  113351   10339                                                      142616   -1.76   20.14  1.0000
  -6   4  -1  120363   10489                                                      150485   -1.76   20.14  1.0000
  -6  -4   1  124107   10029                                                      154665   -1.72   20.16  1.0000
  -7   4   1   74583    4870                                                       71243   -0.06   -4.31  1.0000
  -7  -4  -1   71735    4650                                                       68503    0.02    4.30  1.0000
  -7  -4   1   76525    4680                                                       73613    0.03   -4.33  1.0000
  -7   4  -1   76363    4890                                                       73413   -0.11    4.26  1.0000
  -7   4  -1   74681    4800                                                       71763   -0.11    4.26  1.0000
  -8  -4  -1   63776    4020                                                       61014   -2.46   -3.59  1.0000
  -8   4   1   64365    4210                                                       61604   -2.41   -3.55  1.0000
  -8  -4   1   62891    4040                                                       60044    2.42   -3.58  1.0000
  -8   4  -1   64344    4130                                                       61474    2.43   -3.58  1.0000
  -8   4  -1   64047    4230                                                       61184    2.43   -3.58  1.0000
  -9   4   1   24250    1670                                                       21518   -1.54    3.61  1.0000
  -9  -4  -1   23569    1590                                                       20878    1.52   -3.61  1.0000
  -9   4  -1   25192    1630                                                       22408   -1.56   -3.61  1.0000
  -9   4  -1   22484    1700                                                       19858   -1.56   -3.61  1.0000
  -9  -4   1   25751    1650                                                       22938    1.53    3.61  1.0000
 -10   4   1    1591     600                                                        2660   -2.33    4.74  1.0000
 -10   4  -1    3462     720                                                        5019    2.33    4.71  1.0000
 -10   4  -1    3754     650                                                        5369    2.33    4.71  1.0000
 -10  -4   1    3643     700                                                        5249    2.34    4.75  1.0000
 -11   4   1   18782    1530                                                       18158    0.88    0.51  1.0000
 -11  -4  -1   21025    1460                                                       20388   -0.87   -0.44  1.0000
 -11  -4   1   16604    1430                                                       16078   -0.88    0.46  1.0000
 -11   4  -1   15974    1540                                                       15458    0.88   -0.42  1.0000
 -11   4  -1   18332    1510                                                       17778    0.88   -0.42  1.0000
 -12  -4  -1   21279    1550                                                       20568   -1.47    1.41  1.0000
 -12   4   1   20548    1640                                                       19808   -1.53    1.40  1.0000
 -12  -4   1   15467    1540                                                       14649    1.48    1.41  1.0000
 -12   4  -1   19137    1680                                                       18208    1.51    1.40  1.0000
 -13  -4  -1    3202     920                                                        3240    0.00    0.66  1.0000
 -13   4   1    2839     740                                                        2880    0.02   -0.66  1.0000
 -13  -4   1    4883     830                                                        4970    0.01   -0.64  1.0000
 -13   4  -1    4662     850                                                        4760    0.02    0.69  1.0000
 -14  -4  -1   26448    2210                                                       24338    0.11   -2.85  1.0000
 -14   4   1   26848    2070                                                       24648    0.09   -2.95  1.0000
 -14   4  -1   23238    2060                                                       21198   -0.09   -2.94  1.0000
 -15  -4  -1    9826    1400                                                        9449   -0.85   -1.08  1.0000
 -15   4  -1   10851    1340                                                       10439    0.85   -1.11  1.0000
   0   5  -1  134030   18058                                                      272453   -0.24   67.29  1.0000
   0  -5  -1  138839   17828                                                      279302    0.19  -67.29  1.0000
   0   5   1  129623   18058                                                      266183    0.19   67.29  1.0000
   0  -5   1  133131   17208                                                      271193   -0.24  -67.29  1.0000
   0  -5  -1  135378   17208                                                      274383    0.19  -67.29  1.0000
  -1  -5  -1  275026   19698                                                      309289  -11.93  -10.40  1.0000
  -1   5   1  268397   20648                                                      302060  -11.68  -10.41  1.0000
   1   5  -1  273183   20688                                                      307369  -11.93  -10.41  1.0000
   1  -5   1  269020   19698                                                      302650  -11.69  -10.37  1.0000
  -1  -5   1  283842   19708                                                      318848  -11.93   10.41  1.0000
  -1   5  -1  282147   20648                                                      316738  -11.69   10.37  1.0000
   1  -5  -1  288022   20388                                                      323038  -11.68   10.41  1.0000
   1   5   1  280567   20688                                                      315338  -11.93   10.40  1.0000
   1   5   1  280925   19708                                                      315718  -11.93   10.40  1.0000
   2  -5   1  121535    6499                                                      101810    7.63  -10.22  1.0000
  -2   5   1  123150    6809                                                      103260   -7.67   10.22  1.0000
  -2  -5  -1  122169    6499                                                      102420    7.56  -10.26  1.0000
   2   5  -1  123724    6869                                                      103800   -7.60   10.26  1.0000
   2   5   1  120963    6469                                                      101260    7.56   10.26  1.0000
   2   5   1  121597    6859                                                      101840    7.56   10.26  1.0000
  -2  -5   1  124035    6519                                                      104030   -7.60  -10.26  1.0000
  -2   5  -1  118146    6809                                                       98660    7.63   10.22  1.0000
   2  -5  -1  122679    6509                                                      102780   -7.67  -10.22  1.0000
  -3   5   1   35742    2360                                                       33607   -3.95    0.65  1.0000
  -3  -5  -1   37246    2260                                                       35146   -3.82    0.61  1.0000
   3  -5   1   35669    2270                                                       33547   -3.95    0.63  1.0000
   3   5  -1   35921    2420                                                       33817   -3.81    0.67  1.0000
  -3   5  -1   36215    2270                                                       34127   -3.95   -0.63  1.0000
   3   5   1   35407    2420                                                       33407   -3.82   -0.61  1.0000
   3   5   1   36415    2190                                                       34387   -3.82   -0.61  1.0000
   3  -5  -1   37594    2280                                                       35456   -3.95   -0.65  1.0000
  -3   5  -1   36802    2380                                                       34697   -3.95   -0.63  1.0000
  -3  -5   1   39080    2290                                                       36936   -3.81   -0.67  1.0000
   4  -5   1  103453    6159                                                       91011   13.17   -9.07  1.0000
  -4  -5  -1  106847    6149                                                       94281   13.11   -9.01  1.0000
  -4   5   1  106461    6429                                                       93881  -13.18    9.05  1.0000
   4   5  -1  100485    6489                                                       88311  -13.12    8.99  1.0000
  -4   5  -1  115396    6459                                                      102260   13.17    9.07  1.0000
   4  -5  -1  108799    6179                                                       96060  -13.18   -9.05  1.0000
   4   5   1  112930    6509                                                      100000   13.11    9.01  1.0000
  -4   5  -1  113079    6319                                                      100070   13.17    9.07  1.0000
  -4  -5   1  113837    6179                                                      100890  -13.12   -8.99  1.0000
   5   5  -1   20479    1760                                                       20678   -6.31    0.58  1.0000
  -5  -5  -1   20043    1620                                                       20248   -6.28    0.59  1.0000
  -5   5   1   19881    1680                                                       20068   -6.23    0.57  1.0000
  -5  -5   1   27328    1670                                                       27587   -6.31   -0.58  1.0000
   5   5   1   25215    1790                                                       25467   -6.28   -0.59  1.0000
  -5   5  -1   25549    1740                                                       25807   -6.22   -0.60  1.0000
  -5  -5   1   24474    1550                                                       24708   -6.31   -0.58  1.0000
  -5   5  -1   26243    1640                                                       26507   -6.22   -0.60  1.0000
   6   5  -1  151295   10589                                                      151395  -10.28    4.49  1.0000
  -6  -5  -1  159615   10059                                                      159694   10.27   -4.46  1.0000
  -6   5   1  155972   10519                                                      156174  -10.24    4.53  1.0000
  -6  -5   1  158603    9999                                                      158524  -10.28   -4.49  1.0000
  -6  -5   1  162186   10089                                                      162114  -10.28   -4.49  1.0000
  -6   5  -1  158569   10379                                                      158554   10.24    4.51  1.0000
  -6   5  -1  159207   10539                                                      159194   10.24    4.51  1.0000
  -7   5   1   51811    3660                                                       52495   -1.10   -0.27  1.0000
  -7  -5  -1   49673    3500                                                       50415   -1.21   -0.31  1.0000
  -7  -5   1   52338    3420                                                       53075   -1.17    0.29  1.0000
  -7   5  -1   55336    3690                                                       56074   -1.19    0.26  1.0000
  -7  -5   1   52239    3520                                                       52975   -1.17    0.29  1.0000
  -7   5  -1   53073    3580                                                       53795   -1.19    0.26  1.0000
  -8  -5  -1   98971    5479                                                       90251    7.41    1.77  1.0000
  -8   5   1   96730    5729                                                       88301   -7.23   -1.71  1.0000
  -8  -5   1   87466    5479                                                       79852   -7.31    1.75  1.0000
  -8   5  -1   89045    5739                                                       81132    7.49   -1.72  1.0000
  -8   5  -1   89600    5619                                                       81662    7.49   -1.72  1.0000
  -9  -5  -1    1285     400                                                        1130   -1.09   -0.37  1.0000
  -9   5   1    1384     420                                                        1210   -1.17   -0.34  1.0000
  -9  -5   1    1313     440                                                        1180   -1.12    0.35  1.0000
  -9   5  -1    1446     380                                                        1310   -1.09    0.33  1.0000
  -9   5  -1    1802     450                                                        1650   -1.09    0.33  1.0000
 -10  -5  -1   33296    2400                                                       34237    1.09    3.85  1.0000
 -10   5   1   38017    2530                                                       39026   -1.09   -3.84  1.0000
 -10  -5   1   31157    2420                                                       32227   -1.09    3.87  1.0000
 -10   5  -1   29894    2410                                                       30907    1.11   -3.83  1.0000
 -10   5  -1   32921    2550                                                       33987    1.11   -3.83  1.0000
 -11  -5  -1   15349    1380                                                       15558    1.92    0.23  1.0000
 -11   5   1   14904    1450                                                       15128    1.94    0.26  1.0000
 -11   5  -1   17034    1530                                                       17278    1.94   -0.27  1.0000
 -11  -5   1   18312    1440                                                       18548    1.91   -0.24  1.0000
 -12  -5  -1   34174    2550                                                       34287   -1.13    0.51  1.0000
 -12   5   1   32907    2670                                                       33027    1.10   -0.48  1.0000
 -12   5  -1   39567    2760                                                       39716   -1.09   -0.48  1.0000
 -12  -5   1   35417    2600                                                       35546    1.12    0.51  1.0000
 -13  -5  -1    2254     840                                                        2320    0.01   -0.34  1.0000
 -13   5   1    2158     670                                                        2230    0.08   -0.34  1.0000
 -13   5  -1     439     630                                                         470    0.07    0.32  1.0000
 -13  -5   1    1158     630                                                        1200    0.02    0.30  1.0000
 -14  -5  -1    8904    1330                                                        9029   -1.17   -2.02  1.0000
 -14   5  -1    7851    1140                                                        7859   -1.19    2.01  1.0000
 -15  -5  -1    2503    1000                                                        2480   -0.75   -1.28  1.0000
 -15   5  -1    1637     810                                                        1680   -0.72    1.28  1.0000
   0   6   1   79289    2810                                                       40736  -34.55    0.08  1.0000
   0  -6  -1   77095    2630                                                       39146  -34.55   -0.08  1.0000
   0   6  -1   79436    2820                                                       40826   34.55    0.05  1.0000
   0  -6   1   78929    2640                                                       40476   34.55   -0.05  1.0000
   0  -6  -1   79555    2690                                                       40906  -34.55   -0.08  1.0000
   1   6  -1  139255    8889                                                      150255   -2.49   -5.77  1.0000
  -1  -6  -1  130967    8409                                                      141766   -2.48   -5.85  1.0000
  -1   6   1  133232    8849                                                      144056    2.59    5.77  1.0000
   1  -6   1  132837    8409                                                      143746    2.56    5.84  1.0000
   1   6   1  112639    8859                                                      122718   -2.48    5.85  1.0000
  -1   6  -1  117344    8819                                                      127667    2.56   -5.84  1.0000
  -1  -6   1  115556    8409                                                      125647   -2.49    5.77  1.0000
   1  -6  -1  113024    8399                                                      123068    2.59   -5.77  1.0000
   1  -6  -1  116043    8659                                                      126217    2.59   -5.77  1.0000
   1   6   1  111671    8389                                                      121708   -2.48    5.85  1.0000
  -2  -6  -1  130241   10899                                                      170973  -28.89    8.04  1.0000
  -2   6   1  129449   11429                                                      169963  -28.89    8.17  1.0000
   2   6  -1  127769   11489                                                      168093   28.87   -8.02  1.0000
   2  -6   1  128000   10909                                                      168313   28.91   -8.19  1.0000
   2  -6  -1  130098   10909                                                      172103  -28.89   -8.17  1.0000
  -2  -6   1  131644   10909                                                      173953   28.87    8.02  1.0000
   2   6   1  131923   10879                                                      174303  -28.89   -8.04  1.0000
  -2   6  -1  131113   11429                                                      173303   28.91    8.19  1.0000
   2   6   1  134742   11479                                                      177562  -28.89   -8.04  1.0000
   3   6  -1  157827   10499                                                      153505    1.94    1.49  1.0000
  -3  -6  -1  158004    9959                                                      153755    1.94    1.44  1.0000
  -3   6   1  156700   10429                                                      152625   -1.85   -1.40  1.0000
   3  -6   1  158521    9969                                                      154505   -1.87   -1.32  1.0000
  -3  -6   1  167076    9979                                                      162604    1.94   -1.49  1.0000
   3  -6  -1  166256    9989                                                      162034   -1.85    1.40  1.0000
   3   6   1  152828    9909                                                      148625    1.94   -1.44  1.0000
   3   6   1  165853   10509                                                      161474    1.94   -1.44  1.0000
  -3   6  -1  169766   10449                                                      165583   -1.87    1.32  1.0000
   4   6  -1    8691     890                                                       11599   10.48    8.51  1.0000
  -4   6   1    8999     780                                                       11979  -10.51   -8.56  1.0000
   4  -6   1    8373     780                                                       11209   10.47    8.54  1.0000
  -4  -6  -1    8922     770                                                       11869  -10.46   -8.49  1.0000
  -4   6  -1    6611     650                                                        8089   10.47   -8.54  1.0000
  -4   6  -1    6857     760                                                        8379   10.47   -8.54  1.0000
   4   6   1    6860     880                                                        8389  -10.46    8.49  1.0000
  -4  -6   1    7139     740                                                        8719   10.48   -8.51  1.0000
   4  -6  -1    6339     740                                                        7779  -10.51    8.56  1.0000
  -5  -6  -1   26302    1800                                                       24348   -2.54    0.76  1.0000
  -5   6   1   27701    1880                                                       25707    2.54   -0.72  1.0000
   5  -6   1   23145    1790                                                       21358    2.48   -0.73  1.0000
   5   6  -1   25925    1950                                                       23958   -2.58    0.77  1.0000
  -5  -6   1   29651    1840                                                       27547   -2.58   -0.77  1.0000
   5   6   1   31632    1990                                                       29487   -2.54   -0.76  1.0000
  -5   6  -1   32218    1920                                                       30107    2.48    0.73  1.0000
  -5   6  -1   31339    1790                                                       29257    2.48    0.73  1.0000
   6   6  -1   74728    3490                                                       62334    1.12   10.37  1.0000
  -6  -6   1   56993    3230                                                       46385    1.12  -10.37  1.0000
  -6   6  -1   59323    3360                                                       48455    1.18  -10.38  1.0000
   6   6   1   55708    3430                                                       45255   -1.12   10.34  1.0000
  -6  -6   1   56804    3100                                                       46215    1.12  -10.37  1.0000
  -6   6  -1   58116    3250                                                       47365    1.18  -10.38  1.0000
  -7  -6  -1   76740    5029                                                       77702   -0.10   -2.70  1.0000
  -7   6   1   77871    5249                                                       78892    0.14    2.71  1.0000
  -7   6  -1   75261    5139                                                       75752    0.15   -2.68  1.0000
  -7  -6   1   79108    5059                                                       79582   -0.12    2.71  1.0000
  -7   6  -1   74903    5269                                                       75392    0.15   -2.68  1.0000
  -8   6   1    7239     660                                                        5249    3.63    8.24  1.0000
  -8  -6  -1    6854     630                                                        4920    3.61    8.26  1.0000
  -8  -6   1   10307     780                                                        8519   -3.61    8.24  1.0000
  -8   6  -1    8964     760                                                        7269   -3.64    8.27  1.0000
  -8   6  -1    8649     640                                                        6979   -3.64    8.27  1.0000
  -9   6   1    1676     390                                                         950    1.59   -4.08  1.0000
  -9  -6  -1    2388     430                                                        1500   -1.61    4.08  1.0000
  -9   6  -1    1069     420                                                         510    1.62    4.10  1.0000
  -9  -6   1    1261     400                                                         650   -1.60   -4.06  1.0000
  -9   6  -1    1595     340                                                         890    1.62    4.10  1.0000
 -10  -6  -1   38300    2430                                                       34857    2.62   -2.91  1.0000
 -10   6   1   37182    2540                                                       33797    2.63   -2.89  1.0000
 -10   6  -1   38085    2550                                                       34627   -2.66   -2.86  1.0000
 -10  -6   1   37374    2440                                                       33957   -2.60   -2.91  1.0000
 -11   6   1   21590    1660                                                       22548   -1.34   -0.43  1.0000
 -11  -6  -1   19347    1560                                                       20228    1.32    0.38  1.0000
 -11  -6   1   17345    1550                                                       18198    1.32   -0.39  1.0000
 -11   6  -1   15610    1640                                                       16428   -1.34    0.37  1.0000
 -12   6   1   10029    1040                                                        9839    1.86   -2.31  1.0000
 -12  -6  -1    8799     970                                                        8599    1.81   -2.32  1.0000
 -12  -6   1    7424     980                                                        7479   -1.82   -2.31  1.0000
 -12   6  -1    8214    1030                                                        8279   -1.84   -2.31  1.0000
 -13   6   1    6319     950                                                        5979   -0.80    0.49  1.0000
 -13  -6  -1    5839    1080                                                        5509    0.80   -0.51  1.0000
 -13   6  -1   10232    1090                                                        9799   -0.80   -0.53  1.0000
 -13  -6   1    7799     990                                                        7439    0.81    0.47  1.0000
 -14  -6  -1    5209    1080                                                        5029    0.46    1.50  1.0000
 -14   6  -1    5210     940                                                        5099   -0.48    1.53  1.0000
 -15  -6  -1     448     940                                                         590    1.18    1.35  1.0000
 -15   6  -1     737     780                                                         920   -1.18    1.36  1.0000
   0   7   1     447     340                                                         150   -0.41  -14.07  1.0000
   0  -7   1     364     180                                                         210    0.53   14.06  1.0000
   0   7  -1     205     320                                                         430    0.53  -14.06  1.0000
   0  -7  -1     221     190                                                         400   -0.41   14.07  1.0000
   0  -7  -1     333     140                                                         250   -0.41   14.07  1.0000
   1   7  -1   91852    6329                                                       93511   14.52    4.67  1.0000
  -1  -7  -1   88066    5959                                                       89751   14.56    4.61  1.0000
   1  -7   1   88946    5969                                                       90151   13.90    4.69  1.0000
  -1   7   1   89154    6289                                                       90311   13.86    4.71  1.0000
   1   7   1   94923    5949                                                       96260   14.56   -4.61  1.0000
  -1   7  -1   93104    6289                                                       93931   13.90   -4.69  1.0000
  -1  -7   1   93522    5979                                                       94751   14.52   -4.67  1.0000
   1  -7  -1   91225    5969                                                       91981   13.86   -4.71  1.0000
   1   7   1   98346    6339                                                       99730   14.56   -4.61  1.0000
   1  -7  -1   93046    6119                                                       93821   13.86   -4.71  1.0000
  -2  -7  -1   33752    2960                                                       41686   -6.59  -15.43  1.0000
   2   7  -1   36036    3200                                                       44256    6.59   15.43  1.0000
   2  -7   1   33525    2960                                                       41456   -6.52  -15.42  1.0000
  -2   7   1   32618    3120                                                       40436    6.52   15.42  1.0000
   2   7   1   39016    2930                                                       48025   -6.59   15.43  1.0000
   2   7   1   38972    3190                                                       47975   -6.59   15.43  1.0000
  -2   7  -1   38602    3130                                                       47585   -6.52   15.42  1.0000
   2  -7  -1   39453    2980                                                       48545    6.52  -15.42  1.0000
  -2  -7   1   39695    2980                                                       48785    6.59  -15.43  1.0000
   3   7  -1   49260    3280                                                       45515    5.64   -4.14  1.0000
  -3  -7  -1   53188    3050                                                       49285    5.63   -4.09  1.0000
   3  -7   1   53931    3060                                                       49975    5.68   -4.13  1.0000
  -3   7   1   52528    3200                                                       48625    5.69   -4.16  1.0000
   3   7   1   47346    2980                                                       42806    5.63    4.09  1.0000
   3   7   1   52357    3290                                                       47585    5.63    4.09  1.0000
   3  -7  -1   49042    3060                                                       44386    5.69    4.16  1.0000
  -3   7  -1   52195    3200                                                       47395    5.68    4.13  1.0000
  -3  -7   1   49583    3050                                                       44946    5.64    4.14  1.0000
  -4  -7  -1   53021    3730                                                       53445  -13.05   -5.62  1.0000
  -4   7   1   53641    3900                                                       54125   13.13    5.61  1.0000
   4  -7   1   53464    3750                                                       53955  -13.14   -5.60  1.0000
   4   7  -1   53439    3990                                                       53835   13.05    5.65  1.0000
  -4   7  -1   63480    3940                                                       63454  -13.14    5.60  1.0000
  -4  -7   1   61297    3760                                                       61154   13.05   -5.65  1.0000
   4  -7  -1   60219    3770                                                       60154   13.13   -5.61  1.0000
   4   7   1   59912    4000                                                       59794  -13.05    5.62  1.0000
   5   7  -1   22435    2170                                                       27907    7.05   -5.92  1.0000
  -5  -7  -1   22768    1990                                                       28267    7.04   -5.94  1.0000
   5  -7   1   20447    2000                                                       25677    7.05   -5.94  1.0000
  -5   7   1   23108    2060                                                       28657    7.05   -5.90  1.0000
  -5  -7   1   25241    2020                                                       31247    7.05    5.92  1.0000
   5   7   1   24463    2180                                                       30367    7.04    5.94  1.0000
   5  -7  -1   22615    2010                                                       28307    7.05    5.90  1.0000
  -5   7  -1   25536    2090                                                       31577    7.05    5.94  1.0000
  -5   7  -1   23978    1940                                                       29837    7.05    5.94  1.0000
  -6  -7  -1   30167    1870                                                       26507  -10.04    5.10  1.0000
  -6   7   1   34549    1990                                                       30627    9.98   -5.14  1.0000
   6   7  -1   35373    2120                                                       31417    9.98   -5.13  1.0000
   6   7   1   30124    2070                                                       26497  -10.04   -5.10  1.0000
  -6  -7   1   30143    1910                                                       26487    9.98    5.13  1.0000
  -6   7  -1   29449    1840                                                       25847  -10.10   -5.12  1.0000
  -6   7  -1   29195    1980                                                       25607  -10.10   -5.12  1.0000
  -7  -7  -1   14965    1250                                                       15248   -0.29   -0.70  1.0000
  -7   7   1   16351    1320                                                       16618   -0.34   -0.68  1.0000
   7   7  -1   15078    1440                                                       15348   -0.31   -0.69  1.0000
   7   7   1   16356    1470                                                       16668   -0.29    0.70  1.0000
  -7   7  -1   16450    1190                                                       16768   -0.27    0.71  1.0000
  -7  -7   1   17578    1280                                                       17888   -0.31    0.69  1.0000
  -7   7  -1   16281    1320                                                       16598   -0.27    0.71  1.0000
  -8   7   1    6131     750                                                        7609    6.03   -1.92  1.0000
  -8  -7  -1    6139     720                                                        7609   -6.16    1.84  1.0000
  -8   7  -1    4010     700                                                        5329   -6.31   -1.87  1.0000
  -8  -7   1    4649     740                                                        6029    6.05    1.86  1.0000
  -9  -7  -1   14014    1130                                                       13679    0.16    1.13  1.0000
  -9   7   1   15232    1230                                                       14839    0.27    1.09  1.0000
  -9  -7   1   13607    1210                                                       13389    0.20   -1.11  1.0000
  -9   7  -1   13665    1210                                                       13449    0.20   -1.10  1.0000
 -10  -7  -1   15208    1240                                                       15358   -1.14   -2.45  1.0000
 -10   7   1   13563    1270                                                       13699    1.14    2.48  1.0000
 -10   7  -1   13933    1330                                                       13869   -1.17    2.46  1.0000
 -10  -7   1   13712    1220                                                       13619    1.13   -2.49  1.0000
 -11  -7  -1    5731     750                                                        5549   -1.28   -0.03  1.0000
 -11   7   1    6335     790                                                        6139   -1.24   -0.06  1.0000
 -11   7  -1    5995     840                                                        5789   -1.27    0.06  1.0000
 -11  -7   1    4819     770                                                        4640   -1.25    0.04  1.0000
 -12   7   1    2779     670                                                        2750   -0.16    0.09  1.0000
 -12  -7  -1    3012     640                                                        2970    0.21   -0.10  1.0000
 -12  -7   1    4385     750                                                        4340   -0.18   -0.11  1.0000
 -12   7  -1    3995     770                                                        3950    0.18    0.08  1.0000
 -13  -7  -1    1936     900                                                        1930   -0.05   -0.07  1.0000
 -13   7   1    3289     740                                                        3270   -0.09   -0.08  1.0000
 -13   7  -1    4459     820                                                        4440   -0.10    0.07  1.0000
 -13  -7   1    2179     710                                                        2180   -0.04    0.09  1.0000
 -14  -7  -1    1656     970                                                        1820    0.92    0.99  1.0000
 -14   7  -1    1460     770                                                        1610    0.94   -1.00  1.0000
 -15  -7  -1    5545    1200                                                        5579   -0.01    0.78  1.0000
 -15   7  -1    4214     990                                                        4300   -0.05   -0.77  1.0000
   0   8  -1    3019    1040                                                       11409  -22.35   -0.04  1.0000
   0  -8  -1    2927     890                                                       11229   22.35    0.01  1.0000
   0   8   1    3448    1050                                                       12229   22.35   -0.01  1.0000
   0  -8  -1    3174     840                                                       11709   22.35    0.01  1.0000
   0  -8   1    2801     870                                                       10979  -22.35    0.04  1.0000
  -1  -8  -1    3083     440                                                        4040    3.30    9.68  1.0000
  -1   8   1    2435     570                                                        3300   -3.57   -9.60  1.0000
  -1  -8  -1    2873     410                                                        3780    3.30    9.68  1.0000
   1   8  -1    2808     600                                                        3700    3.31    9.59  1.0000
   1  -8   1    2903     440                                                        3890   -3.55   -9.67  1.0000
  -1  -8   1    3475     450                                                        4400    3.31   -9.59  1.0000
  -1   8  -1    3387     570                                                        4370   -3.55    9.67  1.0000
   1  -8  -1    3915     480                                                        5009   -3.57    9.60  1.0000
   1   8   1    3852     430                                                        4850    3.30   -9.68  1.0000
   1   8   1    3088     590                                                        3930    3.30   -9.68  1.0000
   1  -8  -1    3526     370                                                        4540   -3.57    9.60  1.0000
  -2  -8  -1   19057    2150                                                       33467   20.51  -15.32  1.0000
  -2   8   1   18500    2310                                                       32737   20.53  -15.35  1.0000
   2  -8   1   19046    2170                                                       33497  -20.60   15.34  1.0000
   2   8  -1   19785    2420                                                       34447  -20.46   15.32  1.0000
  -2  -8   1   16252    2150                                                       29617  -20.46  -15.32  1.0000
   2   8   1   17343    2110                                                       31147   20.51   15.32  1.0000
  -2   8  -1   18390    2290                                                       32637  -20.60  -15.34  1.0000
   2  -8  -1   17068    2160                                                       30797   20.53   15.35  1.0000
   2   8   1   17885    2370                                                       31897   20.51   15.32  1.0000
   3  -8   1   15621    1140                                                       14759    0.14   -2.02  1.0000
   3   8  -1   16295    1360                                                       15478   -0.27    1.99  1.0000
  -3   8   1   16174    1220                                                       15308    0.11   -1.98  1.0000
   3   8  -1   14849    1010                                                       14069   -0.27    1.99  1.0000
  -3  -8  -1   14485    1110                                                       13719   -0.29    1.99  1.0000
  -3   8  -1   17594    1210                                                       16688    0.14    2.02  1.0000
   3   8   1   16700    1310                                                       15888   -0.29   -1.99  1.0000
   3  -8  -1   16977    1150                                                       16098    0.11    1.98  1.0000
   3   8   1   17960    1060                                                       17118   -0.29   -1.99  1.0000
  -3  -8   1   16829    1160                                                       16008   -0.27   -1.99  1.0000
   4   8  -1    9397     800                                                        6369   -7.91    6.33  1.0000
   4  -8   1    9802     660                                                        6719   -7.91    6.30  1.0000
  -4   8   1    9367     670                                                        6369    7.92   -6.26  1.0000
  -4  -8  -1   10363     640                                                        7169    7.88   -6.36  1.0000
  -4   8  -1   11422     710                                                        8099   -7.91   -6.30  1.0000
   4   8   1   11966     840                                                        8539    7.88    6.36  1.0000
   4  -8  -1    9157     670                                                        6199    7.92    6.26  1.0000
  -4  -8   1   10859     710                                                        7609   -7.91   -6.33  1.0000
  -5  -8  -1     971     260                                                         400    5.70   -0.55  1.0000
   5  -8   1    1249     310                                                         590   -5.65    0.60  1.0000
  -5   8   1    1690     330                                                         910   -5.71    0.59  1.0000
   5   8  -1    2078     450                                                        1210    5.73   -0.55  1.0000
   5  -8  -1     646     280                                                         220   -5.71   -0.59  1.0000
  -5   8  -1    1526     330                                                         860   -5.65   -0.60  1.0000
  -5  -8   1    1185     310                                                         600    5.73    0.55  1.0000
   5   8   1     864     380                                                         370    5.70    0.55  1.0000
   6   8  -1     389     450                                                         400   -0.96    1.62  1.0000
  -6   8   1     370     330                                                         380    0.98   -1.63  1.0000
   6  -8   1     656     330                                                         680   -1.00    1.71  1.0000
  -6  -8  -1     140     300                                                         140    0.97   -1.70  1.0000
  -6  -8   1     704     320                                                         730   -0.96   -1.62  1.0000
   6   8   1     487     430                                                         510    0.97    1.70  1.0000
  -6   8  -1     326     320                                                         340   -1.00   -1.71  1.0000
  -7  -8  -1    4125     510                                                        3970    2.18    1.88  1.0000
   7   8  -1    3362     660                                                        3210    2.22    1.87  1.0000
  -7   8   1    3473     500                                                        3320   -2.22   -1.88  1.0000
   7   8   1    2998     640                                                        2890    2.18   -1.88  1.0000
  -7  -8   1    2995     510                                                        2880    2.22   -1.87  1.0000
  -7   8  -1    3121     500                                                        3010   -2.19    1.87  1.0000
  -8   8   1    2189     640                                                        4550   -3.15  -10.66  1.0000
   8   8  -1    2692     820                                                        5269    3.11   10.62  1.0000
  -8  -8  -1    2682     640                                                        5259   -3.09  -10.66  1.0000
  -8  -8   1    3256     680                                                        5969    3.11  -10.62  1.0000
  -8   8  -1    2922     680                                                        5519    3.13  -10.69  1.0000
  -9   8   1    8857    1030                                                       10169   -0.31    3.10  1.0000
  -9  -8  -1    9873     950                                                       11259    0.33   -3.10  1.0000
  -9  -8   1    7986     990                                                        9229    0.32    3.09  1.0000
  -9   8  -1    8506    1020                                                        9799   -0.32   -3.12  1.0000
 -10   8   1    5646     830                                                        6659   -2.50    1.23  1.0000
 -10  -8  -1    6893     820                                                        7999   -2.47    1.23  1.0000
 -10   8  -1    5017     840                                                        5979    2.54    1.22  1.0000
 -10  -8   1    5653     830                                                        6639    2.44    1.22  1.0000
 -11   8   1     465     510                                                         610    1.65    0.84  1.0000
 -11  -8  -1     578     470                                                         740   -1.65   -0.85  1.0000
 -11  -8   1     342     480                                                         480   -1.66    0.81  1.0000
 -11   8  -1     364     510                                                         510    1.65   -0.86  1.0000
 -12  -8  -1    1184     570                                                        1590   -1.89    1.70  1.0000
 -12   8   1    2209     660                                                        2760   -1.94    1.69  1.0000
 -12   8  -1    1637     670                                                        2110    1.92    1.67  1.0000
 -12  -8   1     584     600                                                         880    1.91    1.70  1.0000
 -13   8   1     269     600                                                         200    0.94   -0.27  1.0000
 -13  -8  -1       6     730                                                        -600   -0.98    0.28  1.0000
 -13   8  -1     407     640                                                         320    0.94    0.28  1.0000
 -13  -8   1     711     640                                                         590   -0.99   -0.28  1.0000
 -14  -8  -1     707     890                                                         840   -1.07   -0.35  1.0000
 -14   8  -1    1837     770                                                        2050    1.06   -0.32  1.0000
   0   9  -1    5337    1010                                                       10489   -0.59  -12.65  1.0000
   0  -9   1    5003     810                                                       10019   -0.59   12.65  1.0000
   0   9   1    4633     990                                                        9489    0.46  -12.64  1.0000
   0  -9  -1    5554     810                                                       10789    0.46   12.64  1.0000
   0  -9  -1    4459     750                                                        9239    0.46   12.64  1.0000
   1   9  -1    4378     540                                                        2250  -13.89   -1.86  1.0000
  -1  -9  -1    4572     320                                                        2420  -13.92   -1.80  1.0000
   1  -9   1    4248     370                                                        2170  -13.29   -1.83  1.0000
  -1  -9  -1    3990     340                                                        1950  -13.92   -1.80  1.0000
  -1   9   1    5853     550                                                        3470  -13.27   -1.87  1.0000
   1  -9  -1    4511     250                                                        2360  -13.27    1.87  1.0000
   1   9   1    4328     320                                                        2210  -13.92    1.80  1.0000
   1   9   1    4476     550                                                        2330  -13.92    1.80  1.0000
  -1  -9   1    3892     340                                                        1850  -13.89    1.86  1.0000
   1  -9  -1    3955     340                                                        1920  -13.27    1.87  1.0000
  -1   9  -1    4162     480                                                        2090  -13.29    1.83  1.0000
  -2   9   1    2002    1140                                                       12949   -3.84  -29.61  1.0000
   2   9  -1    2016    1210                                                       13029   -3.92  -29.68  1.0000
  -2  -9  -1    1935     960                                                       12799    3.95   29.63  1.0000
   2  -9   1    1949     850                                                       12789    3.85   29.56  1.0000
   2  -9   1    2035     980                                                       13009    3.85   29.56  1.0000
   2   9   1    1910    1220                                                       12719    3.95  -29.63  1.0000
  -2   9  -1    1463    1070                                                       11469    3.85  -29.56  1.0000
   2   9   1    1353     930                                                       11199    3.95  -29.63  1.0000
  -2  -9   1    1991    1000                                                       12949   -3.92   29.68  1.0000
   2  -9  -1    1911     980                                                       12699   -3.84   29.61  1.0000
  -3   9   1    2894     630                                                        5519   -6.09    6.83  1.0000
   3   9  -1    2909     750                                                        5499   -5.96    6.76  1.0000
   3   9  -1    2678     440                                                        5179   -5.96    6.76  1.0000
  -3  -9  -1    3010     570                                                        5639   -5.96    6.76  1.0000
   3  -9   1    3571     610                                                        6439   -6.06    6.83  1.0000
  -3  -9   1    2570     570                                                        5059   -5.96   -6.76  1.0000
   3   9   1    2798     470                                                        5379   -5.96   -6.76  1.0000
   3  -9  -1    3022     600                                                        5729   -6.09   -6.83  1.0000
   3   9   1    2226     700                                                        4570   -5.96   -6.76  1.0000
  -3   9  -1    2531     600                                                        5039   -6.06   -6.83  1.0000
   4  -9   1    1732     630                                                        6149    8.84   15.51  1.0000
  -4   9   1    1169     610                                                        4950   -8.79  -15.52  1.0000
   4   9  -1    1422     770                                                        5469   -8.70  -15.49  1.0000
  -4  -9  -1    1403     570                                                        5429    8.72   15.46  1.0000
  -4  -9   1    1608     580                                                        5669   -8.70   15.49  1.0000
   4   9   1    1453     730                                                        5349    8.72  -15.46  1.0000
  -4   9  -1    1114     590                                                        4650    8.84  -15.51  1.0000
   4  -9  -1     839     560                                                        3970   -8.79   15.52  1.0000
   5  -9   1    7571     890                                                       10829   -5.85    7.88  1.0000
   5   9  -1    6156    1050                                                        9089   -5.83    7.86  1.0000
  -5   9   1    6263     930                                                        9229   -5.77    7.87  1.0000
  -5  -9  -1    6201     840                                                        9149   -5.90    7.87  1.0000
  -5   9  -1    6204     900                                                        9159   -5.85   -7.88  1.0000
   5   9   1    6893    1080                                                        9999   -5.90   -7.87  1.0000
  -5  -9   1    8269     920                                                       11659   -5.83   -7.86  1.0000
   5  -9  -1    6801     910                                                        9889   -5.77   -7.87  1.0000
  -6   9   1    3960     670                                                        5949   -6.81    6.01  1.0000
   6   9  -1    3117     810                                                        4890   -6.86    6.05  1.0000
   6  -9   1    4257     740                                                        6489    7.26   -6.02  1.0000
  -6  -9  -1    4247     650                                                        6459    7.22   -6.05  1.0000
  -6  -9   1    3701     660                                                        5789   -6.86   -6.05  1.0000
  -6   9  -1    4055     710                                                        6389    7.26    6.02  1.0000
   6   9   1    3726     830                                                        5949    7.22    6.05  1.0000
   6  -9  -1    4401     720                                                        6659   -6.81   -6.01  1.0000
   7   9  -1    3523     690                                                        3280    1.31    0.60  1.0000
  -7  -9  -1    2410     450                                                        2200    1.36    0.61  1.0000
  -7   9   1    3140     520                                                        2900    1.34    0.57  1.0000
  -7  -9   1    2618     480                                                        2420    1.31   -0.60  1.0000
  -7   9  -1    3093     540                                                        2860    1.39   -0.59  1.0000
   7   9   1    4335     720                                                        4070    1.36   -0.61  1.0000
   8   9  -1     680     580                                                        1120   -4.10    4.38  1.0000
  -8  -9  -1    1898     500                                                        2710    4.20   -4.35  1.0000
  -8   9   1     970     450                                                        1510   -4.09    4.40  1.0000
  -8  -9   1    1830     530                                                        2730   -4.10   -4.38  1.0000
  -8   9  -1     817     460                                                        1440    4.28    4.34  1.0000
   8   9   1     927     600                                                        1580    4.20    4.35  1.0000
  -9   9   1    1759     470                                                        1560    0.64   -0.93  1.0000
  -9  -9  -1    1311     450                                                        1140    0.70   -0.92  1.0000
  -9  -9   1     119     440                                                          70    0.69    0.93  1.0000
  -9   9  -1    1601     540                                                        1410    0.67    0.93  1.0000
 -10  -9  -1     529     460                                                         700    0.84    1.61  1.0000
 -10   9   1     389     450                                                         540   -0.87   -1.62  1.0000
 -10  -9   1     589     460                                                         770   -0.85    1.60  1.0000
 -10   9  -1      27     460                                                          70    0.88   -1.65  1.0000
 -11   9   1    3284     670                                                        3200    1.23    0.12  1.0000
 -11  -9  -1    3455     660                                                        3380    1.23    0.16  1.0000
 -11   9  -1    3027     690                                                        2950    1.24   -0.13  1.0000
 -11  -9   1    4055     700                                                        3970    1.23   -0.14  1.0000
 -12  -9  -1    1055     750                                                        1020    0.51   -0.65  1.0000
 -12   9   1     570     580                                                         550   -0.55    0.60  1.0000
 -12  -9  -1       4     530                                                        -170    0.51   -0.65  1.0000
 -12  -9   1    1552     630                                                        1510   -0.53   -0.64  1.0000
 -12   9  -1     565     610                                                         540    0.52    0.61  1.0000
 -13   9   1    1816     690                                                        1780    0.19   -0.06  1.0000
 -13  -9  -1    1133     870                                                        1110    0.14   -0.07  1.0000
 -13  -9   1     818     630                                                         800    0.13    0.06  1.0000
 -13   9  -1    1232     640                                                        1200    0.20    0.08  1.0000
 -14  -9  -1     127     920                                                         140   -0.49   -1.10  1.0000
 -14   9  -1       8     670                                                        -330   -0.51    1.10  1.0000
   0 -10  -1   12969    1290                                                       18338   -9.27    0.08  1.0000
   0 -10  -1   12315    1320                                                       17558   -9.27    0.08  1.0000
   0  10  -1   13728    1560                                                       19238    9.27   -0.03  1.0000
   0 -10   1   12399    1320                                                       17658    9.27    0.03  1.0000
   0  10   1   12937    1530                                                       18298   -9.27   -0.08  1.0000
  -1  10   1   16308    1690                                                       18328    5.03   10.50  1.0000
   1  10  -1   18526    1750                                                       20718   -5.03  -10.58  1.0000
  -1 -10  -1   20266    1520                                                       22588   -5.03  -10.61  1.0000
  -1 -10  -1   19483    1510                                                       21748   -5.03  -10.61  1.0000
   1 -10   1   18830    1520                                                       21058    5.04   10.54  1.0000
   1  10   1   19122    1490                                                       20568   -5.03   10.61  1.0000
  -1  10  -1   17301    1740                                                       18658    5.04  -10.54  1.0000
   1 -10  -1   19777    1520                                                       21268    5.03  -10.50  1.0000
  -1 -10   1   20476    1520                                                       21998   -5.03   10.58  1.0000
   1  10   1   20638    1790                                                       22168   -5.03   10.61  1.0000
   1 -10  -1   20734    1460                                                       22278    5.03  -10.50  1.0000
   2  10  -1   10791    1620                                                       18468    9.35  -18.96  1.0000
   2 -10   1    9500    1170                                                       16688    9.42  -18.84  1.0000
  -2 -10  -1   10769    1280                                                       18428   -9.34   18.93  1.0000
  -2  10   1    8881    1440                                                       15818   -9.41   18.87  1.0000
   2 -10   1    9686    1290                                                       16948    9.42  -18.84  1.0000
  -2  10  -1    9504    1430                                                       18158    9.42   18.84  1.0000
   2 -10  -1    8692    1180                                                       16988   -9.41  -18.87  1.0000
  -2 -10   1    9269    1290                                                       17818    9.35   18.96  1.0000
   2  10   1    8616    1250                                                       16858   -9.34  -18.93  1.0000
   2 -10  -1    9548    1300                                                       18228   -9.41  -18.87  1.0000
   2  10   1   10985    1530                                                       20248   -9.34  -18.93  1.0000
   3  10  -1    2941     250                                                        2130   -2.11   -2.76  1.0000
  -3 -10  -1    1964     350                                                        1320   -2.10   -2.72  1.0000
   3 -10   1    2900     400                                                        2090    2.31    2.65  1.0000
   3  10  -1    2491     600                                                        1750   -2.11   -2.76  1.0000
  -3  10   1    2396     470                                                        1660    2.30    2.69  1.0000
  -3 -10   1    2681     380                                                        1910   -2.11    2.76  1.0000
  -3  10  -1    2664     440                                                        1890    2.31   -2.65  1.0000
   3  10   1    3640     610                                                        2740   -2.10    2.72  1.0000
   3  10   1    3270     320                                                        2420   -2.10    2.72  1.0000
   3 -10  -1    2529     390                                                        1770    2.30   -2.69  1.0000
  -4 -10  -1   34747    2100                                                       29827   -2.92   14.64  1.0000
   4 -10   1   36345    2130                                                       31317    2.93  -14.70  1.0000
   4  10  -1   34848    2350                                                       29957    2.95  -14.61  1.0000
  -4  10   1   34360    2210                                                       29447   -2.91   14.68  1.0000
   4  10   1   33266    2320                                                       29477   -2.92  -14.64  1.0000
  -4 -10   1   34858    2110                                                       31037    2.95   14.61  1.0000
  -4  10  -1   32880    2210                                                       29097    2.93   14.70  1.0000
   4 -10  -1   35522    2140                                                       31627   -2.91  -14.68  1.0000
  -5  10   1   16948    1170                                                       12699    7.45   -1.14  1.0000
  -5 -10  -1   17164    1090                                                       12899   -7.42    1.14  1.0000
   5  10  -1   14833    1270                                                       10899   -7.40    1.12  1.0000
   5 -10   1   17110    1140                                                       12819    7.48   -1.17  1.0000
  -5  10  -1   18214    1190                                                       13839    7.48    1.17  1.0000
   5 -10  -1   18279    1130                                                       13919    7.45    1.14  1.0000
  -5 -10   1   19005    1140                                                       14579   -7.40   -1.12  1.0000
   5  10   1   17255    1280                                                       13039   -7.42   -1.14  1.0000
  -6  10   1    2072     430                                                         950   -1.18    7.68  1.0000
   6 -10   1    2404     410                                                        1180    1.19   -7.77  1.0000
  -6 -10  -1    2438     410                                                        1210   -1.19    7.70  1.0000
   6  10  -1    2178     560                                                        1030    1.19   -7.62  1.0000
   6 -10  -1    2265     460                                                         970   -1.18   -7.68  1.0000
  -6 -10   1    2477     420                                                        1120    1.19    7.62  1.0000
   6  10   1    2088     550                                                         850   -1.19   -7.70  1.0000
  -6  10  -1    2490     440                                                        1110    1.19    7.77  1.0000
   7  10  -1    4065     820                                                        4680   -3.74   -1.80  1.0000
  -7 -10  -1    4622     630                                                        5289   -3.76   -1.82  1.0000
   7 -10   1    5394     750                                                        6129    3.75    1.85  1.0000
  -7  10   1    4975     700                                                        5669    3.73    1.82  1.0000
  -7  10  -1    3307     660                                                        3890    3.75   -1.85  1.0000
   7  10   1    3324     790                                                        3900   -3.76    1.82  1.0000
  -7 -10   1    3844     660                                                        4460   -3.74    1.80  1.0000
   8  10  -1    2876     730                                                        2620   -0.71  -10.79  1.0000
  -8  10   1    2425     530                                                        2130    0.73   10.80  1.0000
  -8 -10  -1    2594     510                                                        2320    0.70   10.81  1.0000
  -8 -10   1    2112     520                                                        2180   -0.71   10.79  1.0000
  -8  10  -1    1994     560                                                        2040   -0.71   10.81  1.0000
   8  10   1    1256     600                                                        1130    0.70  -10.81  1.0000
  -9 -10  -1    6102     760                                                        5689    0.31    1.69  1.0000
  -9  10   1    7301     830                                                        6839   -0.29   -1.71  1.0000
   9  10  -1    8060    1070                                                        7579    0.31    1.71  1.0000
  -9 -10   1    6609     770                                                        6179    0.31   -1.71  1.0000
  -9  10  -1    6957     830                                                        6519   -0.32    1.71  1.0000
 -10 -10  -1    3722     650                                                        3340    1.60    0.38  1.0000
 -10  10   1    3422     670                                                        3040    1.69    0.38  1.0000
 -10 -10   1    3379     660                                                        2990   -1.63    0.38  1.0000
 -10  10  -1    4855     740                                                        4390   -1.65    0.35  1.0000
 -11  10   1   10529    1130                                                       10809   -1.57   -1.14  1.0000
 -11 -10  -1    9237    1040                                                        9499    1.58    1.16  1.0000
 -11 -10   1   10491    1120                                                       10699    1.58   -1.11  1.0000
 -11  10  -1    9062    1110                                                        9239   -1.58    1.17  1.0000
 -12 -10  -1    3683     960                                                        4140    1.65   -0.71  1.0000
 -12 -10  -1    4032     770                                                        4510    1.65   -0.71  1.0000
 -12  10   1    3727     820                                                        4220    1.76   -0.71  1.0000
 -12 -10   1    3915     800                                                        4460   -1.73   -0.72  1.0000
 -12  10  -1    3652     800                                                        4170   -1.71   -0.68  1.0000
 -13  10   1    1548     720                                                        1660   -1.18    0.02  1.0000
 -13 -10  -1    1875     940                                                        2000    1.18   -0.02  1.0000
 -13  10  -1     945     720                                                        1050   -1.17    0.00  1.0000
 -13 -10   1    1347     670                                                        1480    1.18    0.05  1.0000
 -14 -10  -1     428     850                                                         410    0.73   -0.33  1.0000
 -14  10  -1     408     750                                                         390   -0.74   -0.36  1.0000
   0  11   1    1020     290                                                         540   -0.28   21.70  1.0000
   0 -11   1    1134     330                                                         430    0.35  -21.71  1.0000
   0  11   1    1002     540                                                         560   -0.28   21.70  1.0000
   0 -11  -1     972     220                                                         490   -0.28  -21.70  1.0000
   0  11  -1     752     520                                                         740    0.35   21.71  1.0000
   0 -11  -1     863     300                                                         600   -0.28  -21.70  1.0000
   1 -11   1   10048    1010                                                       14019   12.84    1.05  1.0000
  -1 -11  -1   10233     980                                                       14329   13.12    1.13  1.0000
   1  11  -1   10452    1350                                                       14579   13.11    1.16  1.0000
  -1  11   1    8867    1220                                                       12569   12.86    1.10  1.0000
  -1 -11  -1   10340    1050                                                       14459   13.12    1.13  1.0000
  -1 -11   1    7484     990                                                       10729   13.11   -1.16  1.0000
  -1  11  -1    8855    1240                                                       12359   12.84   -1.05  1.0000
   1  11   1    7892    1220                                                       11249   13.12   -1.13  1.0000
   1  11   1    7344     970                                                       10569   13.12   -1.13  1.0000
   1 -11  -1    7836     880                                                       11099   12.86   -1.10  1.0000
   1 -11  -1    7950    1010                                                       11239   12.86   -1.10  1.0000
  -2  11   1   18808     770                                                        6179    0.56   31.36  1.0000
   2 -11   1   19776     630                                                        6799   -0.55  -31.32  1.0000
   2  11  -1   18364     850                                                        5889    0.54   31.39  1.0000
  -2 -11  -1   20054     610                                                        6969   -0.54  -31.35  1.0000
  -2 -11  -1   19945     610                                                        6899   -0.54  -31.35  1.0000
  -2 -11   1   14608     540                                                        4050    0.54  -31.39  1.0000
   2  11   1   13402     740                                                        3340   -0.54   31.35  1.0000
  -2  11  -1   14085     670                                                        3750   -0.55   31.32  1.0000
   2  11   1   14229     480                                                        3830   -0.54   31.35  1.0000
   2 -11  -1   14010     370                                                        3700    0.56  -31.36  1.0000
   2 -11  -1   13554     540                                                        3430    0.56  -31.36  1.0000
  -3  11   1   23201    1590                                                       18338    4.09   -6.83  1.0000
   3  11  -1   26091    1790                                                       20938    3.89   -6.82  1.0000
   3 -11   1   22859    1450                                                       18008    4.11   -6.87  1.0000
  -3 -11  -1   23198    1440                                                       18328    3.90   -6.86  1.0000
   3  11  -1   23047    1320                                                       18218    3.89   -6.82  1.0000
   3 -11  -1   26612    1510                                                       21388    4.09    6.83  1.0000
  -3  11  -1   27968    1620                                                       22578    4.11    6.87  1.0000
   3  11   1   24510    1680                                                       19498    3.90    6.86  1.0000
   3  11   1   26778    1390                                                       21528    3.90    6.86  1.0000
  -3 -11   1   23832    1450                                                       18918    3.89    6.82  1.0000
  -4  11   1   23741    1320                                                       15618    3.74   16.27  1.0000
  -4 -11  -1   24362    1240                                                       16188   -3.79  -16.19  1.0000
   4  11  -1   23927    1490                                                       15788    3.71   16.21  1.0000
   4 -11   1   24907    1250                                                       16628   -3.87  -16.26  1.0000
  -4  11  -1   23382    1350                                                       15178   -3.87   16.26  1.0000
  -4 -11   1   21815    1210                                                       13879    3.71  -16.21  1.0000
   4 -11  -1   22256    1240                                                       14219    3.74  -16.27  1.0000
   4  11   1   23085    1490                                                       14949   -3.79   16.19  1.0000
   5 -11   1   27586    1710                                                       22588    2.56   -6.56  1.0000
   5  11  -1   26765    1890                                                       21858    2.50   -6.55  1.0000
  -5  11   1   27787    1760                                                       22778    2.38   -6.57  1.0000
  -5 -11  -1   25684    1610                                                       20858    2.66   -6.57  1.0000
   5 -11  -1   26983    1680                                                       22048    2.38    6.57  1.0000
   5  11   1   24887    1840                                                       20138    2.66    6.57  1.0000
  -5 -11   1   28578    1640                                                       23498    2.50    6.55  1.0000
  -5  11  -1   26836    1770                                                       21908    2.56    6.56  1.0000
  -6  11   1   17446    1310                                                       14609    3.16   -5.35  1.0000
   6 -11   1   16430    1280                                                       13759   -4.00    5.36  1.0000
   6  11  -1   15989    1460                                                       13269    3.29   -5.39  1.0000
  -6 -11  -1   17175    1220                                                       14419   -3.97    5.41  1.0000
  -6  11  -1   17888    1340                                                       15088   -4.00   -5.36  1.0000
   6  11   1   18523    1530                                                       15648   -3.97   -5.41  1.0000
  -6 -11   1   17158    1200                                                       14329    3.29    5.39  1.0000
   6 -11  -1   18088    1270                                                       15188    3.16    5.35  1.0000
   7 -11   1    1679     560                                                        1820   -1.04    0.24  1.0000
  -7 -11  -1    1407     480                                                        1530   -0.96    0.25  1.0000
   7  11  -1    1008     670                                                        1100   -0.82    0.24  1.0000
  -7  11   1    1195     500                                                        1300   -0.87    0.25  1.0000
   7  11   1    1385     670                                                        1530   -0.96   -0.25  1.0000
  -7 -11   1    1670     470                                                        1810   -0.82   -0.24  1.0000
  -7  11  -1    1386     540                                                        1540   -1.04   -0.24  1.0000
   7 -11  -1    2328     600                                                        2500   -0.87   -0.25  1.0000
  -8  11   1    4908     790                                                        6139    2.01   -3.37  1.0000
   8  11  -1    5146     990                                                        6419    2.06   -3.40  1.0000
  -8 -11  -1    4319     710                                                        5489   -2.16    3.38  1.0000
   8  11   1    4358     940                                                        5539   -2.16   -3.38  1.0000
  -8 -11   1    5652     810                                                        6989    2.06    3.40  1.0000
  -8  11  -1    4520     780                                                        5709   -2.14   -3.35  1.0000
  -9  11   1    7650     960                                                        8169   -0.44    1.18  1.0000
  -9 -11  -1    7272     900                                                        7769   -0.45    1.15  1.0000
   9  11  -1    8462    1220                                                        8999   -0.43    1.16  1.0000
  -9 -11   1    7755     940                                                        8269   -0.43   -1.16  1.0000
  -9  11  -1    6772     930                                                        7259   -0.46   -1.16  1.0000
   9  11   1    8008    1150                                                        8529   -0.45   -1.15  1.0000
 -10 -11  -1    3527     630                                                        3410   -0.13   -0.56  1.0000
 -10  11   1    4002     720                                                        3880    0.15    0.57  1.0000
 -10  11  -1    2756     700                                                        2640   -0.13    0.59  1.0000
 -10 -11   1    2837     640                                                        2730    0.14   -0.55  1.0000
 -11 -11  -1   21470    2000                                                       21278   -1.57   -0.22  1.0000
 -11  11   1   22315    1860                                                       22158   -1.66   -0.16  1.0000
 -11 -11  -1   22736    1830                                                       22538   -1.57   -0.22  1.0000
 -11  11  -1   23235    1910                                                       23068   -1.63    0.17  1.0000
 -11 -11   1   23135    1830                                                       22948   -1.59    0.20  1.0000
 -12 -11  -1    6953    1110                                                        6109   -0.40    2.22  1.0000
 -12 -11  -1    7401     880                                                        6529   -0.40    2.22  1.0000
 -12  11   1    7135     960                                                        6289    0.42   -2.19  1.0000
 -12 -11   1    7110     890                                                        6259    0.39    2.21  1.0000
 -12  11  -1    6930    1000                                                        6099   -0.42   -2.18  1.0000
 -13 -11  -1       2     860                                                        -170   -0.44    0.31  1.0000
 -13  11  -1       2     700                                                        -220   -0.51   -0.29  1.0000
 -13 -11   1     542     650                                                         540   -0.46   -0.29  1.0000
   0 -12  -1   12688    1110                                                       13239   -1.05   -0.13  1.0000
   0  12   1   13663    1090                                                       14239   -1.05    0.13  1.0000
   0  12   1   11490    1310                                                       12019   -1.05    0.13  1.0000
   0  12  -1   13552    1400                                                       14119    1.04    0.11  1.0000
   0 -12   1   12676    1090                                                       13229    1.04   -0.11  1.0000
   0 -12  -1   12620    1020                                                       13169   -1.05   -0.13  1.0000
  -1 -12  -1   33401    1940                                                       27787    6.04    7.69  1.0000
  -1  12   1   33049    2190                                                       27607   -5.86   -7.62  1.0000
  -1 -12  -1   35603    1950                                                       29807    6.04    7.69  1.0000
   1 -12   1   32358    1950                                                       26967   -5.87   -7.59  1.0000
   1  12  -1   31606    2230                                                       26157    6.02    7.73  1.0000
   1 -12  -1   31645    1880                                                       27337   -5.86    7.62  1.0000
   1  12   1   31496    2220                                                       27067    6.04   -7.69  1.0000
   1  12   1   30799    1900                                                       26417    6.04   -7.69  1.0000
   1 -12  -1   32799    1950                                                       28417   -5.86    7.62  1.0000
  -1 -12   1   31809    1950                                                       27377    6.02   -7.73  1.0000
  -1  12  -1   30906    2200                                                       26637   -5.87    7.59  1.0000
   2 -12   1   94219    7179                                                      110839   -0.51   18.47  1.0000
   2  12  -1   94883    7649                                                      111599   -0.60   18.61  1.0000
  -2 -12  -1   92778    7379                                                      109359    0.54  -18.60  1.0000
  -2 -12  -1   95610    7159                                                      112449    0.54  -18.60  1.0000
  -2  12   1   87516    7569                                                      103440    0.59  -18.48  1.0000
  -2  12  -1   91490    7579                                                      106519   -0.51  -18.47  1.0000
   2 -12  -1   97707    7179                                                      113179    0.59   18.48  1.0000
  -2 -12   1   98162    7169                                                      113779   -0.60  -18.61  1.0000
   2  12   1   97737    7109                                                      113379    0.54   18.60  1.0000
   2  12   1   98355    7629                                                      114049    0.54   18.60  1.0000
   3 -12   1   24422    1770                                                       22478   -4.74   -2.80  1.0000
  -3  12   1   22873    1930                                                       20958   -4.73   -2.85  1.0000
   3  12  -1   24902    2030                                                       22838    4.67    2.94  1.0000
  -3 -12  -1   26349    1770                                                       24248    4.67    2.92  1.0000
  -3  12  -1   25931    1960                                                       23928   -4.74    2.80  1.0000
   3  12   1   27847    2030                                                       25687    4.67   -2.92  1.0000
   3 -12  -1   28082    1810                                                       25967   -4.73    2.85  1.0000
  -3 -12   1   28907    1770                                                       26687    4.67   -2.94  1.0000
  -4 -12  -1   62651    3620                                                       56654   -0.56  -14.92  1.0000
   4  12  -1   63814    3970                                                       57714    0.50   14.92  1.0000
   4 -12   1   62307    3640                                                       56264    0.54   15.03  1.0000
  -4  12   1   63159    3860                                                       57084   -0.54  -15.03  1.0000
  -4 -12   1   63617    3630                                                       55974    0.50  -14.92  1.0000
   4 -12  -1   58055    3650                                                       50705   -0.54   15.03  1.0000
   4  12   1   57593    3910                                                       50335   -0.56   14.92  1.0000
  -4  12  -1   53450    3810                                                       46365    0.54  -15.03  1.0000
  -5 -12  -1   22065    2130                                                       27877    7.89   -0.76  1.0000
  -5  12   1   22098    2290                                                       27867   -7.83    0.72  1.0000
   5 -12   1   20681    2180                                                       26347   -7.93    0.73  1.0000
   5  12  -1   21133    2450                                                       26787    7.84   -0.76  1.0000
  -5  12  -1   26349    2280                                                       32577   -7.93   -0.73  1.0000
  -5 -12   1   26143    2150                                                       32277    7.84    0.76  1.0000
   5 -12  -1   26801    2230                                                       32997   -7.83   -0.72  1.0000
   5  12   1   25617    2460                                                       31737    7.89    0.76  1.0000
   6 -12   1    1755     480                                                        1050   -1.10    7.44  1.0000
   6  12  -1     790     690                                                         280   -1.09    7.41  1.0000
  -6  12   1     621     460                                                         160    1.09   -7.43  1.0000
  -6 -12  -1     622     420                                                         160    1.06   -7.42  1.0000
  -6  12  -1     464     460                                                         420   -1.10   -7.44  1.0000
   6 -12  -1     919     500                                                        1020    1.09    7.43  1.0000
  -6 -12   1    1290     450                                                        1470   -1.09   -7.41  1.0000
   6  12   1    1077     630                                                        1210    1.06    7.42  1.0000
  -7  12   1    8490     830                                                        7069   -3.31   -1.22  1.0000
   7 -12   1    8558     900                                                        7109   -3.37   -1.23  1.0000
   7  12  -1    9409    1110                                                        7929    3.27    1.17  1.0000
  -7 -12  -1    8466     760                                                        7039    3.34    1.17  1.0000
  -7  12  -1    5726     800                                                        4630   -3.37    1.23  1.0000
   7 -12  -1    6293     840                                                        5159   -3.31    1.22  1.0000
  -7 -12   1    6478     760                                                        5339    3.27   -1.17  1.0000
   7  12   1    6813    1000                                                        5619    3.34   -1.17  1.0000
  -8 -12  -1   11703    1310                                                       16748    1.09   -9.84  1.0000
   8  12  -1   10522    1660                                                       15328   -1.08    9.84  1.0000
  -8  12   1    9413    1430                                                       13959    1.10   -9.81  1.0000
   8  12   1   11712    1650                                                       16728    1.09    9.84  1.0000
  -8  12  -1   10189    1460                                                       14869   -1.09   -9.80  1.0000
  -8 -12   1    9978    1370                                                       14639   -1.08   -9.84  1.0000
  -9 -12  -1   14933    1360                                                       15048   -1.23   -0.68  1.0000
   9  12  -1   15086    1650                                                       15198   -1.22   -0.67  1.0000
  -9  12   1   14479    1460                                                       14599    1.18    0.68  1.0000
   9  12   1   16747    1730                                                       16878   -1.23    0.68  1.0000
  -9 -12   1   13306    1360                                                       13419   -1.22    0.67  1.0000
  -9  12  -1   16011    1490                                                       16148    1.21   -0.69  1.0000
  10  12  -1    3513     900                                                        3460    0.62    1.33  1.0000
 -10  12   1    3048     680                                                        3000   -0.64   -1.33  1.0000
 -10 -12  -1    3178     650                                                        3110   -0.55   -1.33  1.0000
 -10 -12   1     826     600                                                         770    0.62   -1.33  1.0000
 -10  12  -1    1366     660                                                        1290    0.56   -1.32  1.0000
 -11 -12  -1   13357    1470                                                       12779   -1.06   -0.29  1.0000
 -11  12   1   12218    1310                                                       11669    1.05    0.30  1.0000
 -11 -12  -1   12048    1210                                                       11499   -1.06   -0.29  1.0000
 -11  12  -1   13933    1380                                                       13339    1.06   -0.27  1.0000
 -11 -12   1   12827    1270                                                       12269   -1.03    0.30  1.0000
 -12 -12  -1    6303    1170                                                        6049   -1.08    0.69  1.0000
 -12 -12  -1    5742     890                                                        5499   -1.08    0.69  1.0000
 -12  12   1    5847     940                                                        5559   -1.22    0.69  1.0000
 -12  12  -1    5491     920                                                        5149    1.12    0.69  1.0000
 -12 -12   1    5745     920                                                        5379    1.17    0.69  1.0000
 -13 -12  -1    3981    1100                                                        4140   -0.85   -0.02  1.0000
 -13  12  -1    5764     980                                                        5929    0.88   -0.03  1.0000
 -13 -12   1    6355    1010                                                        6529   -0.86    0.02  1.0000
   0 -13  -1    3000     840                                                        9979    0.06   19.43  1.0000
   0  13   1    3094    1200                                                       10149    0.06  -19.43  1.0000
   0 -13  -1    2946     920                                                        9879    0.06   19.43  1.0000
   0  13   1    3001     950                                                        9979    0.06  -19.43  1.0000
   0 -13   1    3094     940                                                       10149   -0.09   19.43  1.0000
   0  13  -1    4121    1260                                                       11949   -0.09  -19.43  1.0000
   1 -13   1     971     440                                                        1440   -9.83   -1.97  1.0000
  -1 -13  -1    1229     430                                                        1820   -9.84   -2.03  1.0000
   1  13  -1    1773     750                                                        2580   -9.84   -2.03  1.0000
  -1  13   1    1714     780                                                        2510   -9.86   -1.99  1.0000
  -1 -13  -1    1446     370                                                        2130   -9.84   -2.03  1.0000
   1  13   1     644     420                                                        1910   -9.84    2.03  1.0000
   1 -13  -1     247     410                                                        1040   -9.86    1.99  1.0000
  -1  13  -1     422     740                                                        1460   -9.83    1.97  1.0000
   1  13   1     235     650                                                        1000   -9.84    2.03  1.0000
  -1 -13   1     368     420                                                        1340   -9.84    2.03  1.0000
   2 -13   1    5898    1190                                                       17458   -2.33   25.18  1.0000
  -2 -13  -1    4682    1140                                                       15248   -2.37   25.15  1.0000
   2  13  -1    5050    1530                                                       15918    2.37  -25.14  1.0000
  -2  13   1    4748    1460                                                       15378    2.32  -25.16  1.0000
  -2 -13  -1    4361    1150                                                       14649   -2.37   25.15  1.0000
  -2  13  -1    2911    1390                                                       11479   -2.33  -25.18  1.0000
  -2 -13   1    2771    1110                                                       11159    2.37   25.14  1.0000
   2  13   1    2774    1390                                                       11169   -2.37  -25.15  1.0000
   2 -13  -1    2402    1140                                                       10369    2.32   25.16  1.0000
   3  13  -1   61316    4830                                                       65983   -3.50    3.81  1.0000
  -3  13   1   60264    4740                                                       65013   -3.60    3.80  1.0000
  -3 -13  -1   62153    4440                                                       66863   -3.51    3.83  1.0000
   3 -13   1   61881    4460                                                       66733   -3.64    3.81  1.0000
  -3 -13  -1   61526    4570                                                       66213   -3.51    3.83  1.0000
  -3 -13   1   64168    4450                                                       69573   -3.50   -3.81  1.0000
   3 -13  -1   64773    4470                                                       70323   -3.60   -3.80  1.0000
   3  13   1   60441    4800                                                       65703   -3.51   -3.83  1.0000
  -3  13  -1   60689    4760                                                       66103   -3.64   -3.81  1.0000
   4 -13   1   49580    3420                                                       51905   -0.57   12.55  1.0000
   4  13  -1   45869    3720                                                       48165    0.67  -12.49  1.0000
  -4  13   1   48557    3650                                                       50975    0.69  -12.53  1.0000
  -4 -13  -1   47897    3370                                                       50155   -0.56   12.50  1.0000
  -4 -13  -1   47509    3490                                                       49755   -0.56   12.50  1.0000
  -4 -13   1   40808    3360                                                       44836    0.67   12.49  1.0000
   4 -13  -1   47822    3440                                                       52275    0.69   12.53  1.0000
   4  13   1   46196    3750                                                       50425   -0.56  -12.50  1.0000
  -4  13  -1   46965    3610                                                       51255   -0.57  -12.55  1.0000
  -5  13   1    8676    1090                                                       10359   -0.39    3.73  1.0000
  -5 -13  -1    9960    1030                                                       11799   -0.58    3.76  1.0000
   5 -13   1    9065    1070                                                       10799   -0.55    3.72  1.0000
   5  13  -1    9375    1300                                                       11139   -0.43    3.75  1.0000
   5 -13  -1    7682    1060                                                        9259   -0.39   -3.73  1.0000
   5  13   1    5625    1130                                                        7019   -0.58   -3.76  1.0000
  -5 -13   1    8032     990                                                        9659   -0.43   -3.75  1.0000
  -5  13  -1    6977    1080                                                        8499   -0.55   -3.72  1.0000
  -6  13   1   10755    1250                                                       11689    0.17    3.62  1.0000
   6 -13   1   11804    1260                                                       12409    0.67   -3.63  1.0000
  -6 -13  -1   12671    1190                                                       13329    0.63   -3.65  1.0000
   6  13  -1   10506    1470                                                       11379    0.03    3.65  1.0000
   6  13   1   12353    1470                                                       12859    0.63    3.65  1.0000
   6 -13  -1   13107    1320                                                       14009    0.17   -3.62  1.0000
  -6  13  -1   12303    1250                                                       12779    0.67    3.63  1.0000
  -6 -13   1   11869    1150                                                       12669    0.03   -3.65  1.0000
   7 -13   1    4529     800                                                        4880    1.86   -0.99  1.0000
   7  13  -1    4124    1000                                                        4410    1.69   -0.99  1.0000
  -7 -13  -1    5052     740                                                        5409    1.82   -1.00  1.0000
  -7  13   1    3421     730                                                        3680    1.67   -0.98  1.0000
   7 -13  -1    4247     830                                                        4720    1.67    0.98  1.0000
  -7  13  -1    3852     780                                                        4360    1.86    0.99  1.0000
  -7 -13   1    4205     720                                                        4680    1.69    0.99  1.0000
   7  13   1    4646     950                                                        5189    1.82    1.00  1.0000
   8  13  -1     854     730                                                         940   -0.37    1.26  1.0000
   8 -13   1    1389     650                                                        1510    0.43   -1.26  1.0000
  -8 -13  -1     663     520                                                         750    0.46   -1.28  1.0000
  -8  13   1    1130     580                                                        1220   -0.31    1.22  1.0000
  -8  13  -1    1741     630                                                        1970    0.43    1.26  1.0000
   8  13   1     852     750                                                        1020    0.46    1.28  1.0000
  -8 -13   1    2373     610                                                        2630   -0.37   -1.26  1.0000
  -9 -13  -1   23735    2140                                                       23548    0.01   -1.56  1.0000
   9  13  -1   27622    2400                                                       27447   -0.02   -1.54  1.0000
  -9  13   1   28860    2170                                                       28647    0.03   -1.53  1.0000
  -9 -13  -1   26684    1980                                                       26487    0.01   -1.56  1.0000
   9  13   1   27190    2370                                                       26777    0.01    1.56  1.0000
  -9 -13   1   25712    2040                                                       25337   -0.02    1.54  1.0000
  -9  13  -1   25340    2100                                                       24928    0.04    1.55  1.0000
 -10  13   1   15172    1540                                                       15528    0.65   -0.21  1.0000
 -10 -13  -1   14712    1430                                                       15068   -0.66    0.20  1.0000
  10  13  -1   13695    1710                                                       14039    0.66   -0.24  1.0000
 -10 -13  -1   13587    1550                                                       13929   -0.66    0.20  1.0000
 -10  13  -1   12902    1440                                                       13269   -0.67   -0.19  1.0000
 -10 -13   1   15764    1390                                                       16168    0.66    0.24  1.0000
 -11 -13  -1    9723    1390                                                       10089    0.77    0.41  1.0000
 -11 -13  -1   12259    1250                                                       12669    0.77    0.41  1.0000
 -11  13   1   11275    1300                                                       11689    0.82    0.43  1.0000
 -11 -13   1   11067    1230                                                       11489    0.78   -0.44  1.0000
 -11  13  -1   10218    1300                                                       10619    0.80   -0.41  1.0000
 -12  13   1    1540     800                                                        2020    0.04    2.57  1.0000
 -12 -13  -1    1795     730                                                        2310   -0.09   -2.55  1.0000
 -12 -13  -1    1117     900                                                        1530   -0.09   -2.55  1.0000
 -12  13  -1    1291     750                                                        1720   -0.06    2.57  1.0000
 -12 -13   1    1556     730                                                        2020    0.08   -2.54  1.0000
 -13 -13  -1    6156    1250                                                        6359    0.55   -0.37  1.0000
 -13 -13   1    7587    1060                                                        7849    0.56    0.36  1.0000
 -13  13  -1    6426    1120                                                        6679    0.59    0.35  1.0000
   0 -14  -1    4128     510                                                        2460    6.38    0.08  1.0000
   0 -14   1    5843     590                                                        3830   -6.38    0.10  1.0000
   0  14  -1    3933     870                                                        2310   -6.38   -0.10  1.0000
   0  14   1    4605     510                                                        2840    6.38   -0.08  1.0000
   0  14   1    4053     800                                                        2410    6.38   -0.08  1.0000
  -1  14   1    8486    1120                                                        7679    3.87    3.36  1.0000
  -1  14   1    8319     860                                                        7519    3.87    3.36  1.0000
   1  14  -1    9219    1210                                                        8369   -3.92   -3.39  1.0000
  -1 -14  -1    8489     810                                                        7649   -3.94   -3.32  1.0000
   1 -14   1    8774     880                                                        7939    3.87    3.29  1.0000
  -1 -14  -1    7871     850                                                        7059   -3.94   -3.32  1.0000
   1 -14  -1   10491     910                                                        9769    3.87   -3.36  1.0000
  -1 -14   1   11378     960                                                       10619   -3.92    3.39  1.0000
  -1  14  -1   13823    1290                                                       12989    3.87   -3.29  1.0000
   1  14   1   11641    1210                                                       10849   -3.94    3.32  1.0000
   1  14   1   11683     900                                                       10889   -3.94    3.32  1.0000
  -2 -14  -1   36767    1880                                                       25257    4.08   13.53  1.0000
  -2  14   1   34851    2150                                                       23708    4.08   13.48  1.0000
   2 -14   1   35017    1890                                                       23838   -4.13  -13.47  1.0000
   2  14  -1   37230    2230                                                       25657   -4.03  -13.52  1.0000
  -2 -14  -1   35547    1870                                                       24248    4.08   13.53  1.0000
   2 -14  -1   39054    1910                                                       27197    4.08  -13.48  1.0000
   2  14   1   37512    2180                                                       25877    4.08  -13.53  1.0000
  -2 -14   1   38443    1890                                                       26667   -4.03   13.52  1.0000
  -2  14  -1   41429    2270                                                       29177   -4.13   13.47  1.0000
  -3  14   1   60316    5039                                                       63064    4.51    1.61  1.0000
   3  14  -1   69407    5179                                                       72493   -4.59   -1.70  1.0000
  -3 -14  -1   67549    4720                                                       70583   -4.61   -1.69  1.0000
   3 -14   1   68693    4760                                                       71633    4.52    1.61  1.0000
  -3 -14  -1   64080    4850                                                       67033   -4.61   -1.69  1.0000
   3 -14  -1   69391    4770                                                       72343    4.51   -1.61  1.0000
  -3 -14   1   73387    4760                                                       76562   -4.59    1.70  1.0000
  -3  14  -1   71874    5089                                                       74883    4.52   -1.61  1.0000
   3  14   1   72144    5129                                                       75282   -4.61    1.69  1.0000
   4 -14   1   33044    2850                                                       42006   -1.86  -10.22  1.0000
  -4  14   1   30924    3030                                                       39636    1.84   10.25  1.0000
  -4 -14  -1   31105    2760                                                       39776    1.90   10.18  1.0000
   4  14  -1   32282    3130                                                       41146   -1.83  -10.22  1.0000
  -4 -14   1   31335    2800                                                       40076   -1.83   10.22  1.0000
   4 -14  -1   30835    2840                                                       39536    1.84  -10.25  1.0000
  -4  14  -1   29870    3000                                                       38416   -1.86   10.22  1.0000
   4  14   1   29710    3080                                                       38196    1.90  -10.18  1.0000
  -5 -14  -1    5593     850                                                        8199   -7.96    0.48  1.0000
  -5 -14  -1    5790     920                                                        8439   -7.96    0.48  1.0000
   5 -14   1    5298     950                                                        7809    7.88   -0.48  1.0000
   5  14  -1    7457    1260                                                       10429   -7.94    0.51  1.0000
  -5  14   1    4783     990                                                        7159    7.84   -0.50  1.0000
   5  14   1    3567    1100                                                        5919   -7.96   -0.48  1.0000
  -5  14  -1    3410     940                                                        5689    7.88    0.48  1.0000
  -5 -14   1    5120     890                                                        7879   -7.94   -0.51  1.0000
   5 -14  -1    4044     900                                                        6489    7.84    0.50  1.0000
   6 -14   1    5864     970                                                        7709    1.17   -4.91  1.0000
  -6 -14  -1    3372     770                                                        4800   -1.14    4.94  1.0000
  -6  14   1    3708     920                                                        5219   -1.17    4.99  1.0000
  -6 -14  -1    4097     850                                                        5659   -1.14    4.94  1.0000
   6  14  -1    4147    1060                                                        5739    1.16   -5.00  1.0000
   6  14   1    4970    1060                                                        6719   -1.14   -4.94  1.0000
  -6 -14   1    6133     850                                                        8089    1.16    5.00  1.0000
  -6  14  -1    5836     950                                                        7719    1.17    4.91  1.0000
   6 -14  -1    4660     910                                                        6379   -1.17   -4.99  1.0000
   7  14  -1     673     820                                                         780   -1.86   -0.99  1.0000
  -7  14   1    1109     680                                                        1260    1.91    1.05  1.0000
  -7 -14  -1     227     510                                                         280   -1.88   -0.97  1.0000
   7 -14   1     580     590                                                         680    1.93    1.01  1.0000
  -7 -14  -1     796     610                                                         910   -1.88   -0.97  1.0000
  -7 -14   1    2385     580                                                        2600   -1.86    0.99  1.0000
   7  14   1    1725     800                                                        1900   -1.88    0.97  1.0000
   7 -14  -1    2812     760                                                        3060    1.91   -1.05  1.0000
  -7  14  -1    2706     740                                                        2940    1.93   -1.01  1.0000
   8  14  -1   12975    1330                                                        9209    1.38   -7.95  1.0000
  -8 -14  -1   15094    1080                                                       11019   -1.37    7.93  1.0000
   8 -14   1   15076    1220                                                       11009    1.38   -7.91  1.0000
  -8 -14  -1   12073    1110                                                        8459   -1.37    7.93  1.0000
  -8  14   1   12660    1120                                                        8939   -1.40    7.94  1.0000
  -8  14  -1   12765    1100                                                        9019    1.38    7.91  1.0000
  -8 -14   1   11767     990                                                        8169    1.38    7.95  1.0000
   8  14   1   11996    1270                                                        8369   -1.37   -7.93  1.0000
  -9 -14  -1   10992    1310                                                       11339    2.00   -0.12  1.0000
  -9  14   1    9984    1250                                                       10319   -1.97    0.14  1.0000
   9  14  -1   12628    1570                                                       13019    2.00   -0.15  1.0000
  -9 -14  -1   11798    1180                                                       12159    2.00   -0.12  1.0000
   9  14   1   10471    1460                                                       10789    2.00    0.12  1.0000
  -9 -14   1   10681    1170                                                       11019    2.00    0.15  1.0000
  -9  14  -1   10126    1240                                                       10429   -1.97   -0.11  1.0000
 -10 -14  -1   14164    1720                                                       14639    0.16    0.84  1.0000
 -10 -14  -1   17609    1590                                                       18138    0.16    0.84  1.0000
  10  14  -1   17649    2010                                                       18168   -0.14   -0.83  1.0000
 -10  14   1   16028    1700                                                       16538    0.13    0.86  1.0000
 -10 -14   1   15758    1600                                                       16248   -0.14    0.83  1.0000
 -10  14  -1   19276    1690                                                       19848   -0.15    0.87  1.0000
  10  14   1   18673    2020                                                       19218    0.16   -0.84  1.0000
 -11 -14  -1    1560     830                                                        1430    0.27   -0.75  1.0000
 -11  14   1    1502     780                                                        1380   -0.25    0.72  1.0000
 -11 -14  -1    1622     670                                                        1490    0.27   -0.75  1.0000
 -11  14  -1    1378     790                                                        1250   -0.26   -0.76  1.0000
 -11 -14   1    1922     680                                                        1780    0.26    0.70  1.0000
 -12 -14  -1    1747     980                                                        1690    0.48   -0.89  1.0000
 -12 -14  -1    1137     710                                                        1090    0.48   -0.89  1.0000
 -12  14   1     964     810                                                         910    0.56   -0.89  1.0000
 -12  14  -1    1256     810                                                        1180   -0.50   -0.89  1.0000
 -12 -14   1    1074     730                                                        1000   -0.52   -0.89  1.0000
   0  15  -1   24528    1880                                                       17238    0.01   10.95  1.0000
   0  15   1   28527    1560                                                       20608    0.00   10.96  1.0000
   0 -15  -1   27147    1550                                                       19438    0.00  -10.96  1.0000
   0  15   1   29831    1900                                                       21718    0.00   10.96  1.0000
   0 -15   1   27884    1560                                                       20068    0.01  -10.95  1.0000
   1  15  -1    3401     960                                                        3550    4.34    2.43  1.0000
  -1  15   1    2845     600                                                        2960    4.43    2.42  1.0000
  -1  15   1    4501     930                                                        4680    4.43    2.42  1.0000
  -1 -15  -1    3525     600                                                        3680    4.33    2.43  1.0000
   1 -15   1    3726     630                                                        3880    4.43    2.43  1.0000
   1  15   1    3639     900                                                        3770    4.33   -2.43  1.0000
  -1  15  -1    3658     920                                                        3780    4.43   -2.43  1.0000
  -1 -15   1    1970     580                                                        2030    4.34   -2.43  1.0000
   1 -15  -1    2889     610                                                        2980    4.43   -2.42  1.0000
  -2 -15  -1    4605    1030                                                       10509    2.95  -15.93  1.0000
  -2  15   1    4714    1310                                                       10679   -2.95   15.93  1.0000
  -2 -15  -1    4166     950                                                        9829    2.95  -15.93  1.0000
   2 -15   1    4670    1060                                                       10629    2.97  -15.96  1.0000
   2  15  -1    4541    1360                                                       10399   -2.94   15.90  1.0000
  -2 -15   1    5021    1040                                                       11329   -2.94  -15.90  1.0000
   2  15   1    5338    1380                                                       11819    2.95   15.93  1.0000
   2 -15  -1    5077    1090                                                       11429   -2.95  -15.93  1.0000
  -2  15  -1    3981    1290                                                        9749    2.97   15.96  1.0000
  -3 -15  -1   15192    1200                                                       13329    3.43   -0.70  1.0000
   3 -15   1   15947    1240                                                       14039    3.43   -0.73  1.0000
  -3 -15  -1   15214    1190                                                       13349    3.43   -0.70  1.0000
   3  15  -1   14926    1540                                                       13079    3.43   -0.71  1.0000
  -3  15   1   16145    1500                                                       14219    3.44   -0.75  1.0000
   3 -15  -1   13579    1210                                                       11749    3.44    0.75  1.0000
  -3 -15   1   15930    1260                                                       13949    3.43    0.71  1.0000
   3  15   1   18219    1550                                                       16098    3.43    0.70  1.0000
  -3  15  -1   16293    1510                                                       14289    3.43    0.73  1.0000
  -4 -15  -1    8977    1060                                                        9189    3.52   -7.84  1.0000
   4  15  -1   13333    1530                                                       13659   -3.55    7.80  1.0000
   4 -15   1   10957    1190                                                       11239    3.52   -7.86  1.0000
  -4  15   1   10421    1370                                                       10659   -3.57    7.82  1.0000
   4 -15  -1   13531    1180                                                       13109   -3.57   -7.82  1.0000
  -4 -15   1   13094    1120                                                       12679   -3.55   -7.80  1.0000
   4  15   1   11626    1420                                                       11229    3.52    7.84  1.0000
  -4  15  -1   13021    1350                                                       12629    3.52    7.86  1.0000
  -5 -15  -1    7217     900                                                        7429    0.19   -0.52  1.0000
  -5  15   1    8543    1200                                                        8769    0.17   -0.51  1.0000
   5 -15   1    9109    1100                                                        9339    0.22   -0.50  1.0000
  -5 -15  -1    8933    1010                                                        9169    0.19   -0.52  1.0000
   5  15  -1    8742    1320                                                        8979    0.15   -0.53  1.0000
  -5 -15   1    7668     940                                                        7889    0.15    0.53  1.0000
   5  15   1   10188    1310                                                       10439    0.19    0.52  1.0000
   5 -15  -1   10281    1110                                                       10529    0.17    0.51  1.0000
  -5  15  -1    9159    1140                                                        9389    0.22    0.50  1.0000
   6  15  -1   12157    1520                                                       12699   -2.78   -2.70  1.0000
  -6 -15  -1   13960    1190                                                       14619    2.45    2.68  1.0000
  -6  15   1   12974    1400                                                       13499   -2.86   -2.66  1.0000
   6 -15   1   12484    1370                                                       13109    2.40    2.67  1.0000
  -6 -15  -1   10981    1260                                                       11559    2.45    2.68  1.0000
  -6 -15   1    9851    1150                                                       10399   -2.78    2.70  1.0000
   6  15   1   12304    1530                                                       12989    2.45   -2.68  1.0000
   6 -15  -1   10416    1300                                                       10949   -2.86    2.66  1.0000
  -6  15  -1   10961    1350                                                       11609    2.40   -2.67  1.0000
   7 -15   1    3107     840                                                        3680   -2.91    1.45  1.0000
   7  15  -1    2825     960                                                        3360   -2.91    1.42  1.0000
  -7 -15  -1    2899     680                                                        3450   -2.95    1.44  1.0000
  -7  15   1    2758     800                                                        3280   -2.84    1.41  1.0000
  -7 -15  -1    2545     710                                                        3060   -2.95    1.44  1.0000
   7  15   1    1791     910                                                        2240   -2.95   -1.44  1.0000
   7 -15  -1    2052     750                                                        2520   -2.84   -1.41  1.0000
  -7 -15   1    2253     650                                                        2750   -2.91   -1.42  1.0000
  -7  15  -1    1613     730                                                        2040   -2.91   -1.45  1.0000
  -8 -15  -1    1489     610                                                        1330    0.44    0.91  1.0000
   8 -15   1    1541     730                                                        1380    0.46    0.91  1.0000
  -8  15   1     929     740                                                         810   -0.52   -0.87  1.0000
  -8 -15  -1     412     680                                                         330    0.44    0.91  1.0000
   8  15  -1    1291     850                                                        1150   -0.49   -0.87  1.0000
  -8  15  -1     763     720                                                         650    0.46   -0.91  1.0000
   8 -15  -1    1733     730                                                        1570   -0.52    0.87  1.0000
   8  15   1    1224     820                                                        1080    0.44   -0.91  1.0000
  -8 -15   1    1218     600                                                        1080   -0.49    0.87  1.0000
  -9  15   1    1736     820                                                        1820   -0.35    1.07  1.0000
  -9 -15  -1    2957     730                                                        3070   -0.35    1.13  1.0000
  -9 -15  -1    1754     780                                                        1840   -0.35    1.13  1.0000
   9  15  -1    1766     970                                                        1850   -0.34    1.09  1.0000
  -9 -15   1    2812     730                                                        2990   -0.34   -1.09  1.0000
  -9  15  -1    2615     800                                                        2790   -0.35   -1.10  1.0000
   9  15   1    2545     970                                                        2720   -0.35   -1.13  1.0000
  10  15  -1    5717    1290                                                        5589   -0.71    0.39  1.0000
 -10  15   1    5878     980                                                        5749   -0.68    0.35  1.0000
 -10 -15  -1    6381    1070                                                        6239    0.70   -0.35  1.0000
 -10 -15  -1    4520     870                                                        4400    0.70   -0.35  1.0000
  10  15   1    6204    1240                                                        6029    0.70    0.35  1.0000
 -10 -15   1    6392     910                                                        6219   -0.71   -0.39  1.0000
 -10  15  -1    6707    1070                                                        6529    0.68    0.32  1.0000
 -11  15   1     973     820                                                        1040    0.02   -0.76  1.0000
 -11 -15  -1    1597     700                                                        1670   -0.03   -0.71  1.0000
 -11 -15  -1    1012     870                                                        1070   -0.03   -0.71  1.0000
 -11  15  -1       3     780                                                        -140    0.00    0.75  1.0000
 -11 -15   1     588     710                                                         650    0.00    0.73  1.0000
 -12 -15  -1    4914     960                                                        5219    0.35    1.13  1.0000
 -12 -15  -1    5311    1210                                                        5629    0.35    1.13  1.0000
 -12  15   1    4458    1050                                                        4760   -0.30   -1.15  1.0000
 -12 -15   1    4249     920                                                        4540   -0.33    1.13  1.0000
 -12  15  -1    4820    1090                                                        5139    0.33   -1.16  1.0000
   0  16   1    5854    1250                                                        8829   -7.56    0.02  1.0000
   0 -16  -1    5528     950                                                        8429   -7.56   -0.02  1.0000
   0  16  -1    7267    1380                                                       10549    7.56    0.03  1.0000
   0 -16   1    6304    1010                                                        9379    7.56   -0.03  1.0000
   1 -16   1    7430     930                                                        8119   -1.68   -0.11  1.0000
  -1 -16  -1    8152     920                                                        8859    1.65    0.10  1.0000
   1  16  -1    5523    1220                                                        6109    1.65    0.14  1.0000
  -1  16   1    9070     950                                                        9829   -1.68   -0.16  1.0000
  -1  16   1    8907    1290                                                        9659   -1.68   -0.16  1.0000
  -1  16  -1    7043    1220                                                        7709   -1.68    0.11  1.0000
   1 -16  -1    7996     940                                                        8699   -1.68    0.16  1.0000
   1  16   1    7361    1250                                                        8029    1.65   -0.10  1.0000
  -1 -16   1    7018     930                                                        7669    1.65   -0.14  1.0000
  -2  16   1     516     160                                                         280   -5.32   -8.08  1.0000
  -2  16   1     665     830                                                         530   -5.32   -8.08  1.0000
  -2 -16  -1     665     470                                                         530   -5.31   -8.03  1.0000
   2 -16   1     697     510                                                         580    5.31    8.08  1.0000
   2  16  -1     664     850                                                         530    5.29    8.04  1.0000
   2 -16  -1    1870     610                                                        2370   -5.32    8.08  1.0000
   2  16   1    2171     870                                                        2740   -5.31    8.03  1.0000
  -2  16  -1    1017     830                                                        1240    5.31   -8.08  1.0000
  -2 -16   1     839     490                                                         980    5.29   -8.04  1.0000
   3 -16   1    1067     520                                                        1060   -2.21    1.15  1.0000
   3  16  -1     101     820                                                          70    2.29   -1.11  1.0000
  -3 -16  -1    2907     540                                                        2900    2.31   -1.11  1.0000
  -3 -16  -1    1783     550                                                        1770    2.31   -1.11  1.0000
  -3  16   1    1848     820                                                        1850   -2.19    1.15  1.0000
   3 -16  -1    1113     540                                                        1100   -2.19   -1.15  1.0000
   3  16   1    2489     860                                                        2470    2.31    1.11  1.0000
  -3  16  -1    2234     910                                                        2230   -2.21   -1.15  1.0000
  -3 -16   1    2010     600                                                        1990    2.29    1.11  1.0000
  -4 -16  -1     393     470                                                          80   -2.26   -4.11  1.0000
  -4 -16  -1    1000     450                                                         430   -2.26   -4.11  1.0000
   4  16  -1    1019     750                                                         440    2.22    4.16  1.0000
  -4  16   1     372     810                                                          70   -2.24   -4.14  1.0000
   4 -16   1     118     470                                                        -590    2.25    4.10  1.0000
  -4  16  -1    1411     840                                                         820    2.25   -4.10  1.0000
   4  16   1    1703     740                                                        1050   -2.26    4.11  1.0000
  -4 -16   1     120     450                                                         -70    2.22   -4.16  1.0000
   4 -16  -1     956     520                                                         480   -2.24    4.14  1.0000
  -5 -16  -1   10701    1010                                                        8449    5.53   -1.05  1.0000
   5  16  -1   13297    1390                                                       10769    5.55   -1.09  1.0000
  -5  16   1   11179    1240                                                        8909   -5.45    1.08  1.0000
   5 -16   1   11874    1140                                                        9549   -5.41    1.07  1.0000
  -5 -16  -1   10374     970                                                        8159    5.53   -1.05  1.0000
  -5  16  -1   11741    1220                                                        9239   -5.41   -1.07  1.0000
   5 -16  -1   12672    1130                                                       10049   -5.45   -1.08  1.0000
  -5 -16   1   11086     980                                                        8599    5.55    1.09  1.0000
   5  16   1   12081    1300                                                        9489    5.53    1.05  1.0000
  -6  16   1    5723    1060                                                        5289    1.53   -1.86  1.0000
   6 -16   1    6700     970                                                        6229   -1.52    1.78  1.0000
   6  16  -1    4685    1050                                                        4290   -1.53    1.85  1.0000
  -6 -16  -1    4250     810                                                        3870    1.53   -1.79  1.0000
  -6 -16  -1    6600     820                                                        6129    1.53   -1.79  1.0000
  -6 -16   1    5326     770                                                        4750   -1.53   -1.85  1.0000
   6  16   1    6347    1130                                                        5719    1.53    1.79  1.0000
   6 -16  -1    5569     940                                                        4980    1.53    1.86  1.0000
  -6  16  -1    4069     970                                                        3570   -1.52   -1.78  1.0000
  -7  16   1    2309     830                                                        2450   -0.42   -1.45  1.0000
  -7 -16  -1    2570     720                                                        2710    0.39    1.42  1.0000
   7 -16   1    2237     800                                                        2370   -0.40   -1.43  1.0000
   7  16  -1    4113    1070                                                        4300    0.41    1.43  1.0000
  -7 -16  -1    2861     680                                                        3010    0.39    1.42  1.0000
  -7 -16   1    3010     690                                                        3050    0.41   -1.43  1.0000
   7 -16  -1    2276     840                                                        2310   -0.42    1.45  1.0000
   7  16   1    3900    1000                                                        3940    0.39   -1.42  1.0000
  -7  16  -1    2340     890                                                        2370   -0.40    1.43  1.0000
   8  16  -1     587     860                                                         130   -1.17    5.41  1.0000
  -8  16   1     568     790                                                         120    1.20   -5.43  1.0000
  -8 -16  -1     517     580                                                         100    1.14   -5.38  1.0000
  -8 -16  -1     163     610                                                        -480    1.14   -5.38  1.0000
   8 -16   1    1983     810                                                        1010   -1.18    5.38  1.0000
  -8  16  -1     659     710                                                         170   -1.18   -5.38  1.0000
   8  16   1     163     860                                                        -170    1.14    5.38  1.0000
   8 -16  -1    1198     690                                                         480    1.20    5.43  1.0000
  -8 -16   1     165     590                                                        -250   -1.17   -5.41  1.0000
   9  16  -1       6     920                                                       -1220   -0.88    0.52  1.0000
  -9 -16  -1     333     580                                                         360   -0.86    0.52  1.0000
  -9 -16  -1       5     710                                                        -630   -0.86    0.52  1.0000
  -9  16   1       6     790                                                        -480    0.88   -0.51  1.0000
   9  16   1       5     910                                                        -420   -0.86   -0.52  1.0000
  -9  16  -1       5     760                                                        -370    0.85    0.51  1.0000
  -9 -16   1      44     630                                                          50   -0.88   -0.52  1.0000
  10  16  -1       0    1020                                                        -210    0.06    0.17  1.0000
 -10 -16  -1      46     640                                                          50   -0.17   -0.18  1.0000
 -10 -16  -1       0     810                                                         -50   -0.17   -0.18  1.0000
 -10  16   1     939     840                                                         940   -0.04   -0.22  1.0000
  10  16   1     700    1020                                                         720   -0.17    0.18  1.0000
 -10 -16   1     982     660                                                         990    0.06   -0.17  1.0000
 -10  16  -1    1208     860                                                        1230    0.14   -0.23  1.0000
 -11 -16  -1     745     850                                                         720    0.24    0.86  1.0000
  11  16  -1       4    1050                                                        -480    0.25    0.83  1.0000
 -11 -16  -1    1595     740                                                        1560    0.24    0.86  1.0000
 -11  16   1    1106     890                                                        1070   -0.28   -0.84  1.0000
 -11 -16   1     893     750                                                         910    0.25   -0.83  1.0000
 -11  16  -1    2113     910                                                        2140   -0.27    0.85  1.0000
   0 -17  -1     910     530                                                        1280    0.03    2.45  1.0000
   0  17  -1     893     850                                                        1260   -0.01   -2.45  1.0000
   0  17   1     792     820                                                        1140    0.03   -2.45  1.0000
   0 -17   1     442     510                                                         710   -0.01    2.45  1.0000
  -1  17   1    2002     600                                                        1620   -0.89   -2.03  1.0000
  -1 -17  -1    2288     590                                                        1870   -0.82   -2.06  1.0000
   1  17  -1    2033     870                                                        1640   -0.83   -2.06  1.0000
  -1  17   1    4006     930                                                        3460   -0.89   -2.03  1.0000
   1 -17   1    2432     590                                                        2010   -0.90   -2.03  1.0000
   1  17   1    3231     880                                                        2730   -0.82    2.06  1.0000
  -1 -17   1    2707     610                                                        2250   -0.83    2.06  1.0000
  -1  17  -1    2729     910                                                        2280   -0.90    2.03  1.0000
   1 -17  -1    1759     570                                                        1400   -0.89    2.03  1.0000
  -2  17   1     186     370                                                         660    2.18   -7.17  1.0000
  -2 -17  -1      77     460                                                         180   -2.15    7.15  1.0000
   2  17  -1      80     770                                                         310    2.13   -7.14  1.0000
   2 -17   1     162     510                                                         600   -2.18    7.17  1.0000
  -2  17   1     303     830                                                        -130    2.18   -7.17  1.0000
   2  17   1     301     740                                                        -440   -2.15   -7.15  1.0000
  -2  17  -1     303     840                                                        -420   -2.18   -7.17  1.0000
  -2 -17   1     121     520                                                          70    2.13    7.14  1.0000
   2 -17  -1     303     490                                                        -530    2.18    7.17  1.0000
  -3 -17  -1     627     540                                                         510   -1.59   -0.50  1.0000
   3  17  -1    1040     880                                                         890   -1.59   -0.50  1.0000
   3 -17   1     685     520                                                         560   -1.57   -0.43  1.0000
  -3  17   1      71     550                                                          30   -1.60   -0.44  1.0000
  -3  17   1     621     860                                                         500   -1.60   -0.44  1.0000
   3  17   1     753     730                                                         660   -1.59    0.50  1.0000
   3 -17  -1     328     500                                                         260   -1.60    0.44  1.0000
  -3 -17   1     466     500                                                         390   -1.59    0.50  1.0000
  -3  17  -1      14     780                                                        -470   -1.57    0.43  1.0000
   4 -17   1     972     610                                                         530   -3.59    2.82  1.0000
   4  17  -1     111     760                                                        -400    3.58   -2.78  1.0000
  -4  17   1     112     830                                                        -920    3.57   -2.81  1.0000
  -4 -17  -1    1607     580                                                        1030   -3.62    2.80  1.0000
  -4  17  -1     112     870                                                        -420   -3.59   -2.82  1.0000
   4 -17  -1    1238     580                                                         680    3.57    2.81  1.0000
   4  17   1    1204     810                                                         650   -3.62   -2.80  1.0000
  -4 -17   1     505     550                                                         170    3.58    2.78  1.0000
  -5 -17  -1     508     330                                                         590   -0.65   -0.98  1.0000
   5 -17   1    1401     730                                                        1530   -0.66   -0.94  1.0000
  -5 -17  -1    1128     570                                                        1250   -0.65   -0.98  1.0000
  -5  17   1     350     920                                                         410   -0.68   -0.91  1.0000
   5  17  -1    1831     910                                                        1980   -0.68   -0.95  1.0000
  -5  17  -1       7     850                                                        -520   -0.66    0.94  1.0000
   5 -17  -1    1304     710                                                        1420   -0.68    0.91  1.0000
  -5 -17   1     644     560                                                         730   -0.68    0.95  1.0000
   5  17   1       7     730                                                        -190   -0.65    0.98  1.0000
  -6  17   1    3133     940                                                        2550    3.19    2.26  1.0000
   6 -17   1    2383     780                                                        1870   -3.09   -2.26  1.0000
  -6 -17  -1    2610     660                                                        2070   -3.12   -2.28  1.0000
  -6 -17  -1    1779     660                                                        1330   -3.12   -2.28  1.0000
   6  17  -1    1687     930                                                        1250    3.19    2.28  1.0000
  -6 -17   1    2938     690                                                        2370    3.19   -2.28  1.0000
   6 -17  -1    2590     770                                                        2060    3.19   -2.26  1.0000
  -6  17  -1    1830     840                                                        1380   -3.09    2.26  1.0000
   6  17   1    2240     900                                                        1740   -3.12    2.28  1.0000
  -7  17   1    1184     840                                                         880    1.67   -1.32  1.0000
   7 -17   1    1379     790                                                        1050    1.64   -1.36  1.0000
  -7 -17  -1    1454     630                                                        1110    1.68   -1.36  1.0000
  -7 -17  -1     907     600                                                         640    1.68   -1.36  1.0000
   7  17  -1    1874     990                                                        1480    1.70   -1.32  1.0000
   7  17   1    2043     910                                                        1620    1.68    1.36  1.0000
  -7  17  -1      25     810                                                        -500    1.64    1.36  1.0000
  -7 -17   1    1738     650                                                        1350    1.70    1.32  1.0000
   7 -17  -1    2691     860                                                        2210    1.67    1.32  1.0000
  -8 -17  -1     509     640                                                         470   -0.70   -1.05  1.0000
   8 -17   1    2767     940                                                        2680   -0.73   -1.05  1.0000
   8  17  -1    1933    1010                                                        1860    0.73    1.05  1.0000
  -8 -17  -1       9     710                                                        -140   -0.70   -1.05  1.0000
  -8  17   1      70     870                                                          50    0.74    1.04  1.0000
   8 -17  -1    1504     830                                                        1470    0.74   -1.04  1.0000
  -8 -17   1     825     640                                                         800    0.73   -1.05  1.0000
   8  17   1    1658     930                                                        1630   -0.70    1.05  1.0000
  -8  17  -1    1299     830                                                        1270   -0.73    1.05  1.0000
  -9 -17  -1       5     710                                                         -20    0.74   -0.65  1.0000
  -9  17   1       5     870                                                        -450    0.72   -0.63  1.0000
   9  17  -1    1037    1020                                                        1080    0.73   -0.64  1.0000
  -9 -17  -1    1291     690                                                        1340    0.74   -0.65  1.0000
   9  17   1     722     930                                                         780    0.74    0.65  1.0000
  -9 -17   1    1603     670                                                        1690    0.73    0.64  1.0000
  -9  17  -1     351     890                                                         390    0.73    0.65  1.0000
  10  17  -1     409     990                                                         420    0.18   -0.18  1.0000
 -10  17   1       0     870                                                       -1000    0.16   -0.18  1.0000
 -10 -17  -1       0     750                                                         -20   -0.18    0.19  1.0000
 -10 -17  -1     261     680                                                         270   -0.18    0.19  1.0000
 -10 -17   1     433     660                                                         440    0.18    0.18  1.0000
  10  17   1     482    1000                                                         490   -0.18   -0.19  1.0000
 -10  17  -1       0     860                                                         -50   -0.15   -0.17  1.0000
   0  18   1    3380     910                                                        1840    6.57    0.03  1.0000
   0 -18  -1    3092     580                                                        1630    6.57   -0.03  1.0000
   0 -18   1    2298     600                                                        1070   -6.56   -0.02  1.0000
   0  18  -1    2298     950                                                        1070   -6.56    0.02  1.0000
  -1  18   1    3339    1090                                                        3880    0.86   -1.74  1.0000
   1  18  -1    4402    1080                                                        5019   -0.86    1.74  1.0000
   1 -18   1    2240     700                                                        2690    0.87   -1.75  1.0000
  -1 -18  -1    3804     720                                                        4380   -0.86    1.74  1.0000
   1 -18  -1    4000     730                                                        4590    0.86    1.74  1.0000
   1  18   1    3034     970                                                        3550   -0.86   -1.74  1.0000
  -1  18  -1    3150    1030                                                        3680    0.87    1.75  1.0000
  -1 -18   1    3674     780                                                        4240   -0.86   -1.74  1.0000
   2  18  -1    1632     910                                                         760   -4.13   -4.97  1.0000
  -2  18   1     227     580                                                        -260    4.14    4.98  1.0000
  -2  18   1     625     910                                                         130    4.14    4.98  1.0000
  -2 -18  -1    1701     570                                                         810    4.11    4.96  1.0000
   2 -18   1    1579     550                                                         720   -4.11   -4.99  1.0000
   2 -18  -1    1162     530                                                         440    4.14   -4.98  1.0000
   2  18   1    2609     890                                                        1480    4.11   -4.96  1.0000
  -2  18  -1     226     890                                                         -70   -4.11    4.99  1.0000
  -2 -18   1    1663     550                                                         780   -4.13    4.97  1.0000
  -3 -18  -1    2589     710                                                        3060    0.21    2.78  1.0000
   3 -18   1    2541     710                                                        3010   -0.24   -2.76  1.0000
   3  18  -1    1289     990                                                        1620    0.22    2.78  1.0000
  -3  18   1     612     980                                                         840   -0.25   -2.74  1.0000
  -3  18   1    2014     710                                                        2430   -0.25   -2.74  1.0000
  -3 -18   1    2763     690                                                        3220    0.22   -2.78  1.0000
   3  18   1    1703     930                                                        2060    0.21   -2.78  1.0000
  -3  18  -1    3352    1040                                                        3860   -0.24    2.76  1.0000
   3 -18  -1    2101     730                                                        2500   -0.25    2.74  1.0000
  -4  18   1     913     670                                                         810    1.86   -0.25  1.0000
  -4 -18  -1      18     540                                                           0    1.83   -0.26  1.0000
   4 -18   1     540     600                                                         460   -1.85    0.28  1.0000
   4  18  -1      19     820                                                        -350   -1.84    0.24  1.0000
  -4  18   1     137     940                                                          90    1.86   -0.25  1.0000
  -4 -18   1      19     520                                                        -410   -1.84   -0.24  1.0000
  -4  18  -1      19     920                                                        -920   -1.85   -0.28  1.0000
   4  18   1    1097     880                                                         940    1.83    0.26  1.0000
   4 -18  -1     511     640                                                         400    1.86    0.25  1.0000
   5  18  -1    1871     990                                                        1780   -1.95    1.13  1.0000
  -5  18   1      27     950                                                        -720    1.97   -1.06  1.0000
  -5 -18  -1     164     570                                                         120   -1.95    1.13  1.0000
   5 -18   1      27     690                                                         -90    1.94   -1.08  1.0000
  -5 -18   1    1620     600                                                        1460   -1.95   -1.13  1.0000
   5 -18  -1     720     720                                                         600    1.97    1.06  1.0000
  -5  18  -1     222     900                                                         150    1.94    1.08  1.0000
   5  18   1      27     760                                                        -440   -1.95   -1.13  1.0000
   6 -18   1     442     710                                                         600    1.27    0.86  1.0000
  -6  18   1     512     990                                                         680   -1.28   -0.82  1.0000
   6  18  -1    1281    1040                                                        1540    1.27    0.84  1.0000
  -6 -18  -1    1052     660                                                        1290   -1.27   -0.86  1.0000
  -6 -18  -1     917     630                                                        1140   -1.27   -0.86  1.0000
   6  18   1     345     900                                                         490   -1.27    0.86  1.0000
  -6 -18   1      12     550                                                         -80    1.27   -0.84  1.0000
   6 -18  -1     995     790                                                        1230   -1.28    0.82  1.0000
  -6  18  -1      13     940                                                        -260    1.27   -0.86  1.0000
  -7  18   1      10    1000                                                         -90   -0.47    1.30  1.0000
  -7 -18  -1    1483     690                                                        1600    0.49   -1.31  1.0000
  -7 -18  -1     551     630                                                         620    0.49   -1.31  1.0000
   7  18  -1      10     930                                                        -210    0.49   -1.29  1.0000
   7 -18   1     347     770                                                         400   -0.48    1.33  1.0000
  -7  18  -1      11     830                                                        -430   -0.48   -1.33  1.0000
   7  18   1    1314    1020                                                        1410    0.49    1.31  1.0000
  -7 -18   1     788     630                                                         860    0.49    1.29  1.0000
   7 -18  -1      10     730                                                        -190   -0.47   -1.30  1.0000
  -8 -18  -1     458     620                                                         320   -0.66    2.73  1.0000
   8 -18   1    1473     910                                                        1250    0.69   -2.69  1.0000
  -8  18   1      43     950                                                         -10   -0.71    2.72  1.0000
   8  18  -1     837    1040                                                         660    0.69   -2.75  1.0000
  -8 -18  -1     389     720                                                         260   -0.66    2.73  1.0000
  -8  18  -1      42     790                                                       -1350    0.69    2.69  1.0000
  -8 -18   1     436     670                                                         330    0.69    2.75  1.0000
   8 -18  -1      43     790                                                        -530   -0.71   -2.72  1.0000
   8  18   1    1838    1060                                                        1650   -0.66   -2.73  1.0000
  -8 -18   1     909     760                                                         770    0.69    2.75  1.0000
  -9 -18  -1    1127     680                                                        1150   -0.51   -0.39  1.0000
  -9  18   1     536    1000                                                         550    0.48    0.36  1.0000
  -9 -18  -1    1533     860                                                        1560   -0.51   -0.39  1.0000
   9 -18   1    1382     990                                                        1410    0.51    0.40  1.0000
   9  18  -1    1139    1080                                                        1160   -0.49   -0.36  1.0000
  -9  18  -1    2087    1050                                                        2120    0.51   -0.40  1.0000
  -9 -18   1    1675     850                                                        1700   -0.49    0.36  1.0000
   9  18   1     831    1040                                                         850   -0.51    0.39  1.0000
  -9 -18   1     586     670                                                         600   -0.49    0.36  1.0000
   0 -19  -1      24     530                                                         -30   -0.02    2.11  1.0000
   0  19   1     277     840                                                         140   -0.02   -2.11  1.0000
   0  19  -1    1426     940                                                        1090    0.02   -2.11  1.0000
   0 -19   1      24     530                                                        -480    0.02    2.11  1.0000
   1  19  -1    4924    1220                                                        4970   -0.61    1.40  1.0000
  -1 -19  -1    5205     830                                                        5249   -0.63    1.41  1.0000
  -1  19   1    2973    1020                                                        3000   -0.61    1.35  1.0000
   1 -19   1    4187     800                                                        4220   -0.62    1.36  1.0000
   1 -19  -1    5669     840                                                        5629   -0.61   -1.35  1.0000
  -1  19  -1    3716    1090                                                        3680   -0.62   -1.36  1.0000
   1  19   1    4405    1140                                                        4370   -0.63   -1.41  1.0000
  -1 -19   1    5222     810                                                        5189   -0.61   -1.40  1.0000
  -2  19   1    3555    1150                                                        3900   -1.65    1.99  1.0000
   2  19  -1    4519    1160                                                        4900   -1.63    2.03  1.0000
  -2 -19  -1    4665     810                                                        5059    1.65   -2.03  1.0000
   2 -19   1    4119     870                                                        4490    1.65   -2.00  1.0000
   2 -19  -1    4761     840                                                        5319   -1.65   -1.99  1.0000
  -2  19  -1    3672    1160                                                        4160    1.65    2.00  1.0000
  -2 -19   1    5564     860                                                        6159   -1.63   -2.03  1.0000
   2  19   1    4658    1110                                                        5209    1.65    2.03  1.0000
  -3  19   1     595     970                                                         630   -0.34    0.22  1.0000
   3  19  -1    2682    1010                                                        2770   -0.37    0.28  1.0000
   3 -19   1    1900     710                                                        1960   -0.34    0.22  1.0000
  -3  19   1    2430     760                                                        2500   -0.34    0.22  1.0000
  -3 -19  -1    3130     740                                                        3220   -0.37    0.26  1.0000
  -3 -19   1    2813     700                                                        2900   -0.37   -0.28  1.0000
   3 -19  -1    4330     840                                                        4420   -0.34   -0.22  1.0000
  -3  19  -1    2316    1110                                                        2380   -0.34   -0.22  1.0000
   3  19   1    3804    1080                                                        3900   -0.37   -0.26  1.0000
  -4 -19  -1     445     620                                                         610    1.80   -0.15  1.0000
  -4  19   1      17     930                                                         -30   -1.76    0.18  1.0000
  -4  19   1     816     730                                                        1030   -1.76    0.18  1.0000
   4 -19   1    1102     700                                                        1350    1.77   -0.18  1.0000
   4  19  -1     750     910                                                         960   -1.79    0.16  1.0000
  -4  19  -1    1691    1080                                                        1980    1.77    0.18  1.0000
   4 -19  -1     255     650                                                         370   -1.76   -0.18  1.0000
  -4 -19   1     310     600                                                         440   -1.79   -0.16  1.0000
   4  19   1     821     830                                                        1030    1.80    0.15  1.0000
   5 -19   1    1197     750                                                        1380    0.97    0.58  1.0000
  -5  19   1     847     760                                                        1000    0.98    0.56  1.0000
  -5  19   1     958    1090                                                        1120    0.98    0.56  1.0000
  -5 -19  -1     514     660                                                         640    0.99    0.62  1.0000
   5  19  -1     676     920                                                         820    1.01    0.61  1.0000
  -5  19  -1       8     940                                                          30    0.97   -0.58  1.0000
   5 -19  -1     478     710                                                         600    0.98   -0.56  1.0000
  -5 -19   1    1000     630                                                        1180    1.01   -0.61  1.0000
   5  19   1     936     890                                                        1110    0.99   -0.62  1.0000
   6 -19   1    3242     980                                                        3750    1.41    1.20  1.0000
  -6 -19  -1    3541     790                                                        4080    1.44    1.22  1.0000
  -6  19   1     993    1130                                                        1280   -1.39   -1.20  1.0000
   6  19  -1    3005    1130                                                        3500   -1.43   -1.21  1.0000
  -6  19   1    3153     930                                                        3650   -1.39   -1.20  1.0000
  -6 -19   1    2300     750                                                        2730   -1.43    1.21  1.0000
   6  19   1    1940    1080                                                        2340    1.44   -1.22  1.0000
   6 -19  -1    4233    1030                                                        4800   -1.39    1.20  1.0000
  -6  19  -1    3303    1130                                                        3810    1.41   -1.20  1.0000
  -7 -19  -1    6054     960                                                        6359   -0.14    0.91  1.0000
  -7  19   1    4092    1210                                                        4330   -0.17    0.87  1.0000
   7  19  -1    4485    1320                                                        4740   -0.15    0.89  1.0000
  -7  19   1    5631    1050                                                        5909   -0.17    0.87  1.0000
   7 -19   1    4181    1100                                                        4430   -0.14    0.89  1.0000
  -7 -19   1    3277     820                                                        3490   -0.15   -0.89  1.0000
  -7  19  -1    4187    1240                                                        4430   -0.14   -0.89  1.0000
   7  19   1    4861    1210                                                        5129   -0.14   -0.91  1.0000
   7 -19  -1    5676    1180                                                        5949   -0.17   -0.87  1.0000
  -8 -19  -1    2801     780                                                        2980    0.61    0.38  1.0000
   8 -19   1    3351    1060                                                        3550    0.62    0.38  1.0000
   8  19  -1    2943    1300                                                        3130   -0.61   -0.41  1.0000
  -8 -19  -1    3393     940                                                        3590    0.61    0.38  1.0000
  -8  19   1    3844    1000                                                        4060   -0.62   -0.41  1.0000
  -8  19   1    3883    1240                                                        4100   -0.62   -0.41  1.0000
  -8 -19   1    3227     820                                                        3410   -0.61    0.41  1.0000
   8  19   1    1284    1060                                                        1400    0.61   -0.38  1.0000
  -8  19  -1    2400    1140                                                        2560    0.62   -0.38  1.0000
   8 -19  -1    2622    1070                                                        2790   -0.62    0.41  1.0000
  -8 -19   1    2479     930                                                        2640   -0.61    0.41  1.0000
   0  20  -1   19607    2300                                                       22048    3.66   -0.05  1.0000
   0  20   1   17964    2230                                                       20308   -3.66   -0.06  1.0000
   0 -20  -1   19581    1800                                                       22018   -3.66    0.06  1.0000
   0 -20   1   19696    1860                                                       22148    3.66    0.05  1.0000
  -1  20   1    2659    1130                                                        2390   -0.35    1.92  1.0000
  -1 -20  -1    3554     750                                                        3250    0.36   -1.90  1.0000
   1  20  -1    4205    1200                                                        3870    0.36   -1.92  1.0000
   1 -20   1    3170     750                                                        2880   -0.36    1.91  1.0000
   1  20   1    2920    1060                                                        2700    0.36    1.90  1.0000
  -1 -20   1    3783     750                                                        3530    0.36    1.92  1.0000
   1 -20  -1    3671     760                                                        3420   -0.35   -1.92  1.0000
  -1  20  -1    5254    1230                                                        4960   -0.36   -1.91  1.0000
   2  20  -1    7166    1410                                                        8519    1.81    2.75  1.0000
   2 -20   1    6390    1060                                                        7649    1.76    2.72  1.0000
  -2 -20  -1    5709    1000                                                        6919   -1.77   -2.76  1.0000
  -2  20   1    7156    1450                                                        8489   -1.78   -2.71  1.0000
  -2 -20   1    7075    1050                                                        8419    1.81   -2.75  1.0000
  -2  20  -1    7942    1440                                                        9339    1.76   -2.72  1.0000
   2 -20  -1    8391    1150                                                        9829   -1.78    2.71  1.0000
   2  20   1    7584    1420                                                        8969   -1.77    2.76  1.0000
   3  20  -1    3960    1080                                                        3420   -1.41   -2.40  1.0000
  -3  20   1    4509    1130                                                        3940    1.39    2.34  1.0000
  -3 -20  -1    5347     830                                                        4720   -1.41   -2.40  1.0000
   3 -20   1    5827     930                                                        5179    1.39    2.34  1.0000
  -3  20  -1    2138    1080                                                        1790    1.39   -2.34  1.0000
   3 -20  -1    2484     790                                                        2110    1.39   -2.34  1.0000
  -3 -20   1    3154     720                                                        2730   -1.41    2.40  1.0000
   3  20   1    2358    1020                                                        1990   -1.41    2.40  1.0000
  -4  20   1    4165     960                                                        4800   -1.04    1.87  1.0000
  -4  20   1    5296    1330                                                        6009   -1.04    1.87  1.0000
   4 -20   1    3952     930                                                        4570    1.03   -1.87  1.0000
  -4 -20  -1    3808     850                                                        4420   -1.04    1.88  1.0000
   4  20  -1    4023    1170                                                        4650    1.04   -1.87  1.0000
  -4  20  -1    4607    1290                                                        5279    1.03    1.87  1.0000
   4 -20  -1    1444     810                                                        1830   -1.04   -1.87  1.0000
  -4 -20   1    3767     880                                                        4380    1.04    1.87  1.0000
   4  20   1    2414    1040                                                        2910   -1.04   -1.88  1.0000
  -5  20   1    2469     870                                                        2390   -0.47    0.19  1.0000
   5 -20   1       1     740                                                        -150   -0.48    0.21  1.0000
   5  20  -1    1970    1110                                                        1890    0.39   -0.27  1.0000
  -5 -20  -1    1040     660                                                         980    0.42   -0.27  1.0000
  -5  20   1     816    1100                                                         770   -0.47    0.19  1.0000
   5 -20  -1    1293     770                                                        1240   -0.47   -0.19  1.0000
   5  20   1    1437    1030                                                        1370    0.42    0.27  1.0000
  -5 -20   1    1404     690                                                        1340    0.39    0.27  1.0000
  -5  20  -1     577    1010                                                         540   -0.48   -0.21  1.0000
  -6  20   1    6807    1480                                                        6489    0.64    1.41  1.0000
  -6  20   1   10422    1300                                                       10029    0.64    1.41  1.0000
   6  20  -1    9136    1510                                                        8779   -0.61   -1.44  1.0000
   6 -20   1    9049    1330                                                        8689   -0.62   -1.41  1.0000
  -6 -20  -1    8874    1100                                                        8529    0.59    1.44  1.0000
  -6 -20   1    8343    1100                                                        8109   -0.61    1.44  1.0000
   6 -20  -1    9137    1270                                                        8879    0.64   -1.41  1.0000
  -6  20  -1    7406    1500                                                        7179   -0.62    1.41  1.0000
   6  20   1    8883    1440                                                        8649    0.59   -1.44  1.0000
   7  20  -1    7970    1530                                                        7879   -0.48    0.83  1.0000
   7 -20   1    7506    1320                                                        7449    0.42   -0.90  1.0000
  -7  20   1    6107    1360                                                        6049    0.42   -0.86  1.0000
  -7 -20  -1    7679    1080                                                        7599   -0.46    0.84  1.0000
  -7  20   1    7152    1170                                                        7089    0.42   -0.86  1.0000
  -7  20  -1    6137    1360                                                        6029    0.42    0.90  1.0000
   7 -20  -1    6191    1260                                                        6079    0.42    0.86  1.0000
  -7 -20   1    6010    1030                                                        5879   -0.48   -0.83  1.0000
   7  20   1    5074    1310                                                        4960   -0.46   -0.84  1.0000
   0  21   1    3839    1150                                                        3190    0.00    2.44  1.0000
   0 -21  -1    3156     770                                                        2570    0.00   -2.44  1.0000
   0 -21   1    1999     710                                                        1540   -0.03   -2.44  1.0000
   0  21  -1    3276    1110                                                        2680   -0.03    2.44  1.0000
   1  21  -1    8817    1480                                                        8669    1.51   -0.34  1.0000
  -1  21   1    6045    1380                                                        5929    1.51   -0.32  1.0000
   1 -21   1    8667    1110                                                        8529    1.53   -0.33  1.0000
  -1 -21  -1    8127    1080                                                        7989    1.53   -0.33  1.0000
   1  21   1    7905    1360                                                        7769    1.53    0.33  1.0000
  -1 -21   1    7536    1040                                                        7399    1.51    0.34  1.0000
   1 -21  -1    7718    1090                                                        7589    1.51    0.32  1.0000
  -1  21  -1    7861    1470                                                        7729    1.53    0.33  1.0000
   2 -21   1     690     690                                                         600   -1.01    0.47  1.0000
  -2 -21  -1    1088     660                                                         970   -1.02    0.50  1.0000
   2  21  -1     458    1040                                                         380    1.03   -0.51  1.0000
  -2  21   1    1070    1010                                                         960    1.00   -0.46  1.0000
  -2  21  -1     525    1010                                                         450   -1.01   -0.47  1.0000
   2  21   1    1072     930                                                         960   -1.02   -0.50  1.0000
   2 -21  -1     609     670                                                         530    1.00    0.46  1.0000
  -2 -21   1     454     620                                                         380    1.03    0.51  1.0000
   3 -21   1     936     720                                                         900    1.14    0.37  1.0000
  -3  21   1    1098    1120                                                        1060    1.14    0.37  1.0000
  -3 -21  -1    1650     710                                                        1600    1.16    0.35  1.0000
   3  21  -1    2677    1160                                                        2610    1.16    0.33  1.0000
  -3  21  -1    1391    1160                                                        1360    1.14   -0.37  1.0000
   3 -21  -1    2430     780                                                        2390    1.14   -0.37  1.0000
   3  21   1    2133    1000                                                        2090    1.16   -0.35  1.0000
  -3 -21   1    1673     690                                                        1630    1.16   -0.33  1.0000
  -4  21   1       1     980                                                        -800    0.48    0.06  1.0000
   4 -21   1     356     780                                                         360   -0.46   -0.05  1.0000
   4  21  -1    1518    1060                                                        1530    0.51    0.06  1.0000
  -4 -21  -1    1854     700                                                        1870   -0.50   -0.07  1.0000
   4  21   1    1824     980                                                        1840   -0.50    0.07  1.0000
   4 -21  -1    1638     810                                                        1650    0.48   -0.06  1.0000
  -4 -21   1     345     650                                                         350    0.51   -0.06  1.0000
  -4  21  -1    1620    1110                                                        1630   -0.46    0.05  1.0000
  -5 -21  -1       2     690                                                        -230   -0.44   -0.43  1.0000
   5 -21   1     298     840                                                         250   -0.43   -0.46  1.0000
   5  21  -1       2     960                                                        -270   -0.44   -0.46  1.0000
  -5  21   1     557     850                                                         490   -0.42   -0.47  1.0000
  -5  21   1       2    1020                                                        -300   -0.42   -0.47  1.0000
   5  21   1     912     950                                                         830   -0.44    0.43  1.0000
  -5  21  -1     415    1070                                                         360   -0.43    0.46  1.0000
  -5 -21   1     871     680                                                         790   -0.44    0.46  1.0000
   5 -21  -1       2     730                                                        -870   -0.42    0.47  1.0000
   6 -21   1    6278    1250                                                        6169   -0.06   -0.30  1.0000
  -6  21   1    7925    1230                                                        7799    0.04    0.31  1.0000
  -6 -21  -1    6703    1060                                                        6589   -0.08   -0.31  1.0000
   6  21  -1    6687    1470                                                        6569    0.07    0.32  1.0000
  -6  21   1    7673    1510                                                        7549    0.04    0.31  1.0000
   6  21   1    6593    1340                                                        6479   -0.08    0.31  1.0000
   6 -21  -1    6997    1210                                                        6879    0.04   -0.31  1.0000
  -6 -21   1    8159    1060                                                        8029    0.07   -0.32  1.0000
  -6  21  -1    2418    1380                                                        2350   -0.06    0.30  1.0000
   0 -22  -1    6241    1000                                                        6079    0.46   -0.02  1.0000
   0  22   1    5575    1290                                                        5419    0.46    0.02  1.0000
   0  22  -1    6754    1450                                                        6579   -0.47    0.02  1.0000
   0 -22   1    6969    1060                                                        6789   -0.47   -0.02  1.0000
  -1 -22  -1   10272    1200                                                       10099   -0.02    0.95  1.0000
  -1  22   1    9550    1540                                                        9389    0.00   -0.96  1.0000
   1 -22   1    8910    1240                                                        8749    0.02   -0.95  1.0000
   1  22  -1   11016    1590                                                       10839   -0.01    0.95  1.0000
  -1 -22   1   11457    1240                                                       11209   -0.01   -0.95  1.0000
  -1  22  -1    9910    1570                                                        9679    0.02    0.95  1.0000
   1  22   1    8109    1450                                                        7899   -0.02   -0.95  1.0000
   1 -22  -1   11958    1300                                                       11709    0.00    0.96  1.0000
  -2  22   1     686    1050                                                         810    0.18    1.12  1.0000
   2 -22   1    1583     770                                                        1770   -0.18   -1.13  1.0000
   2  22  -1    1425    1140                                                        1610   -0.21   -1.18  1.0000
  -2 -22  -1    2104     790                                                        2330    0.20    1.19  1.0000
  -2 -22   1     792     680                                                         930   -0.21    1.18  1.0000
   2 -22  -1    2354     780                                                        2580    0.18   -1.12  1.0000
  -2  22  -1     604    1160                                                         720   -0.18    1.13  1.0000
   2  22   1    1735    1080                                                        1940    0.20   -1.19  1.0000
  -3  22   1    1624    1240                                                        1890   -0.98   -1.28  1.0000
  -3 -22  -1    1534     770                                                        1790    0.97    1.27  1.0000
   3 -22   1     659     810                                                         830   -0.97   -1.27  1.0000
   3  22  -1     864    1020                                                        1060    0.97    1.30  1.0000
   3 -22  -1    1074     790                                                        1290   -0.98    1.28  1.0000
   3  22   1    1889    1040                                                        2170    0.97   -1.27  1.0000
  -3 -22   1    2092     760                                                        2390    0.97   -1.30  1.0000
  -3  22  -1    1176    1120                                                        1400   -0.97    1.27  1.0000
  -4  22   1      13    1070                                                       -1830    0.46   -1.47  1.0000
   4 -22   1     133     830                                                         220   -0.47    1.48  1.0000
  -4 -22  -1      65     650                                                         130    0.48   -1.50  1.0000
   4  22  -1     212    1030                                                         320   -0.47    1.49  1.0000
  -4 -22   1     905     750                                                        1120   -0.47   -1.49  1.0000
   4 -22  -1      13     760                                                        -100    0.46    1.47  1.0000
  -4  22  -1      13    1150                                                        -270   -0.47   -1.48  1.0000
   4  22   1     549     970                                                         720    0.48    1.50  1.0000
   0   0   2   48934     370                                                        4700  124.71    0.19  1.0000
   0   0  -2   45970     380                                                        5679  124.71   -0.19  1.0000
  -1   0  -2   11975    3410                                                       50865   54.06    0.10  1.0000
   1   0   2   12729    3300                                                       52465   54.06   -0.10  1.0000
  -1   0   2   12415    3310                                                       51835  -54.10    0.11  1.0000
   1   0  -2   12548    3410                                                       52135  -54.10   -0.11  1.0000
   2   0  -2  147950    6049                                                       92301   34.82   -0.05  1.0000
  -2   0   2  145003    5839                                                       89971   34.82    0.05  1.0000
  -2   0  -2  147180    6039                                                       91681   34.83   -0.06  1.0000
   2   0   2  149695    5839                                                       93661   34.83    0.06  1.0000
  -3   0  -2  576081   41166                                                      624228   13.38    0.02  1.0000
  -3   0   2  587634   39736                                                      636426  -13.43    0.02  1.0000
  -4   0  -2   37144    1680                                                       24148   16.13   -0.06  1.0000
  -5   0  -2  135708    8469                                                      128147    4.49    0.07  1.0000
  -6   0  -2    3610     640                                                        6949   10.05   -0.02  1.0000
  -7   0  -2  325959   21888                                                      333387    2.79    0.07  1.0000
  -8   0  -2    4510     540                                                        3710    2.69    0.03  1.0000
  -9   0  -2   16220    1360                                                       15938   -0.48   -0.02  1.0000
 -10   0  -2    1508     470                                                        1970   -2.40   -0.02  1.0000
 -10   0  -2    2504     610                                                        3090   -2.40   -0.02  1.0000
 -11   0  -2   24391    2050                                                       27157   -3.74    0.00  1.0000
 -11   0  -2   26316    2210                                                       29187   -3.74    0.00  1.0000
 -12   0  -2    2568     700                                                        2520   -0.21    0.00  1.0000
 -12   0   2    3299     690                                                        3240   -0.23    0.00  1.0000
 -13   0  -2   42005    3100                                                       42896    0.94   -0.02  1.0000
 -13   0   2   38431    2980                                                       39276   -0.93   -0.02  1.0000
 -14   0   2     132     640                                                         470    4.54    0.01  1.0000
 -14   0  -2     363     710                                                         860    4.55    0.05  1.0000
 -15   0  -2    1889     930                                                        2590    3.22   -0.01  1.0000
   0  -1   2 1042564   61114                                                      926887    0.07   25.13  1.0000
   0   1  -2 1097666   63264                                                      978882    0.07  -25.13  1.0000
   0   1   2 1074855   61114                                                      957464   -0.03   25.10  1.0000
   0   1   2 1119790   63864                                                      999900   -0.03   25.10  1.0000
   0  -1  -2 1085470   60984                                                      967483   -0.03  -25.10  1.0000
   0  -1  -2 1101354   63254                                                      982482   -0.03  -25.10  1.0000
  -1   1   2   24878    3310                                                       51235  -29.68   -1.51  1.0000
  -1  -1  -2   23650    3410                                                       49475  -29.69   -1.44  1.0000
   1   1  -2   23841    3410                                                       49705   29.64    1.43  1.0000
   1  -1   2   22492    3290                                                       47805   29.70    1.53  1.0000
   1   1  -2   24785    3440                                                       51065   29.64    1.43  1.0000
  -1  -1  -2   22261    3260                                                       47455  -29.69   -1.44  1.0000
  -1  -1   2   30840    3300                                                       58804   29.64   -1.43  1.0000
  -1  -1   2   30386    3300                                                       58174   29.64   -1.43  1.0000
  -2   1   2  197860   10949                                                      163774  -10.53   15.82  1.0000
   2  -1   2  202736   10499                                                      168223  -10.54   15.82  1.0000
  -2  -1  -2  207548   10879                                                      172453   10.61  -15.89  1.0000
  -2   1   2  206185   10509                                                      171363  -10.53   15.82  1.0000
  -2  -1  -2  201702   10449                                                      167123   10.61  -15.89  1.0000
   2   1  -2  200561   10959                                                      166043   10.60  -15.92  1.0000
  -2   1  -2  193591   10859                                                      159774  -10.54  -15.82  1.0000
  -2  -1   2  192165   10489                                                      158284   10.60   15.92  1.0000
  -3  -1  -2  294361   16888                                                      271953  -17.75   -0.61  1.0000
  -3  -1  -2  290126   16238                                                      267873  -17.75   -0.61  1.0000
  -3  -1   2  267299   16278                                                      244486   17.73   -0.60  1.0000
  -3   1  -2  269838   16868                                                      247095   17.65   -0.57  1.0000
  -4  -1  -2   71249    5879                                                       90811   16.46   -1.81  1.0000
  -4  -1  -2   77861    5629                                                       98270   16.46   -1.81  1.0000
  -4   1  -2   64588    5849                                                       83052  -16.43   -1.79  1.0000
  -4  -1   2   63987    5639                                                       82402   16.47    1.82  1.0000
  -5  -1  -2  100236    6679                                                      109599   -6.58   -0.41  1.0000
  -5   1  -2   91801    6939                                                      100480    6.52   -0.40  1.0000
  -6  -1  -2  114688    6799                                                      108369    8.23   -1.00  1.0000
  -6   1  -2  110720    7069                                                      104680   -8.22   -0.95  1.0000
  -7  -1  -2   36350    2340                                                       32497    8.48   -0.10  1.0000
  -7   1  -2   42361    2480                                                       38326   -8.46   -0.21  1.0000
  -8  -1  -2   49613    3140                                                       47475   -3.22    0.01  1.0000
  -8   1  -2   49145    3270                                                       47095    3.23    0.01  1.0000
  -9  -1  -2   11985     980                                                       10999   -2.36   -0.82  1.0000
  -9  -1  -2   12819     910                                                       11799   -2.36   -0.82  1.0000
  -9   1  -2    7581     860                                                        6689    2.33   -0.79  1.0000
 -10  -1  -2   38295    2780                                                       35346    4.19    1.33  1.0000
 -10  -1  -2   38773    2600                                                       35806    4.19    1.33  1.0000
 -10   1  -2   44055    2760                                                       40856   -4.18    1.30  1.0000
 -10  -1   2   42966    2690                                                       39766    4.21   -1.33  1.0000
 -11  -1  -2   22134    1750                                                       22408   -0.32    0.38  1.0000
 -11  -1  -2   20435    1890                                                       20698   -0.32    0.38  1.0000
 -11   1  -2   25202    1870                                                       25467    0.31    0.35  1.0000
 -11  -1   2   24960    1870                                                       25257    0.32    0.39  1.0000
 -12  -1  -2   14396    1600                                                       14899    1.22    0.84  1.0000
 -12  -1   2   17666    1560                                                       18218    1.24   -0.84  1.0000
 -12   1  -2   18672    1610                                                       19278   -1.20    0.90  1.0000
 -13   1   2    3579     760                                                        3420    0.89    0.31  1.0000
 -13  -1  -2    2040     780                                                        1920    0.89    0.33  1.0000
 -13   1  -2    3627     750                                                        3490   -0.88    0.29  1.0000
 -13  -1   2    2936     760                                                        2810   -0.90    0.29  1.0000
 -14  -1  -2    4270     980                                                        4100   -1.58   -0.39  1.0000
 -14   1   2    5817     910                                                        5629    1.59    0.42  1.0000
 -14   1  -2    3905     870                                                        3770    1.61   -0.42  1.0000
 -14  -1   2    5550     920                                                        5389   -1.58    0.40  1.0000
 -15  -1  -2   11472    1490                                                       11639    0.34   -0.02  1.0000
   0   2   2   52913     180                                                         420 -105.32   -0.14  1.0000
   0  -2   2   49352     130                                                        1010 -105.33   -0.11  1.0000
   0  -2  -2   50278     110                                                         740 -105.32    0.14  1.0000
   0   2   2   49343     200                                                        1030 -105.32   -0.14  1.0000
   0   2  -2   49772     110                                                         840 -105.33    0.11  1.0000
   0  -2   2   49543     130                                                         970 -105.33   -0.11  1.0000
   0   2  -2   48083     150                                                        1180 -105.33    0.11  1.0000
   1  -2   2   63589    1860                                                       26207  -46.10   11.25  1.0000
  -1  -2  -2   64396    1920                                                       26867  -46.05   11.11  1.0000
  -1  -2  -2   62459    1840                                                       25557  -46.05   11.11  1.0000
  -1   2   2   66168    1880                                                       27917   46.11  -11.30  1.0000
   1   2  -2   65159    1930                                                       27357   46.05  -11.15  1.0000
  -1   2   2   64372    1940                                                       26697   46.11  -11.30  1.0000
   1  -2   2   60204    1840                                                       23938  -46.10   11.25  1.0000
   1  -2  -2   69682    1870                                                       31707   46.11   11.30  1.0000
  -1   2  -2   70534    1950                                                       32357  -46.10  -11.25  1.0000
  -1  -2   2   66838    1850                                                       29827   46.05   11.15  1.0000
  -1  -2   2   68308    1870                                                       30867   46.05   11.15  1.0000
   1   2   2   68378    1970                                                       30947  -46.05  -11.11  1.0000
  -1   2  -2   71752    1910                                                       33227  -46.10  -11.25  1.0000
   1  -2  -2   69316    1920                                                       31447   46.11   11.30  1.0000
   2  -2   2   65285    4440                                                       86551  -27.92  -10.54  1.0000
   2   2  -2   55771    4670                                                       75312  -27.88  -10.44  1.0000
  -2   2  -2   50008    4600                                                       66823  -27.92   10.54  1.0000
   2   2   2   49895    4450                                                       66743  -27.90   10.43  1.0000
  -2   2  -2   50721    4670                                                       67673  -27.92   10.54  1.0000
   2  -2  -2   48974    4600                                                       65563  -27.89   10.54  1.0000
  -2  -2   2   50530    4470                                                       67483  -27.88   10.44  1.0000
   2   2   2   51557    4690                                                       68723  -27.90   10.43  1.0000
  -2  -2   2   48837    4440                                                       65463  -27.88   10.44  1.0000
   3   2  -2  190507   13589                                                      182022   11.07   -4.95  1.0000
  -3   2   2  215129   13569                                                      206099   11.13   -4.98  1.0000
  -3  -2  -2  216966   12959                                                      207959  -11.04    4.94  1.0000
  -3  -2  -2  212307   13479                                                      203390  -11.04    4.94  1.0000
  -3  -2   2  224285   12989                                                      215098   11.07    4.95  1.0000
  -3   2  -2  222988   13449                                                      213789  -11.12   -4.97  1.0000
  -3  -2   2  218770   12999                                                      209689   11.07    4.95  1.0000
   3   2   2  215081   12979                                                      206079  -11.04   -4.94  1.0000
  -4  -2  -2  141831    8569                                                      142616  -15.66   -9.93  1.0000
  -4  -2  -2  142049    8929                                                      142836  -15.66   -9.93  1.0000
  -4   2  -2  130639    8889                                                      131407  -15.66    9.94  1.0000
  -4  -2   2  130226    8579                                                      130947  -15.66    9.91  1.0000
  -4  -2   2  128434    8609                                                      129137  -15.66    9.91  1.0000
  -5  -2  -2   14115     790                                                       13169   -4.31    4.34  1.0000
  -5  -2   2   11369     840                                                       10809    4.32    4.36  1.0000
  -5  -2   2   10027     760                                                        9489    4.32    4.36  1.0000
  -5   2  -2    9528     800                                                        8989   -4.32   -4.38  1.0000
  -6  -2  -2   10755    1040                                                       16198   -8.87   -5.69  1.0000
  -6   2  -2    8850    1070                                                       13739   -8.82    5.67  1.0000
  -6  -2   2    9402    1080                                                       14459   -8.87    5.71  1.0000
  -6  -2   2    8108    1020                                                       12839   -8.87    5.71  1.0000
  -7  -2  -2   15899    1230                                                       14509   -2.18    2.70  1.0000
  -7   2  -2   20714    1320                                                       18788   -2.18   -2.78  1.0000
  -7  -2   2   22046    1350                                                       20088    2.16    2.69  1.0000
  -8  -2  -2   75384    4530                                                       67053   -1.10   -6.79  1.0000
  -8   2  -2   79924    4720                                                       71403   -1.13    6.73  1.0000
  -8  -2   2   79598    4610                                                       71053   -1.12    6.77  1.0000
  -9  -2  -2   10734     910                                                       10309    0.13    1.36  1.0000
  -9   2  -2   12113    1000                                                       11629    0.11   -1.33  1.0000
  -9  -2   2    9711     990                                                        9269   -0.12    1.36  1.0000
 -10  -2  -2    8886     910                                                        9059    2.43   -0.97  1.0000
 -10  -2  -2    8500    1040                                                        8669    2.43   -0.97  1.0000
 -10  -2   2    9731     930                                                        9929    2.44    0.97  1.0000
 -10  -2   2    9474    1010                                                        9669    2.44    0.97  1.0000
 -10   2  -2   11382    1030                                                       11609    2.36    0.98  1.0000
 -11  -2  -2     452     580                                                         300    2.95   -0.49  1.0000
 -11  -2  -2     475     440                                                         320    2.95   -0.49  1.0000
 -11   2  -2    2167     560                                                        1890    2.92    0.49  1.0000
 -11  -2   2    2892     610                                                        2570   -2.94   -0.51  1.0000
 -12  -2  -2     456     600                                                         600    0.04    1.67  1.0000
 -12  -2   2     826     560                                                        1010    0.04   -1.66  1.0000
 -12   2  -2     297     500                                                         410    0.00   -1.64  1.0000
 -13  -2  -2    8587    1200                                                        8619   -0.58    0.86  1.0000
 -13   2  -2   10375    1170                                                       10339   -0.56   -0.84  1.0000
 -13  -2   2   10407    1180                                                       10379    0.54    0.84  1.0000
 -14  -2  -2   16773    1720                                                       17738   -3.57    1.03  1.0000
 -14  -2   2   15762    1630                                                       16708   -3.56   -1.05  1.0000
 -15  -2  -2    2823     900                                                        2240   -3.12    0.91  1.0000
   0  -3  -2   52934     690                                                        9859   -0.09   56.29  1.0000
   0   3  -2   54891     750                                                       10709   -0.11   56.30  1.0000
   0   3   2   48472     710                                                        7989   -0.09  -56.29  1.0000
   0  -3   2   54982     690                                                       10749   -0.11  -56.30  1.0000
   0  -3   2   54664     700                                                       10609   -0.11  -56.30  1.0000
   0   3  -2   54800     710                                                       10669   -0.11   56.30  1.0000
   0   3   2   54016     760                                                       10329   -0.09  -56.29  1.0000
  -1  -3  -2   25602    1070                                                       16068   15.78    3.20  1.0000
  -1  -3  -2   25965    1120                                                       16358   15.78    3.20  1.0000
  -1   3   2   24824    1110                                                       15418   15.82    3.16  1.0000
   1   3  -2   25601    1180                                                       16048  -15.81   -3.18  1.0000
  -1   3   2   24660    1140                                                       15288   15.82    3.16  1.0000
  -1   3  -2   24867    1140                                                       16458  -15.78    3.18  1.0000
  -1   3  -2   25097    1090                                                       16648  -15.78    3.18  1.0000
  -1  -3   2   25710    1090                                                       17138  -15.81    3.18  1.0000
   1  -3  -2   24476    1100                                                       16108   15.82   -3.16  1.0000
   1  -3  -2   25350    1090                                                       16828   15.82   -3.16  1.0000
   1   3   2   25285    1090                                                       16808   15.78   -3.20  1.0000
  -1  -3   2   24072    1060                                                       15788  -15.81    3.18  1.0000
   1   3   2   25249    1160                                                       16778   15.78   -3.20  1.0000
  -2  -3  -2   24455    3390                                                       53255   -2.71   39.68  1.0000
  -2   3   2   25495    3400                                                       54615    2.47  -39.57  1.0000
   2  -3   2   19743    3240                                                       45635    2.50  -39.56  1.0000
  -2  -3  -2   25570    3240                                                       54965   -2.71   39.68  1.0000
   2   3   2   22622    3440                                                       50005   -2.71  -39.68  1.0000
   2  -3  -2   23387    3270                                                       50965    2.47   39.57  1.0000
  -2  -3   2   21788    3230                                                       48715   -2.70  -39.70  1.0000
   2  -3  -2   23252    3350                                                       50755    2.47   39.57  1.0000
   2   3   2   22532    3240                                                       49865   -2.71  -39.68  1.0000
  -2   3  -2   22157    3340                                                       49055    2.50   39.56  1.0000
  -2  -3   2   23093    3270                                                       50755   -2.70  -39.70  1.0000
  -2   3  -2   23546    3420                                                       51215    2.50   39.56  1.0000
  -3   3   2   62300    4560                                                       76112   13.36    1.52  1.0000
  -3  -3  -2   58773    4550                                                       72443   13.63    1.49  1.0000
  -3  -3  -2   61111    4350                                                       75042   13.63    1.49  1.0000
   3  -3   2   59056    4360                                                       72523  -13.39   -1.50  1.0000
   3   3   2   51184    4610                                                       64934   13.63   -1.49  1.0000
  -3  -3   2   48899    4340                                                       62354  -13.63    1.50  1.0000
  -3   3  -2   53212    4580                                                       66973  -13.39    1.50  1.0000
   3   3   2   49997    4340                                                       63594   13.63   -1.49  1.0000
  -3  -3   2   50394    4380                                                       64044  -13.63    1.50  1.0000
  -3   3  -2   51594    4490                                                       65153  -13.39    1.50  1.0000
  -4  -3  -2   17729    1100                                                       13959  -14.85    8.96  1.0000
  -4   3   2   17996    1150                                                       14249   14.80   -9.02  1.0000
  -4   3  -2   20375    1130                                                       16898   14.83    8.99  1.0000
  -4   3  -2   21208    1200                                                       17688   14.83    8.99  1.0000
  -4  -3   2   20468    1160                                                       16978  -14.83   -8.98  1.0000
  -4  -3   2   20816    1100                                                       17308  -14.83   -8.98  1.0000
   4   3   2   20200    1090                                                       16708  -14.85   -8.96  1.0000
  -5  -3  -2   17805    1160                                                       15498    3.46    1.98  1.0000
  -5   3   2   19015    1210                                                       16678    3.37    1.98  1.0000
  -5  -3   2   19492    1210                                                       17208   -3.42    1.99  1.0000
  -5   3  -2   18467    1190                                                       16258   -3.39    1.99  1.0000
  -5  -3   2   19992    1140                                                       17678   -3.42    1.99  1.0000
  -6   3   2    4438     690                                                        8449   11.75   -2.21  1.0000
  -6  -3  -2    3710     620                                                        7419  -11.73    2.11  1.0000
  -6  -3   2    3783     710                                                        7619  -11.73   -2.10  1.0000
  -6  -3   2    2927     620                                                        6369  -11.73   -2.10  1.0000
  -6   3  -2    3937     650                                                        7829   11.72    2.20  1.0000
  -7  -3  -2   26815    2190                                                       31597   -8.20    0.36  1.0000
  -7   3   2   27917    2290                                                       32817   -8.17    0.44  1.0000
  -7  -3   2   27806    2160                                                       32287    8.21    0.34  1.0000
  -7   3  -2   27215    2250                                                       31687    8.14    0.47  1.0000
  -7  -3   2   29538    2260                                                       34157    8.21    0.34  1.0000
  -8  -3  -2    1042     340                                                        1150    3.89   -1.88  1.0000
  -8  -3   2    1162     320                                                        1370    3.89    1.88  1.0000
  -8  -3   2    1135     430                                                        1340    3.89    1.88  1.0000
  -8   3  -2    1236     370                                                        1460   -3.93   -1.88  1.0000
  -9  -3  -2   34739    2540                                                       39256    4.90    1.39  1.0000
  -9   3  -2   31704    2610                                                       36006   -4.85    1.41  1.0000
  -9  -3   2   30602    2580                                                       34897   -4.92    1.43  1.0000
  -9  -3   2   32635    2500                                                       37066   -4.92    1.43  1.0000
 -10  -3  -2    4956     830                                                        5329   -2.62   -2.70  1.0000
 -10  -3  -2    5627     690                                                        6029   -2.62   -2.70  1.0000
 -10   3  -2    5672     730                                                        5979    2.58   -2.67  1.0000
 -10  -3   2    5187     770                                                        5489   -2.63    2.69  1.0000
 -11  -3  -2    3389     600                                                        3240    0.02   -0.87  1.0000
 -11  -3  -2    1799     650                                                        1690    0.02   -0.87  1.0000
 -11   3   2    3933     630                                                        3780    0.07   -0.88  1.0000
 -11  -3   2    3551     670                                                        3390   -0.01   -0.88  1.0000
 -11   3  -2    3824     620                                                        3660   -0.02   -0.86  1.0000
 -12   3   2    1170     560                                                         830    1.52    1.77  1.0000
 -12  -3  -2     867     620                                                         580   -1.59   -1.70  1.0000
 -12  -3   2    2089     570                                                        1630   -1.58    1.69  1.0000
 -12   3  -2     845     530                                                         560    1.54   -1.76  1.0000
 -13  -3  -2    4663     920                                                        4520   -1.04   -0.60  1.0000
 -13   3   2    4054     780                                                        3920   -1.04   -0.60  1.0000
 -13  -3   2    4815     840                                                        4660    1.03   -0.61  1.0000
 -14  -3  -2    1471     870                                                        1750    1.46    0.51  1.0000
 -14   3   2    3642     910                                                        4090   -1.52   -0.48  1.0000
 -14   3  -2    3425     890                                                        3850   -1.53    0.47  1.0000
 -14  -3   2    3727     860                                                        4150    1.46   -0.51  1.0000
 -15  -3  -2   15103    1730                                                       15738    1.60   -0.46  1.0000
 -15   3  -2   13764    1600                                                       14539   -1.66   -0.47  1.0000
   0  -4  -2    9807     260                                                        2660   64.56    0.20  1.0000
   0  -4  -2    8926     280                                                        3160   64.56    0.20  1.0000
   0   4  -2    9352     270                                                        2910   64.57    0.27  1.0000
   0   4  -2    9940     320                                                        2590   64.57    0.27  1.0000
   0  -4   2    8875     300                                                        3210   64.57   -0.27  1.0000
   0   4   2    9392     370                                                        2900   64.56   -0.20  1.0000
   1  -4   2    7453     440                                                        5929   28.54  -17.84  1.0000
  -1   4   2    7950     530                                                        6739  -28.55   17.87  1.0000
  -1  -4  -2    7111     410                                                        5379   28.44  -17.88  1.0000
  -1  -4  -2    7474     440                                                        5979   28.44  -17.88  1.0000
   1   4  -2    7478     580                                                        5999  -28.43   17.92  1.0000
  -1   4   2    7167     490                                                        5469  -28.55   17.87  1.0000
  -1  -4   2    7078     390                                                        5039  -28.43  -17.92  1.0000
   1   4   2    7033     510                                                        4950   28.44   17.88  1.0000
   1   4   2    6921     470                                                        4760   28.44   17.88  1.0000
   1  -4  -2    6893     400                                                        4710  -28.55  -17.87  1.0000
  -1   4  -2    7269     460                                                        5329   28.54   17.84  1.0000
   1  -4  -2    6823     420                                                        4590  -28.55  -17.87  1.0000
  -1  -4   2    6872     430                                                        4690  -28.43  -17.92  1.0000
  -1   4  -2    7226     390                                                        5259   28.54   17.84  1.0000
  -2   4   2    9052    1140                                                       18278   12.47   12.10  1.0000
  -2  -4  -2    6739    1140                                                       14859   12.38   12.05  1.0000
  -2  -4  -2    6258    1070                                                       14139   12.38   12.05  1.0000
   2   4  -2    5988    1210                                                       13729   12.37   12.06  1.0000
  -2  -4   2    6789    1030                                                       14889   12.37  -12.06  1.0000
  -2   4  -2    9137    1150                                                       18358   12.49  -12.08  1.0000
   2  -4  -2    6756    1090                                                       14899   12.47  -12.10  1.0000
   2  -4  -2    8037    1080                                                       16778   12.47  -12.10  1.0000
  -2   4  -2    8905    1070                                                       18028   12.49  -12.08  1.0000
   2   4   2    6700    1190                                                       14759   12.38  -12.05  1.0000
   2   4   2    7078    1080                                                       15318   12.38  -12.05  1.0000
  -2  -4   2    7434    1110                                                       15838   12.37  -12.06  1.0000
  -3   4   2   16522    1070                                                       17618   -4.46    9.21  1.0000
  -3  -4  -2   13846    1090                                                       14779    4.50   -9.19  1.0000
   3   4  -2   16123    1150                                                       17178   -4.48    9.18  1.0000
  -3  -4  -2   15099    1010                                                       16098    4.50   -9.19  1.0000
  -3   4  -2   13665    1010                                                       14429    4.48    9.22  1.0000
   3  -4  -2   12572    1040                                                       13289   -4.46   -9.21  1.0000
  -3  -4   2   12180     960                                                       12859   -4.48   -9.18  1.0000
   3   4   2   13433     980                                                       14169    4.50    9.19  1.0000
   3   4   2   13309    1120                                                       14039    4.50    9.19  1.0000
  -3  -4   2   13609    1050                                                       14359   -4.48   -9.18  1.0000
  -3   4  -2   15068    1100                                                       15898    4.48    9.22  1.0000
  -4   4   2    3779     210                                                        1420   11.58   18.95  1.0000
   4   4  -2    3394     270                                                         980   11.55   18.96  1.0000
  -4  -4  -2    3262     190                                                         830   11.57   18.97  1.0000
   4  -4   2    3267     200                                                         840   11.61   18.96  1.0000
  -4  -4   2    3676     160                                                         850   11.55  -18.96  1.0000
  -4   4  -2    4080     250                                                        1230   11.61  -18.96  1.0000
   4   4   2    3631     150                                                         810   11.57  -18.97  1.0000
  -4   4  -2    3724     160                                                         900   11.61  -18.96  1.0000
  -4  -4   2    3444     220                                                         640   11.55  -18.96  1.0000
   4   4   2    3276     250                                                         490   11.57  -18.97  1.0000
  -5   4   2     388     250                                                        1290   -1.44    7.71  1.0000
   5   4  -2     523     320                                                        1550   -1.46    7.77  1.0000
  -5  -4  -2     198     220                                                         900    1.47   -7.77  1.0000
  -5  -4   2     326     290                                                        1200   -1.46   -7.77  1.0000
  -5   4  -2     495     290                                                        1510    1.47    7.69  1.0000
  -5   4  -2     534     220                                                        1580    1.47    7.69  1.0000
  -5  -4   2     302     220                                                        1150   -1.46   -7.77  1.0000
  -6  -4  -2   21741    1500                                                       20778    6.83   13.93  1.0000
  -6   4   2   23163    1580                                                       22228    6.79   13.91  1.0000
  -6   4  -2   22091    1540                                                       22088    6.79  -13.87  1.0000
  -6   4  -2   22839    1630                                                       22858    6.79  -13.87  1.0000
  -6  -4   2   22131    1480                                                       22128    6.86  -13.98  1.0000
  -6  -4   2   21432    1550                                                       21408    6.86  -13.98  1.0000
  -7   4   2     850     310                                                         810   -0.83    2.91  1.0000
  -7  -4  -2     885     290                                                         850    0.80   -2.94  1.0000
  -7  -4   2    1613     280                                                        1510   -0.79   -2.93  1.0000
  -7  -4   2    1359     340                                                        1260   -0.79   -2.93  1.0000
  -7   4  -2     903     260                                                         810    0.83    2.97  1.0000
  -7   4  -2     852     330                                                         760    0.83    2.97  1.0000
  -8   4   2    8720     930                                                       11079   -0.25   10.33  1.0000
  -8  -4  -2    9741     890                                                       12309   -0.31   10.44  1.0000
  -8  -4   2    7528     920                                                        9809   -0.31  -10.41  1.0000
  -8  -4   2    6500     840                                                        8599   -0.31  -10.41  1.0000
  -8   4  -2    7681    1000                                                        9969   -0.25  -10.43  1.0000
  -8   4  -2    7262     870                                                        9479   -0.25  -10.43  1.0000
  -9   4   2     809     360                                                         580   -0.53    1.80  1.0000
  -9  -4  -2    1218     380                                                         940    0.53   -1.75  1.0000
  -9  -4   2    1475     420                                                        1160   -0.55   -1.79  1.0000
  -9   4  -2     336     390                                                         200    0.50    1.73  1.0000
  -9   4  -2     216     320                                                         110    0.50    1.73  1.0000
 -10  -4  -2    2021     490                                                        2400   -2.33    1.11  1.0000
 -10   4   2    2053     520                                                        2420   -2.26    1.09  1.0000
 -10  -4  -2    1576     600                                                        1910   -2.33    1.11  1.0000
 -10   4  -2    1963     490                                                        2300   -2.23   -1.09  1.0000
 -10   4  -2    2046     560                                                        2390   -2.23   -1.09  1.0000
 -10  -4   2    1802     560                                                        2150   -2.36   -1.10  1.0000
 -11  -4  -2    3438     750                                                        3110   -1.42    0.82  1.0000
 -11   4   2    4421     650                                                        4050    1.43   -0.86  1.0000
 -11  -4  -2    3930     600                                                        3580   -1.42    0.82  1.0000
 -11   4  -2    4291     690                                                        3890   -1.43   -0.82  1.0000
 -11   4  -2    4060     630                                                        3670   -1.43   -0.82  1.0000
 -11  -4   2    3622     640                                                        3260    1.41    0.86  1.0000
 -12  -4  -2    9241    1200                                                        9219    0.18   -1.48  1.0000
 -12   4   2    9736    1050                                                        9699    0.21   -1.41  1.0000
 -12  -4   2    8616    1040                                                        8509    0.19    1.44  1.0000
 -12   4  -2    8871    1090                                                        8749    0.22    1.42  1.0000
 -13   4   2     575     600                                                         560   -0.24    0.34  1.0000
 -13  -4  -2     525     730                                                         510    0.22   -0.33  1.0000
 -13   4  -2     462     590                                                         450    0.22    0.33  1.0000
 -13  -4   2       1     560                                                        -470   -0.19   -0.32  1.0000
 -14  -4  -2    1529     850                                                        1160    1.80   -1.34  1.0000
 -14   4  -2    1166     680                                                         840    1.80    1.36  1.0000
 -14  -4   2     343     690                                                         180    1.77    1.34  1.0000
 -15   4   2    5056    1100                                                        5599   -2.43    0.73  1.0000
 -15  -4  -2    3133    1100                                                        3570    2.49   -0.74  1.0000
 -15   4  -2    2824     960                                                        3270    2.44    0.74  1.0000
   0   5   2     110    1290                                                       15688    0.12   56.81  1.0000
   0  -5  -2     100    1110                                                       15988    0.12  -56.81  1.0000
   0  -5  -2     109    1100                                                       15778    0.12  -56.81  1.0000
   0  -5   2      70    1110                                                       17028    0.15   56.79  1.0000
   0   5  -2      91    1220                                                       16198    0.15  -56.79  1.0000
  -1   5   2   12060     950                                                       12269    1.89   -3.04  1.0000
  -1   5   2   10202     850                                                       10389    1.89   -3.04  1.0000
   1   5  -2   11841    1020                                                       12009   -1.86    3.15  1.0000
   1  -5   2   12001     850                                                       12259   -1.99    3.03  1.0000
  -1  -5  -2   11814     830                                                       12029    1.95   -3.14  1.0000
   1   5   2   11276     880                                                       11579    1.95    3.14  1.0000
  -1  -5   2   12053     850                                                       12319   -1.86   -3.15  1.0000
   1  -5  -2   12106     820                                                       12409    1.89    3.04  1.0000
   1   5   2    9890     960                                                       10169    1.95    3.14  1.0000
  -1   5  -2   11633     820                                                       11979   -1.99   -3.03  1.0000
  -1   5  -2   11014     900                                                       11349   -1.99   -3.03  1.0000
   1  -5  -2   11505     840                                                       11799    1.89    3.04  1.0000
  -2  -5  -2   20989    3770                                                       63504   -4.27  -46.41  1.0000
   2  -5   2   20535    3770                                                       62754    4.52   46.45  1.0000
  -2  -5  -2   20429    3920                                                       62524   -4.27  -46.41  1.0000
   2   5  -2   21405    4030                                                       64214   -4.26  -46.40  1.0000
  -2   5   2   18883    3950                                                       59824    4.54   46.45  1.0000
   2  -5  -2   16272    3860                                                       55074    4.54  -46.45  1.0000
   2  -5  -2   18235    3790                                                       58654    4.54  -46.45  1.0000
  -2  -5   2   18114    3720                                                       58384   -4.26   46.40  1.0000
  -2   5  -2   15240    3950                                                       53155    4.52  -46.45  1.0000
   2   5   2   17493    4000                                                       57274   -4.27   46.41  1.0000
  -2   5  -2   16119    3850                                                       54795    4.52  -46.45  1.0000
   2   5   2   17984    3750                                                       58164   -4.27   46.41  1.0000
  -2  -5   2   16892    3780                                                       56164   -4.26   46.40  1.0000
  -3  -5  -2   11768     680                                                        8739   -6.24   -1.68  1.0000
   3  -5   2   10758     620                                                        7949    6.04    1.74  1.0000
   3   5  -2   11346     770                                                        8369    6.25    1.70  1.0000
  -3  -5  -2   11803     630                                                        8769   -6.24   -1.68  1.0000
  -3   5   2   12417     660                                                        9379   -6.04   -1.76  1.0000
   3  -5  -2    9650     660                                                        7009   -6.04    1.76  1.0000
   3   5   2   10895     580                                                        7999   -6.24    1.68  1.0000
  -3  -5   2   10610     530                                                        7749    6.25   -1.70  1.0000
  -3  -5   2   11786     680                                                        8759    6.25   -1.70  1.0000
   3  -5  -2   10759     580                                                        7959   -6.04    1.76  1.0000
  -3   5  -2   10255     660                                                        7529    6.04   -1.74  1.0000
  -3   5  -2   10535     570                                                        7769    6.04   -1.74  1.0000
   3   5   2   10521     730                                                        7679   -6.24    1.68  1.0000
   4   5  -2    4749     970                                                       11389    9.64  -16.45  1.0000
  -4   5   2    4459     870                                                       10939   -9.69   16.45  1.0000
  -4  -5  -2    5262     840                                                       12209    9.67  -16.43  1.0000
  -4  -5   2    4806     900                                                       12089    9.64   16.45  1.0000
   4   5   2    4755     780                                                       12009    9.67   16.43  1.0000
  -4   5  -2    4176     910                                                       11079   -9.72  -16.43  1.0000
  -4  -5   2    4311     750                                                       11279    9.64   16.45  1.0000
   4   5   2    4699     970                                                       11919    9.67   16.43  1.0000
  -4   5  -2    3968     800                                                       10729   -9.72  -16.43  1.0000
   5  -5   2    1282     230                                                         810    0.66    3.79  1.0000
  -5  -5  -2    2716     280                                                        2020   -0.63   -3.79  1.0000
   5   5  -2    2561     370                                                        1890    0.60    3.80  1.0000
  -5   5   2    2438     280                                                        1780   -0.63   -3.79  1.0000
  -5  -5   2    1840     320                                                        1300    0.60   -3.80  1.0000
  -5   5  -2    2303     320                                                        1690    0.66   -3.79  1.0000
  -5  -5   2    1910     200                                                        1360    0.60   -3.80  1.0000
   5   5   2    2403     390                                                        1780   -0.63    3.79  1.0000
  -5   5  -2    2163     220                                                        1570    0.66   -3.79  1.0000
  -6   5   2   13037    1100                                                       14249  -10.29    2.47  1.0000
   6   5  -2   12310    1170                                                       13489   10.28   -2.42  1.0000
  -6  -5  -2   13110    1060                                                       14339   10.25   -2.42  1.0000
  -6  -5   2   12615    1020                                                       13979   10.28    2.42  1.0000
  -6  -5   2   14198    1120                                                       15678   10.28    2.42  1.0000
  -6   5  -2   13514    1150                                                       14919  -10.26   -2.47  1.0000
  -6   5  -2   12955    1050                                                       14319  -10.26   -2.47  1.0000
  -7   5   2      26     270                                                         230    6.78   -0.53  1.0000
  -7  -5  -2      33     270                                                         310    6.82   -0.50  1.0000
  -7  -5   2      61     300                                                         420   -6.83   -0.49  1.0000
  -7   5  -2      29     230                                                         230   -6.76   -0.57  1.0000
  -7  -5   2      60     230                                                          90   -6.83   -0.49  1.0000
  -7   5  -2      31     310                                                         180   -6.76   -0.57  1.0000
  -8   5   2    2022     490                                                        3620    5.39   -4.87  1.0000
  -8  -5  -2    1800     470                                                        3310   -5.36    4.88  1.0000
  -8   5  -2    1722     430                                                        3270    5.39    4.88  1.0000
  -8  -5   2    1591     530                                                        3080   -5.36   -4.88  1.0000
  -8   5  -2    1264     540                                                        2620    5.39    4.88  1.0000
  -9  -5  -2     137     350                                                         160   -7.04   -0.81  1.0000
  -9   5   2     140     340                                                          90   -7.01   -0.86  1.0000
  -9  -5   2     271     380                                                        -390    7.04   -0.85  1.0000
  -9   5  -2     269     320                                                         -20    7.01   -0.84  1.0000
  -9   5  -2     269     400                                                        -120    7.01   -0.84  1.0000
[truncated: 3,766,599 more chars]
